# Supplementary material
Source: publisher site journal article supplement (https://www.spandidos-publications.com/7570/downloadSupplementary)
Supplement: Supplementary file 1 [file downloadSupplementary]

## Sheet: Table SII
Table SII. Differential expression genes (DEGs) obtained from training cohort (GSE185263).
ID	logFC	logCPM	F	P-value	False discrovery rate	change	gene
ADAMTS12	-3.32706	-2.48545	257.77	5.05194e-45	1.02751e-40	down	ADAMTS12
RCAN3	-1.80475	4.87733	222.475	3.11439e-40	3.16718e-36	down	RCAN3
ABLIM1	-1.67984	5.53142	219.728	7.54448e-40	5.11491e-36	down	ABLIM1
KAT6B	-1.22579	3.65987	211.135	1.2339e-38	5.01926e-35	down	KAT6B
ZBTB40	-1.03362	4.35759	192.698	5.68703e-36	1.65241e-32	down	ZBTB40
AMIGO1	-1.75054	2.2518	185.463	6.65985e-35	1.50505e-31	down	AMIGO1
GLRX	1.75602	6.34475	185.042	7.69071e-35	1.56421e-31	up	GLRX
NCMAP-DT	-1.80232	1.26412	183.999	1.09989e-34	2.03369e-31	down	NCMAP-DT
KLHL3	-1.95175	1.33227	183.69	1.22288e-34	2.07267e-31	down	KLHL3
NELL2	-2.17888	3.5846	180.579	3.56782e-34	5.18327e-31	down	NELL2
GSTO1	1.63468	5.87604	180.248	3.99956e-34	5.42314e-31	up	GSTO1
RNASE2	3.21267	6.10778	179.354	5.44809e-34	6.92554e-31	up	RNASE2
TXN	2.47119	5.85979	179.099	5.95014e-34	7.11882e-31	up	TXN
CLIC1	1.82759	9.05152	178.872	6.43683e-34	7.27326e-31	up	CLIC1
LOC105376548	-2.62095	-0.809433	174.345	3.10429e-33	3.32307e-30	down	LOC105376548
MIR4435-2HG	1.58138	4.43045	173.637	3.97522e-33	4.0426e-30	up	MIR4435-2HG
NR3C2	-2.02187	1.42446	172.269	6.41642e-33	6.21446e-30	down	NR3C2
NRCAM	-2.92135	-0.740689	170.622	1.14344e-32	1.05711e-29	down	NRCAM
ETS1	-1.52717	7.54212	168.627	2.30725e-32	2.04031e-29	down	ETS1
POMP	1.63752	5.1588	167.611	3.30287e-32	2.79904e-29	up	POMP
TTC3	-1.2074	5.42487	166.892	4.25882e-32	3.4648e-29	down	TTC3
DOCK9	-1.61398	3.48022	166.363	5.13597e-32	4.01771e-29	down	DOCK9
AK5	-2.04977	1.27241	165.991	5.85775e-32	4.41262e-29	down	AK5
EPHA4	-1.80459	1.64098	165.678	6.5455e-32	4.7546e-29	down	EPHA4
S100A9	3.19705	13.1364	165.384	7.265e-32	5.09527e-29	up	S100A9
MPRIP	-1.10501	5.30424	164.753	9.08922e-32	6.16219e-29	down	MPRIP
ATP6V1E1	1.16267	5.99947	163.071	1.65287e-31	1.08444e-28	up	ATP6V1E1
RASGRF2	-1.7707	1.98643	160.538	4.08329e-31	2.44265e-28	down	RASGRF2
TSHZ1	-1.15763	3.27539	159.703	5.50688e-31	3.20012e-28	down	TSHZ1
DSC1	-2.57446	-0.616198	159.229	6.52649e-31	3.68728e-28	down	DSC1
TMEM59	1.09446	7.13877	158.07	9.89275e-31	5.43807e-28	up	TMEM59
LOC105378576	-2.60201	-1.43867	157.862	1.06622e-30	5.70681e-28	down	LOC105378576
CA5BP1-CA5B	-1.06316	2.81777	157.378	1.26888e-30	6.61737e-28	down	CA5BP1-CA5B
BCL11B	-1.72739	5.08408	156.561	1.70332e-30	8.66093e-28	down	BCL11B
FCGR1A	3.67188	7.30615	155.857	2.19583e-30	1.08929e-27	up	FCGR1A
SLC26A8	2.68041	4.92064	155.268	2.7163e-30	1.3154e-27	up	SLC26A8
PLXDC1	-1.82477	1.6424	155.158	2.8266e-30	1.33698e-27	down	PLXDC1
CHD6	-1.03406	4.15464	154.835	3.17575e-30	1.46799e-27	down	CHD6
POU6F1	-1.34766	2.6164	154.592	3.46861e-30	1.56773e-27	down	POU6F1
IFFO2	-1.15911	3.49686	153.999	4.29798e-30	1.90036e-27	down	IFFO2
NOG	-2.52016	0.313793	153.852	4.53403e-30	1.91607e-27	down	NOG
CA5B	-1.17728	2.55281	153.803	4.61417e-30	1.91607e-27	down	CA5B
LMNB1	2.05664	7.5741	153.761	4.68569e-30	1.91607e-27	up	LMNB1
DENND11	-1.46646	3.61973	153.746	4.71032e-30	1.91607e-27	down	DENND11
BLOC1S1	1.94477	4.87762	153.31	5.51848e-30	2.20079e-27	up	BLOC1S1
PCMT1	1.41543	5.90891	153.124	5.90238e-30	2.30862e-27	up	PCMT1
SFT2D1	1.01136	5.01243	152.526	7.33357e-30	2.81429e-27	up	SFT2D1
KMT2A	-1.05976	5.58111	151.989	8.91543e-30	3.35798e-27	down	KMT2A
MS4A4A	3.50593	4.27014	151.923	9.13148e-30	3.37682e-27	up	MS4A4A
MDN1	-1.15862	4.15835	151.344	1.12727e-29	4.0942e-27	down	MDN1
SLC16A10	-2.215	0.569431	151.258	1.1629e-29	4.1495e-27	down	SLC16A10
NDUFB3	2.06769	4.39214	149.894	1.9121e-29	6.70522e-27	up	NDUFB3
SLC25A18	1.21338	2.1065	149.65	2.09018e-29	7.20546e-27	up	SLC25A18
GPRASP1	-1.86751	2.58502	149.288	2.38556e-29	8.08665e-27	down	GPRASP1
OXNAD1	-1.31397	4.72778	149.084	2.57069e-29	8.57134e-27	down	OXNAD1
MCEMP1	5.12167	8.0114	148.301	3.42325e-29	1.12299e-26	up	MCEMP1
PLEKHA1	-1.59313	3.5754	147.759	4.17454e-29	1.34771e-26	down	PLEKHA1
PAQR8	-1.05907	3.66073	147.154	5.21008e-29	1.65575e-26	down	PAQR8
AMOT	-1.70262	0.408656	146.147	7.5422e-29	2.32426e-26	down	AMOT
ANXA3	3.98589	8.08588	145.189	1.07271e-28	3.25638e-26	up	ANXA3
TGIF2-RAB5IF	1.6084	6.0402	144.491	1.38741e-28	4.14978e-26	up	TGIF2-RAB5IF
AKT3	-1.18574	3.01568	144.443	1.41239e-28	4.16329e-26	down	AKT3
CD63	1.94242	7.93141	144.242	1.52097e-28	4.41928e-26	up	CD63
ARHGEF9	-1.10016	2.91282	144.195	1.54748e-28	4.433e-26	down	ARHGEF9
UFD1	1.00291	4.76249	143.815	1.78033e-28	5.02918e-26	up	UFD1
PIK3C2B	-1.36487	2.8196	143.212	2.22485e-28	6.1988e-26	down	PIK3C2B
ZBTB25	-1.34603	4.04796	142.979	2.42465e-28	6.66417e-26	down	ZBTB25
RAB5IF	1.64275	6.14234	142.87	2.52458e-28	6.84633e-26	up	RAB5IF
SF3B6	1.54035	4.68416	142.638	2.75066e-28	7.36127e-26	up	SF3B6
METTL7B	6.16621	2.67945	142.34	3.07214e-28	8.11485e-26	up	METTL7B
FCGR1CP	3.58439	5.84317	142.305	3.11231e-28	8.11555e-26	up	FCGR1CP
S100A8	3.95105	11.547	141.284	4.54256e-28	1.15489e-25	up	S100A8
UNC5A	2.90912	2.479	141.168	4.74213e-28	1.19074e-25	up	UNC5A
GCNT4	-2.03053	1.98679	140.616	5.82239e-28	1.44416e-25	down	GCNT4
RNASE2CP	3.11884	1.85576	140.503	6.07201e-28	1.48794e-25	up	RNASE2CP
CNIH4	1.66222	5.70652	140.444	6.20477e-28	1.50237e-25	up	CNIH4
EPHX2	-1.55565	2.21964	139.848	7.7448e-28	1.85319e-25	down	EPHX2
PATJ	-1.56556	2.788	139.701	8.18046e-28	1.93378e-25	down	PATJ
LINC01259	-2.29945	-0.776775	139.671	8.27172e-28	1.93378e-25	down	LINC01259
FBLN7	-1.36482	1.64677	139.323	9.41583e-28	2.15178e-25	down	FBLN7
TP53I3	2.09895	3.24816	139.269	9.60907e-28	2.17154e-25	up	TP53I3
PLBD1	1.97562	9.12659	138.889	1.10705e-27	2.47431e-25	up	PLBD1
NOP10	1.73149	5.79175	138.273	1.39249e-27	3.07846e-25	up	NOP10
DYNLT1	1.82584	6.13403	137.642	1.76276e-27	3.81758e-25	up	DYNLT1
SATB1	-1.02066	5.68719	137.639	1.76436e-27	3.81758e-25	down	SATB1
SQOR	1.67749	7.43035	137.547	1.82605e-27	3.90948e-25	up	SQOR
FCGR1BP	3.03911	6.61861	136.095	3.14382e-27	6.52471e-25	up	FCGR1BP
PSMD4	1.0475	6.55001	135.233	4.34392e-27	8.8351e-25	up	PSMD4
LEF1	-1.66038	5.28902	134.881	4.95827e-27	9.98477e-25	down	LEF1
CKMT2	-1.53033	0.614335	134.852	5.01145e-27	9.99293e-25	down	CKMT2
DYRK2	-1.4988	4.8436	134.237	6.31512e-27	1.24005e-24	down	DYRK2
IL7R	-1.69657	7.5109	134.226	6.3408e-27	1.24005e-24	down	IL7R
MID2	-1.76956	1.11058	134.16	6.50222e-27	1.25951e-24	down	MID2
LILRA5	2.9274	8.49692	134.008	6.88317e-27	1.3069e-24	up	LILRA5
GLA	1.15738	4.24053	133.987	6.93961e-27	1.3069e-24	up	GLA
H2AC19	3.02375	5.36462	133.687	7.76782e-27	1.44945e-24	up	H2AC19
MYL6	2.00099	8.8753	133.258	9.12949e-27	1.68804e-24	up	MYL6
UBL5	1.55414	5.37989	133.029	9.95071e-27	1.82331e-24	up	UBL5
LAPTM4A	1.00189	6.60841	132.832	1.07205e-26	1.94683e-24	up	LAPTM4A
INPP4B	-1.7907	3.88766	132.631	1.15659e-26	2.08175e-24	down	INPP4B
MYL12B	1.22278	7.65777	132.557	1.18933e-26	2.12191e-24	up	MYL12B
BLOC1S1-RDH5	1.82463	4.21776	132.254	1.33297e-26	2.3575e-24	up	BLOC1S1-RDH5
ANKRD22	4.86669	6.20081	131.921	1.5117e-26	2.6279e-24	up	ANKRD22
MXD3	1.41225	6.00096	131.146	2.02666e-26	3.43502e-24	up	MXD3
S100A12	4.76456	9.53049	130.693	2.40533e-26	4.04314e-24	up	S100A12
LOC105374808	-2.02543	-0.366524	130.393	2.6944e-26	4.49192e-24	down	LOC105374808
SDF2	1.14063	5.21394	129.946	3.19227e-26	5.23609e-24	up	SDF2
UPP1	2.85165	6.49526	129.869	3.28731e-26	5.34884e-24	up	UPP1
NDUFAF1	1.08858	3.93674	128.647	5.22869e-26	8.37373e-24	up	NDUFAF1
CYTOR	1.74856	3.41775	128.427	5.68444e-26	9.03249e-24	up	CYTOR
GTF2B	1.13884	4.94971	128.4	5.74289e-26	9.05462e-24	up	GTF2B
FAM169A	-1.72477	1.22967	127.824	7.14902e-26	1.09596e-23	down	FAM169A
H2AC18	2.94761	5.42755	127.818	7.16667e-26	1.09596e-23	up	H2AC18
HP	4.9744	7.16838	127.703	7.48615e-26	1.13628e-23	up	HP
S100A6	1.83656	8.61665	127.676	7.5646e-26	1.13968e-23	up	S100A6
ATP6V0E1	1.51485	7.61723	127.368	8.50501e-26	1.26581e-23	up	ATP6V0E1
LRIG1	-1.23263	2.56724	127.362	8.52629e-26	1.26581e-23	down	LRIG1
RASGRP1	-1.51026	4.93849	127.288	8.77101e-26	1.29271e-23	down	RASGRP1
MTR	-1.31696	3.85197	127.167	9.18256e-26	1.34363e-23	down	MTR
MS4A6A	1.43995	7.3117	127.079	9.49749e-26	1.37978e-23	up	MS4A6A
MAFG	1.67322	5.26008	126.925	1.00716e-25	1.45281e-23	up	MAFG
AIM2	2.60055	5.5813	126.796	1.05796e-25	1.51535e-23	up	AIM2
MGST1	1.67071	4.05935	126.702	1.09663e-25	1.55974e-23	up	MGST1
HTATIP2	1.29156	5.84599	126.656	1.11621e-25	1.57656e-23	up	HTATIP2
PIGL	-1.43077	2.34834	126.554	1.16022e-25	1.62742e-23	down	PIGL
GNG5	1.58423	6.91319	126.473	1.19668e-25	1.66707e-23	up	GNG5
MYL12-AS1	1.42774	6.63316	126.355	1.25214e-25	1.73247e-23	up	MYL12-AS1
MORC4	-1.38008	1.19335	126.17	1.34357e-25	1.8464e-23	down	MORC4
ZNF831	-1.45765	3.68288	125.849	1.51869e-25	2.07306e-23	down	ZNF831
GAPDH	1.65977	10.2067	125.697	1.60969e-25	2.18264e-23	up	GAPDH
HK3	2.79798	8.32401	125.635	1.64863e-25	2.22063e-23	up	HK3
AGK	-1.18684	4.50244	125.607	1.66611e-25	2.22941e-23	down	AGK
MYD88	1.31736	8.36785	125.275	1.89167e-25	2.51468e-23	up	MYD88
FOXO1	-1.0279	4.83512	125.118	2.00911e-25	2.65346e-23	down	FOXO1
ACVR2B	-1.64955	1.31242	124.979	2.11867e-25	2.7801e-23	down	ACVR2B
MYL12A	1.41545	8.87952	124.736	2.32542e-25	3.03184e-23	up	MYL12A
H2BC5	2.1671	4.349	124.638	2.41439e-25	3.12779e-23	up	H2BC5
TCF7	-1.59377	6.45753	124.417	2.62789e-25	3.38282e-23	down	TCF7
CCR6	-1.58624	2.42878	124.337	2.70968e-25	3.46617e-23	down	CCR6
C1QC	5.29706	2.85977	124.019	3.06152e-25	3.89177e-23	up	C1QC
PSMA6	1.52377	5.43521	123.998	3.08592e-25	3.89365e-23	up	PSMA6
MAGEE1	-1.58851	0.387267	123.985	3.10129e-25	3.89365e-23	down	MAGEE1
RAB32	1.88632	5.68128	123.493	3.74619e-25	4.64596e-23	up	RAB32
MMADHC	1.34324	6.23546	123.346	3.96349e-25	4.85622e-23	up	MMADHC
BST1	1.62225	7.14237	123.237	4.13301e-25	5.03361e-23	up	BST1
HMGB2	2.18345	7.02434	122.491	5.50618e-25	6.66608e-23	up	HMGB2
ARPC3	1.32238	8.34801	122.296	5.93551e-25	7.14333e-23	up	ARPC3
LAMTOR5	1.65956	5.05402	122.263	6.01237e-25	7.19327e-23	up	LAMTOR5
IL10	3.73526	0.796811	122.157	6.26354e-25	7.38238e-23	up	IL10
MAN1C1	-1.25746	2.5972	121.884	6.95546e-25	8.08383e-23	down	MAN1C1
TCAF1	-1.10936	2.09103	121.848	7.05262e-25	8.15019e-23	down	TCAF1
SCART1	-1.93522	-0.173126	121.758	7.30334e-25	8.39224e-23	down	SCART1
ZNF548	-1.2411	2.98469	121.588	7.79668e-25	8.9088e-23	down	ZNF548
PTCH1	-1.72417	2.05544	121.404	8.37021e-25	9.51071e-23	down	PTCH1
LOC100507387	-1.98487	-0.356116	121.301	8.70996e-25	9.84177e-23	down	LOC100507387
FCER1G	2.88128	9.18266	121.179	9.12809e-25	1.02009e-22	up	FCER1G
MGA	-1.01299	4.34624	121.039	9.6347e-25	1.07082e-22	down	MGA
EDAR	-2.06171	0.147643	120.864	1.0311e-24	1.1336e-22	down	EDAR
LRRN3	-2.52844	1.927	120.625	1.13053e-24	1.23623e-22	down	LRRN3
ATP6V1D	1.29928	5.05222	120.451	1.20912e-24	1.31509e-22	up	ATP6V1D
APOBEC3B	1.74871	4.51877	120.358	1.25356e-24	1.35618e-22	up	APOBEC3B
GYG1	3.10482	7.89367	120.318	1.2729e-24	1.36982e-22	up	GYG1
IFI30	1.84134	9.22477	119.843	1.52981e-24	1.62056e-22	up	IFI30
TBC1D4	-1.55293	4.15022	119.592	1.68586e-24	1.77661e-22	down	TBC1D4
ZC3H8	-1.02793	2.77075	119.541	1.71949e-24	1.80271e-22	down	ZC3H8
LOC105372185	-2.55967	-1.44914	118.628	2.44959e-24	2.52905e-22	down	LOC105372185
NPAT	-1.14247	4.50598	118.563	2.51201e-24	2.58039e-22	down	NPAT
PDE4DIPP2	-1.02222	2.14052	118.235	2.853e-24	2.91594e-22	down	PDE4DIPP2
MAP3K5-AS2	1.21411	3.05207	118.141	2.95864e-24	3.00879e-22	up	MAP3K5-AS2
TMEM60	1.04178	3.64853	118.03	3.08851e-24	3.12523e-22	up	TMEM60
EDEM2	1.21731	4.71734	117.952	3.18417e-24	3.20608e-22	up	EDEM2
CD177	7.21712	9.20135	117.755	3.43642e-24	3.40943e-22	up	CD177
ADM	2.22043	6.49177	117.693	3.52046e-24	3.47585e-22	up	ADM
NLRC4	2.20551	6.86538	117.609	3.63714e-24	3.55479e-22	up	NLRC4
KLF12	-1.68733	4.20984	117.602	3.64706e-24	3.55479e-22	down	KLF12
LINC00402	-1.85642	1.23445	117.579	3.68064e-24	3.56479e-22	down	LINC00402
TLR5	2.3867	6.63466	117.555	3.71485e-24	3.58087e-22	up	TLR5
TESPA1	-1.32136	4.80697	117.274	4.14401e-24	3.95704e-22	down	TESPA1
IFITM1	2.37848	9.98985	117.251	4.18158e-24	3.9632e-22	up	IFITM1
UBE2F	1.42955	5.40874	117.246	4.18943e-24	3.9632e-22	up	UBE2F
ZNF33B	-1.11487	3.70752	117.16	4.33143e-24	4.07857e-22	down	ZNF33B
ATP5MJ	1.70635	4.18703	117.125	4.39135e-24	4.11593e-22	up	ATP5MJ
PPARG	3.58864	1.35684	117.092	4.44701e-24	4.14898e-22	up	PPARG
CD40LG	-1.50592	3.00115	117.049	4.52251e-24	4.20015e-22	down	CD40LG
CKLF	1.61809	5.31249	116.608	5.36901e-24	4.94119e-22	up	CKLF
C1QB	4.55146	4.05106	116.505	5.58966e-24	5.12109e-22	up	C1QB
ATG3	1.42956	6.69598	116.383	5.86018e-24	5.34485e-22	up	ATG3
LOC101928317	1.93118	3.87658	116.368	5.89514e-24	5.35274e-22	up	LOC101928317
SPON1	-1.94428	-0.334433	116.23	6.22129e-24	5.61331e-22	down	SPON1
LIPM	4.43156	3.63382	116.223	6.23732e-24	5.61331e-22	up	LIPM
C19orf38	1.82588	6.57263	116.16	6.39332e-24	5.72836e-22	up	C19orf38
TRAF5	-1.33232	4.21419	115.869	7.1612e-24	6.38823e-22	down	TRAF5
NANS	1.19386	4.41475	115.674	7.72823e-24	6.83411e-22	up	NANS
NEU1	1.04543	4.97852	115.595	7.97019e-24	7.01756e-22	up	NEU1
BCL9L	-1.23919	4.70057	115.487	8.31251e-24	7.26083e-22	down	BCL9L
DCAF16	-1.04042	3.93529	115.485	8.31787e-24	7.26083e-22	down	DCAF16
FAM153CP	-1.84737	0.0942174	115.16	9.44377e-24	8.20841e-22	down	FAM153CP
CAMK4	-1.60527	4.07157	114.985	1.01131e-23	8.75277e-22	down	CAMK4
TXK	-1.20973	5.03968	114.819	1.07913e-23	9.30017e-22	down	TXK
RAB13	2.00626	2.72767	114.745	1.11063e-23	9.53124e-22	up	RAB13
DUSP3	1.37669	5.72295	114.699	1.13103e-23	9.66553e-22	up	DUSP3
GATA3	-1.40807	3.42404	114.555	1.19622e-23	1.01799e-21	down	GATA3
PLSCR1	2.47022	7.65172	114.544	1.2015e-23	1.01822e-21	up	PLSCR1
BACH2	-1.64867	3.82786	114.467	1.23836e-23	1.04107e-21	down	BACH2
ZNF286A	-1.18596	1.7038	114.432	1.25536e-23	1.05073e-21	down	ZNF286A
MMP24-AS1-EDEM2	1.15145	4.76027	114.313	1.31533e-23	1.09641e-21	up	MMP24-AS1-EDEM2
AUTS2	-1.48363	2.18839	114.117	1.42016e-23	1.17418e-21	down	AUTS2
C1GALT1C1	1.2879	4.23731	114.03	1.46902e-23	1.20965e-21	up	C1GALT1C1
CKLF-CMTM1	1.67918	4.78735	113.999	1.48698e-23	1.2195e-21	up	CKLF-CMTM1
SAT1	1.53692	9.36209	113.889	1.55246e-23	1.26809e-21	up	SAT1
H3C4	2.40592	2.30806	113.871	1.56373e-23	1.27219e-21	up	H3C4
PRELID1	1.37866	6.2865	113.824	1.59258e-23	1.2905e-21	up	PRELID1
NR1D2	-1.48046	3.60543	113.743	1.64395e-23	1.32684e-21	down	NR1D2
FHIT	-1.55664	2.58641	113.626	1.72078e-23	1.38335e-21	down	FHIT
LMO7	-1.61622	1.8401	113.302	1.95365e-23	1.56438e-21	down	LMO7
VPS25	1.207	4.22285	113.286	1.96606e-23	1.56815e-21	up	VPS25
MILR1	1.72152	5.54123	113.202	2.03199e-23	1.6144e-21	up	MILR1
LY96	2.06131	5.19101	113.184	2.0468e-23	1.61984e-21	up	LY96
CST7	2.90386	8.52851	113.126	2.09318e-23	1.65013e-21	up	CST7
DDHD2	-1.05833	3.91248	112.849	2.33413e-23	1.83297e-21	down	DDHD2
LRBA	-1.16728	4.23368	112.731	2.44437e-23	1.90483e-21	down	LRBA
FAM117B	-1.20874	3.88145	112.551	2.62311e-23	2.02857e-21	down	FAM117B
GBA1	1.42545	5.93133	112.475	2.70257e-23	2.0821e-21	up	GBA1
ELAPOR2	-1.64282	0.813517	112.417	2.7649e-23	2.12209e-21	down	ELAPOR2
LILRB4	1.86831	5.14883	112.227	2.97957e-23	2.27825e-21	up	LILRB4
AXIN2	-1.69529	1.4372	111.987	3.27342e-23	2.49356e-21	down	AXIN2
ZNF395	-1.02926	3.8216	111.9	3.38814e-23	2.57132e-21	down	ZNF395
GLIPR2	1.2623	8.18828	111.837	3.47313e-23	2.60935e-21	up	GLIPR2
LOC105375034	2.33256	1.53436	111.796	3.52997e-23	2.63956e-21	up	LOC105375034
CCL28	-1.42403	1.54395	111.775	3.55917e-23	2.65165e-21	down	CCL28
YIPF1	1.43125	5.82759	111.722	3.63301e-23	2.69678e-21	up	YIPF1
MSANTD2	-1.11511	3.18016	111.681	3.6925e-23	2.73098e-21	down	MSANTD2
SRA1	1.08837	5.00383	111.586	3.83308e-23	2.82449e-21	up	SRA1
C4orf51	-1.42805	0.512084	111.544	3.89765e-23	2.85159e-21	down	C4orf51
RAB24	1.77833	7.27718	111.494	3.97495e-23	2.88738e-21	up	RAB24
CYSTM1	3.69362	7.15386	111.376	4.16371e-23	3.01373e-21	up	CYSTM1
GBAP1	1.39171	3.84202	111.321	4.25478e-23	3.06872e-21	up	GBAP1
PSMA2	1.29174	5.13688	111.264	4.35071e-23	3.12682e-21	up	PSMA2
SMARCD3	1.84557	5.21678	111.246	4.38275e-23	3.13876e-21	up	SMARCD3
IL10RB	1.25186	7.55333	111.226	4.41756e-23	3.15259e-21	up	IL10RB
HPR	5.26016	3.83069	111.108	4.62696e-23	3.27901e-21	up	HPR
TRABD2A	-1.55736	3.80791	111.065	4.70561e-23	3.32318e-21	down	TRABD2A
VSIG1	-1.57818	1.90567	111.048	4.73788e-23	3.33439e-21	down	VSIG1
KIF3A	-1.2371	2.14966	111.016	4.79721e-23	3.3645e-21	down	KIF3A
C3AR1	2.45828	6.69184	110.998	4.83167e-23	3.37702e-21	up	C3AR1
CASP1	1.42695	8.20646	110.969	4.88715e-23	3.4041e-21	up	CASP1
FAM153A	-1.85257	2.07933	110.909	5.00418e-23	3.47372e-21	down	FAM153A
ZIK1	-1.33285	1.15791	110.422	6.06384e-23	4.19498e-21	down	ZIK1
RECK	-1.18662	2.23388	110.349	6.23941e-23	4.30181e-21	down	RECK
NMT2	-1.3097	3.30821	110.198	6.62185e-23	4.51952e-21	down	NMT2
GPR84	5.45675	4.89498	110.166	6.70603e-23	4.56167e-21	up	GPR84
COX6A1	1.40312	5.12031	110.14	6.77609e-23	4.58356e-21	up	COX6A1
PPFIBP1	-1.44403	-0.00409955	110.137	6.78328e-23	4.58356e-21	down	PPFIBP1
LOC105369402	4.69564	3.68279	110.1	6.88343e-23	4.63583e-21	up	LOC105369402
DDAH2	2.55169	5.03075	110.056	7.00561e-23	4.70254e-21	up	DDAH2
PGK1	1.25952	8.87885	109.958	7.27983e-23	4.87054e-21	up	PGK1
H2BC21	1.96397	6.3812	109.892	7.47305e-23	4.98342e-21	up	H2BC21
USB1	1.78022	6.97213	109.862	7.56073e-23	5.02541e-21	up	USB1
ABI2	-1.02415	3.25226	109.694	8.08036e-23	5.35331e-21	down	ABI2
COX7A2	1.51868	4.61791	109.567	8.49725e-23	5.61122e-21	up	COX7A2
AGAP10P	-1.15771	0.466407	109.443	8.92165e-23	5.87241e-21	down	AGAP10P
LOC107987267	-2.35837	-1.52662	109.433	8.95998e-23	5.87861e-21	down	LOC107987267
AHNAK	-1.1766	8.63231	109.356	9.23516e-23	6.03968e-21	down	AHNAK
CAPG	1.92188	6.7316	109.322	9.3614e-23	6.10262e-21	up	CAPG
LOC112267970	-1.44366	0.813131	109.137	1.00714e-22	6.52363e-21	down	LOC112267970
HSD3B7	2.5542	2.17379	109.045	1.04422e-22	6.72099e-21	up	HSD3B7
CSTA	2.10003	5.23374	109.003	1.06174e-22	6.81221e-21	up	CSTA
GMFG	1.65609	7.58025	108.833	1.1356e-22	7.24044e-21	up	GMFG
COPG2IT1	-2.06497	-1.44644	108.803	1.14928e-22	7.30478e-21	down	COPG2IT1
FCGBP	-1.87897	1.5879	108.712	1.19118e-22	7.52406e-21	down	FCGBP
ALMS1	-1.15809	2.85521	108.695	1.19958e-22	7.55363e-21	down	ALMS1
THEM4	-1.3252	3.46047	108.656	1.21824e-22	7.64749e-21	down	THEM4
PCNX2	-1.19308	2.69824	108.617	1.23719e-22	7.74255e-21	down	PCNX2
BATF	2.205	4.07239	108.587	1.25205e-22	7.81152e-21	up	BATF
ABHD16A	1.18701	5.30478	108.444	1.32497e-22	8.24117e-21	up	ABHD16A
CASP4	1.63432	8.124	108.334	1.38359e-22	8.57952e-21	up	CASP4
ZNF248	-1.29163	2.08796	108.24	1.43633e-22	8.87947e-21	down	ZNF248
OSCAR	1.89275	6.43781	108.113	1.51011e-22	9.30733e-21	up	OSCAR
EEIG1	-1.3653	4.77243	107.855	1.67265e-22	1.0247e-20	down	EEIG1
LYRM7	-1.01085	3.55034	107.678	1.79434e-22	1.09267e-20	down	LYRM7
ZNF438	1.88934	5.68936	107.647	1.81653e-22	1.09959e-20	up	ZNF438
NFATC2	-1.36286	4.65704	107.592	1.85699e-22	1.12075e-20	down	NFATC2
LOC101929698	-1.47831	-0.570772	107.482	1.93962e-22	1.16716e-20	down	LOC101929698
CXCR5	-1.19596	3.39356	107.44	1.9725e-22	1.18344e-20	down	CXCR5
IDH1	1.0432	5.48234	107.334	2.05681e-22	1.22679e-20	up	IDH1
RDM1P5	-1.81419	-1.45225	107.284	2.09797e-22	1.24768e-20	down	RDM1P5
H2BC12	1.84048	6.42454	107.143	2.21921e-22	1.31593e-20	up	H2BC12
ZNF549	-1.24356	1.97694	107.002	2.34672e-22	1.3875e-20	down	ZNF549
FBXO6	2.43674	4.92151	106.946	2.39988e-22	1.41073e-20	up	FBXO6
GALNT12	-1.42116	1.11484	106.9	2.44387e-22	1.43244e-20	down	GALNT12
MPZ	1.50219	3.07095	106.749	2.5949e-22	1.51225e-20	up	MPZ
C11orf91	2.53024	-0.10822	106.602	2.75062e-22	1.59842e-20	up	C11orf91
SLC22A4	1.98872	5.53263	106.552	2.80647e-22	1.62302e-20	up	SLC22A4
KIF24	1.15367	4.04179	106.55	2.80891e-22	1.62302e-20	up	KIF24
CFAP44	-1.23036	1.96589	106.497	2.86829e-22	1.64797e-20	down	CFAP44
ZNF529	-1.11167	3.22981	106.285	3.1199e-22	1.78246e-20	down	ZNF529
COX5B	1.17066	5.10127	106.251	3.16232e-22	1.79809e-20	up	COX5B
ITGA7	4.36792	2.79256	106.249	3.16494e-22	1.79809e-20	up	ITGA7
SCCPDH	1.07661	3.43899	106.146	3.29825e-22	1.86861e-20	up	SCCPDH
MSRB2	1.83319	4.39067	105.947	3.56911e-22	2.01645e-20	up	MSRB2
NDUFA1	1.58598	4.1715	105.904	3.63129e-22	2.04589e-20	up	NDUFA1
SERPINB1	2.06919	9.065	105.846	3.71565e-22	2.08764e-20	up	SERPINB1
TRPM2	2.26215	4.69664	105.456	4.3413e-22	2.41911e-20	up	TRPM2
FLVCR2	1.82352	4.06237	105.416	4.41038e-22	2.45089e-20	up	FLVCR2
ZKSCAN8	-1.07603	4.295	105.363	4.50342e-22	2.48438e-20	down	ZKSCAN8
PROX2	-1.1027	1.39145	105.362	4.50542e-22	2.48438e-20	down	PROX2
DRAM1	1.71946	5.21164	105.361	4.50728e-22	2.48438e-20	up	DRAM1
LOC105374304	3.80743	3.30594	105.344	4.53927e-22	2.49525e-20	up	LOC105374304
MCF2L	-1.57772	0.284021	105.272	4.67026e-22	2.55886e-20	down	MCF2L
LINC00861	-1.40879	6.19323	105.262	4.68948e-22	2.55886e-20	down	LINC00861
ARL11	1.32366	5.39198	105.26	4.69273e-22	2.55886e-20	up	ARL11
GSEC	3.1467	3.96189	105.22	4.76883e-22	2.5934e-20	up	GSEC
BCL2A1	3.21846	7.01657	104.744	5.76419e-22	3.10976e-20	up	BCL2A1
ZNF528	-1.23783	1.66219	104.707	5.85073e-22	3.14809e-20	down	ZNF528
PLP2	1.80723	7.31872	104.572	6.1737e-22	3.31311e-20	up	PLP2
FAM153B	-1.72095	-0.0262027	104.562	6.19924e-22	3.31806e-20	down	FAM153B
H2AC7	2.27087	0.779769	104.54	6.25462e-22	3.33892e-20	up	H2AC7
ZNF331	-1.01392	2.52368	104.436	6.51928e-22	3.47109e-20	down	ZNF331
LRPAP1	1.41596	6.74311	104.404	6.60326e-22	3.50662e-20	up	LRPAP1
CHRM3-AS2	-1.86095	0.707874	104.396	6.62494e-22	3.50897e-20	down	CHRM3-AS2
CARD16	2.3268	6.24787	104.273	6.95666e-22	3.67511e-20	up	CARD16
RNF125	-1.03884	4.77237	104.181	7.21714e-22	3.79301e-20	down	RNF125
KIAA0930	1.33198	7.07657	104.024	7.68537e-22	4.01624e-20	up	KIAA0930
SEPHS2	1.06793	6.04322	104.019	7.70113e-22	4.01624e-20	up	SEPHS2
PGD	1.94662	9.37311	103.991	7.78891e-22	4.05163e-20	up	PGD
PTPRK	-1.79974	0.491761	103.977	7.83195e-22	4.06363e-20	down	PTPRK
CD96	-1.27518	5.41065	103.969	7.85669e-22	4.06609e-20	down	CD96
LGALS1	1.90382	6.40173	103.826	8.31942e-22	4.28376e-20	up	LGALS1
CCR4	-1.30009	3.22315	103.798	8.41367e-22	4.31768e-20	down	CCR4
ZNF827	-1.32536	1.62739	103.793	8.42774e-22	4.31768e-20	down	ZNF827
LSM1	1.03987	3.25638	103.743	8.60086e-22	4.3953e-20	up	LSM1
VPS9D1	2.0702	5.54335	103.632	8.98824e-22	4.57029e-20	up	VPS9D1
ZDHHC11B	-1.49921	0.101228	103.595	9.1223e-22	4.62689e-20	down	ZDHHC11B
GPM6B	-1.1639	0.392116	103.436	9.72091e-22	4.90604e-20	down	GPM6B
HAUS4	1.53045	5.98785	103.299	1.02704e-21	5.17055e-20	up	HAUS4
MYL6B	2.34322	3.60272	103.263	1.04184e-21	5.23209e-20	up	MYL6B
CTSZ	1.1381	8.12982	103.173	1.08012e-21	5.411e-20	up	CTSZ
GARRE1	-1.00302	2.93025	103.036	1.14117e-21	5.70277e-20	down	GARRE1
CD59	2.05005	7.17844	102.904	1.20288e-21	5.99642e-20	up	CD59
ABTB3	-1.24667	2.33684	102.895	1.20761e-21	6.00526e-20	down	ABTB3
ITGA6	-1.2038	4.59658	102.682	1.31512e-21	6.50808e-20	down	ITGA6
ZNF551	-1.20185	1.90504	102.673	1.31967e-21	6.51476e-20	down	ZNF551
UTP20	-1.13409	2.66367	102.666	1.32362e-21	6.5184e-20	down	UTP20
SLC39A1	1.10459	5.53959	102.621	1.34749e-21	6.61994e-20	up	SLC39A1
METTL9	1.9002	8.18274	102.602	1.35799e-21	6.65544e-20	up	METTL9
RAB20	2.47348	4.283	102.523	1.40131e-21	6.84054e-20	up	RAB20
ADM-DT	2.20433	1.03778	102.521	1.40248e-21	6.84054e-20	up	ADM-DT
NMI	1.44473	7.01487	102.477	1.42745e-21	6.94568e-20	up	NMI
SYNJ2BP	-1.02732	3.19628	102.38	1.48394e-21	7.18617e-20	down	SYNJ2BP
LOC101929599	2.52477	5.07112	102.32	1.52015e-21	7.34403e-20	up	LOC101929599
ZNF566	-1.19423	1.89267	102.259	1.55809e-21	7.50949e-20	down	ZNF566
ANXA1	1.688	8.39931	102.246	1.56614e-21	7.53041e-20	up	ANXA1
KIF5C	-1.40983	1.20356	101.997	1.73058e-21	8.3015e-20	down	KIF5C
CLEC4D	3.57379	6.15031	101.899	1.79996e-21	8.61397e-20	up	CLEC4D
HLF	-1.80364	-0.997636	101.781	1.88739e-21	9.0112e-20	down	HLF
SPTBN1	-1.09137	5.39133	101.696	1.95321e-21	9.30359e-20	down	SPTBN1
LOC107984026	-1.03256	1.6873	101.33	2.26203e-21	1.06499e-19	down	LOC107984026
SH3YL1	-1.31811	2.9425	101.228	2.35658e-21	1.10694e-19	down	SH3YL1
DNAH17	2.45936	5.39402	101.167	2.41584e-21	1.12959e-19	up	DNAH17
TMEM30B	-1.76523	-0.56288	101.138	2.44334e-21	1.13979e-19	down	TMEM30B
PAIP2B	-1.34226	1.30327	101.058	2.52341e-21	1.17364e-19	down	PAIP2B
PSMB3	1.40065	6.77048	101.042	2.5398e-21	1.1767e-19	up	PSMB3
LEF1-AS1	-1.56717	0.130556	100.862	2.7302e-21	1.26204e-19	down	LEF1-AS1
CTSA	1.34354	7.34532	100.687	2.92986e-21	1.3427e-19	up	CTSA
LDHA	1.62403	8.20052	100.686	2.93112e-21	1.3427e-19	up	LDHA
H4C8	2.21261	1.26916	100.659	2.96271e-21	1.35412e-19	up	H4C8
H2BP2	2.51549	1.90507	100.594	3.0414e-21	1.38697e-19	up	H2BP2
ZNF662	-1.85436	-0.438937	100.492	3.16843e-21	1.43845e-19	down	ZNF662
WWP1	-1.00239	4.028	100.471	3.19612e-21	1.44779e-19	down	WWP1
ATP5MF	1.31113	4.3612	100.391	3.30062e-21	1.49181e-19	up	ATP5MF
ZXDB	-1.13189	2.26105	100.374	3.32359e-21	1.49886e-19	down	ZXDB
LILRA6	1.91629	7.92363	100.34	3.36837e-21	1.51264e-19	up	LILRA6
ASGR2	2.02268	4.28352	100.287	3.44229e-21	1.54213e-19	up	ASGR2
NLRC3	-1.20444	4.96535	100.244	3.50124e-21	1.55824e-19	down	NLRC3
FCAR	2.29749	7.13159	100.217	3.53991e-21	1.57202e-19	up	FCAR
TARBP1	-1.22919	3.71341	100.149	3.63787e-21	1.612e-19	down	TARBP1
PRICKLE3	1.56517	5.557	99.9578	3.92981e-21	1.73757e-19	up	PRICKLE3
GUSBP4	-1.39354	0.705878	99.8563	4.09399e-21	1.79844e-19	down	GUSBP4
ALS2CL	-1.47623	1.36411	99.8186	4.15663e-21	1.82202e-19	down	ALS2CL
DBI	1.48999	4.60162	99.6074	4.52617e-21	1.97549e-19	up	DBI
ACAA1	1.23133	6.07463	99.5395	4.65185e-21	2.026e-19	up	ACAA1
TMEM11	1.14341	3.84859	99.5062	4.71469e-21	2.04898e-19	up	TMEM11
SPEF2	-1.44927	1.1702	99.3509	5.01955e-21	2.17682e-19	down	SPEF2
LOC112267942	2.1611	4.78369	99.304	5.11558e-21	2.21374e-19	up	LOC112267942
B2M	1.29453	12.3711	99.2542	5.21941e-21	2.25387e-19	up	B2M
TXNDC17	1.05782	3.16157	99.2441	5.24062e-21	2.25824e-19	up	TXNDC17
CREG1	1.58735	6.86626	99.2122	5.30869e-21	2.28274e-19	up	CREG1
IL18	1.19377	2.81705	99.1291	5.48969e-21	2.35559e-19	up	IL18
SOCS3	3.11154	7.2779	99.103	5.54776e-21	2.37549e-19	up	SOCS3
AGTRAP	2.18801	6.81908	99.0962	5.56317e-21	2.37709e-19	up	AGTRAP
GADD45B	1.77031	6.26542	98.993	5.7999e-21	2.46601e-19	up	GADD45B
PSMA4	1.50738	5.81114	98.9897	5.80766e-21	2.46601e-19	up	PSMA4
P2RY10	-1.55129	4.15316	98.8233	6.21138e-21	2.6156e-19	down	P2RY10
CARD6	1.53879	5.66192	98.7963	6.27937e-21	2.63876e-19	up	CARD6
FAM131B-AS2	1.64549	3.42583	98.6291	6.71842e-21	2.81375e-19	up	FAM131B-AS2
CLIC5	-1.431	0.829916	98.6273	6.72344e-21	2.81375e-19	down	CLIC5
CASP5	2.89739	4.89307	98.5203	7.02045e-21	2.926e-19	up	CASP5
TCN2	2.60897	4.01871	98.4586	7.19781e-21	2.99379e-19	up	TCN2
NOL3	1.54011	1.66664	98.3889	7.4035e-21	3.07306e-19	up	NOL3
LINC02967	3.41571	4.41614	98.3736	7.44935e-21	3.08579e-19	up	LINC02967
CHCHD1	1.07001	3.21536	98.1881	8.02992e-21	3.31952e-19	up	CHCHD1
RNF135	1.02747	5.14685	97.9042	9.00749e-21	3.68618e-19	up	RNF135
MAD2L1BP	1.05628	3.91712	97.7854	9.45149e-21	3.86012e-19	up	MAD2L1BP
SLMO2-ATP5E	1.49159	5.76392	97.6584	9.94995e-21	4.05555e-19	up	SLMO2-ATP5E
ATP5PF	1.32594	3.80024	97.5923	1.02202e-20	4.15738e-19	up	ATP5PF
PRPF40B	-1.0852	1.54244	97.3991	1.10524e-20	4.46021e-19	down	PRPF40B
CLEC5A	2.77995	4.62489	97.38	1.11383e-20	4.48597e-19	up	CLEC5A
PWAR5	-1.84276	-0.602099	97.3212	1.14067e-20	4.58501e-19	down	PWAR5
CYBC1	1.48609	7.80257	97.2587	1.16996e-20	4.675e-19	up	CYBC1
PLIN3	1.60239	6.57448	97.1255	1.23485e-20	4.915e-19	up	PLIN3
TNIK	-1.09579	4.18789	97.1065	1.24439e-20	4.94328e-19	down	TNIK
NDUFA2	1.15045	3.48425	97.0758	1.26e-20	4.98584e-19	up	NDUFA2
TTC3-AS1	-1.10882	-0.0667705	97.0377	1.27958e-20	5.05348e-19	down	TTC3-AS1
PTPN13	-1.49611	0.697647	97.0017	1.2984e-20	5.11786e-19	down	PTPN13
GCSAM	-1.34122	2.34504	96.9151	1.34486e-20	5.29075e-19	down	GCSAM
GADD45A	2.95249	4.67411	96.908	1.34874e-20	5.29577e-19	up	GADD45A
UBE2F-SCLY	1.11002	3.94471	96.8991	1.35361e-20	5.30466e-19	up	UBE2F-SCLY
SRP14	1.1534	5.78652	96.892	1.35752e-20	5.30973e-19	up	SRP14
FLOT1	2.0336	8.51201	96.8741	1.36739e-20	5.33806e-19	up	FLOT1
MRPL33	1.02077	3.43203	96.8216	1.39686e-20	5.44266e-19	up	MRPL33
SLPI	3.16942	5.18115	96.8051	1.40623e-20	5.46872e-19	up	SLPI
MFSD13A	1.02334	4.79973	96.7852	1.41761e-20	5.49791e-19	up	MFSD13A
GOLGA8B	-1.39727	4.87595	96.7825	1.41915e-20	5.49791e-19	down	GOLGA8B
GNA15	1.53533	4.44865	96.6543	1.49494e-20	5.76955e-19	up	GNA15
LOC105370969	2.40847	1.81185	96.6342	1.50721e-20	5.80589e-19	up	LOC105370969
GAS6	2.05038	2.93543	96.4964	1.59395e-20	6.11685e-19	up	GAS6
LOC105371873	3.08254	0.875736	96.4239	1.64153e-20	6.28759e-19	up	LOC105371873
BRI3	1.6629	7.08666	96.3799	1.67115e-20	6.38901e-19	up	BRI3
ITK	-1.34663	5.56482	96.117	1.8595e-20	7.08248e-19	down	ITK
FKTN	-1.12276	2.553	96.1012	1.87145e-20	7.11464e-19	down	FKTN
LOC105375035	2.29393	1.13426	96.077	1.88998e-20	7.17168e-19	up	LOC105375035
FAM151B	1.71224	2.54994	96.0409	1.91784e-20	7.26388e-19	up	FAM151B
LMO2	1.13853	6.02013	95.9908	1.95737e-20	7.39979e-19	up	LMO2
SPIN3	-1.20822	1.82781	95.8754	2.05135e-20	7.74072e-19	down	SPIN3
SLC1A3	4.4252	3.42366	95.7961	2.11854e-20	7.96469e-19	up	SLC1A3
PRDM11	-1.28331	0.670686	95.7249	2.18076e-20	8.1835e-19	down	PRDM11
ILK	1.02598	6.06104	95.641	2.25648e-20	8.45203e-19	up	ILK
FKBP1B	1.35428	3.28881	95.62	2.27584e-20	8.50887e-19	up	FKBP1B
RNF181	1.31517	4.31816	95.3514	2.53869e-20	9.47419e-19	up	RNF181
DOCK10	-1.07348	5.61616	95.1867	2.71476e-20	1.00758e-18	down	DOCK10
LOC105375769	3.30906	1.31103	95.043	2.8783e-20	1.06633e-18	up	LOC105375769
MRTFB	-1.39555	1.85383	94.993	2.93747e-20	1.08627e-18	down	MRTFB
SNX3	1.82462	7.86147	94.8695	3.08908e-20	1.13409e-18	up	SNX3
CCDC71L	1.54849	5.2746	94.8406	3.12568e-20	1.14546e-18	up	CCDC71L
LOC105375924	2.60124	1.34956	94.797	3.18175e-20	1.16391e-18	up	LOC105375924
GM2A	1.43131	6.33162	94.685	3.33031e-20	1.21607e-18	up	GM2A
NT5E	-1.74899	1.94038	94.6727	3.34699e-20	1.21997e-18	down	NT5E
H4C4	2.56924	1.26762	94.6324	3.40252e-20	1.23799e-18	up	H4C4
ABCB1	-1.41848	2.36983	94.624	3.41416e-20	1.24001e-18	down	ABCB1
OSM	2.7836	3.19561	94.3955	3.74759e-20	1.35386e-18	up	OSM
LOC107986300	-2.22661	-1.38384	94.3725	3.78286e-20	1.36418e-18	down	LOC107986300
GOLGA6L9	-1.39862	0.641862	94.3483	3.82042e-20	1.37528e-18	down	GOLGA6L9
ST3GAL4	2.3487	5.84923	94.2626	3.95625e-20	1.41916e-18	up	ST3GAL4
GALNT13	-2.4578	-2.49317	94.2413	3.99087e-20	1.4259e-18	down	GALNT13
TPST2	1.10141	6.57173	94.2382	3.99587e-20	1.4259e-18	up	TPST2
PLCG1	-1.15685	5.04367	94.0177	4.37206e-20	1.5546e-18	down	PLCG1
GUSBP15	1.81435	3.81984	94.0131	4.38026e-20	1.5548e-18	up	GUSBP15
NMRAL2P	3.18181	-0.126914	93.9814	4.4373e-20	1.5723e-18	up	NMRAL2P
CHCHD2	1.07679	5.82674	93.9459	4.50207e-20	1.59248e-18	up	CHCHD2
H2AC20	3.74791	2.00494	93.8596	4.66358e-20	1.64675e-18	up	H2AC20
LRATD2	-1.3593	2.09747	93.8316	4.71713e-20	1.66277e-18	down	LRATD2
RORA	-1.55291	4.85567	93.7459	4.88521e-20	1.71904e-18	down	RORA
DUSP13	3.52496	0.918566	93.6124	5.15909e-20	1.80915e-18	up	DUSP13
CACNA1E	2.60622	4.14168	93.4095	5.60492e-20	1.96211e-18	up	CACNA1E
ITGAM	1.59604	8.57274	93.3771	5.67955e-20	1.98141e-18	up	ITGAM
ZNF573	-1.33632	0.154404	93.3453	5.75387e-20	2.0039e-18	down	ZNF573
AP5B1	1.48696	7.98249	93.2596	5.95907e-20	2.07182e-18	up	AP5B1
GOLGA8A	-1.35917	4.83604	93.1505	6.23093e-20	2.16264e-18	down	GOLGA8A
TAF10	1.02466	6.79959	93.1022	6.35531e-20	2.20205e-18	up	TAF10
SATB1-AS1	-1.63341	-0.0698991	93.0259	6.55685e-20	2.26802e-18	down	SATB1-AS1
DPP4	-1.41023	3.57474	93.0189	6.57549e-20	2.27061e-18	down	DPP4
SALL2	-1.56427	-0.255496	92.953	6.75527e-20	2.32874e-18	down	SALL2
APOBEC3B-AS1	1.73663	3.53448	92.8884	6.93613e-20	2.38704e-18	up	APOBEC3B-AS1
COX17	1.1405	2.4612	92.8775	6.96715e-20	2.39366e-18	up	COX17
STOM	2.15852	8.16981	92.8464	7.05644e-20	2.42025e-18	up	STOM
TTC28	-1.24894	0.216105	92.8057	7.17497e-20	2.44978e-18	down	TTC28
E2F2	1.80182	4.68072	92.8044	7.17867e-20	2.44978e-18	up	E2F2
DNTTIP1	1.08139	5.24914	92.787	7.22987e-20	2.459e-18	up	DNTTIP1
LOC105377587	2.75593	2.49779	92.7784	7.25557e-20	2.46362e-18	up	LOC105377587
LOC105374985	1.73676	3.29552	92.7448	7.3559e-20	2.48938e-18	up	LOC105374985
PTPDC1	-1.31665	0.139271	92.6048	7.78986e-20	2.62749e-18	down	PTPDC1
ATM	-1.16684	6.82907	92.5868	7.84742e-20	2.63816e-18	down	ATM
SIL1	1.32052	3.46601	92.562	7.92746e-20	2.66067e-18	up	SIL1
CD53	1.04216	9.66256	92.5036	8.11941e-20	2.7206e-18	up	CD53
GALNT14	3.12238	3.90644	92.4184	8.40768e-20	2.80794e-18	up	GALNT14
TNFAIP8L3	6.09383	0.782192	92.4092	8.43956e-20	2.81397e-18	up	TNFAIP8L3
RBX1	1.43887	4.31788	92.341	8.67857e-20	2.88893e-18	up	RBX1
BMX	2.83328	4.72178	92.2377	9.05353e-20	3.00882e-18	up	BMX
LOC105373204	-1.75905	-0.529818	92.2259	9.09765e-20	3.01855e-18	down	LOC105373204
SLC2A3	1.91918	9.48309	92.1829	9.25912e-20	3.06214e-18	up	SLC2A3
LYRM1	1.31226	5.03931	92.0566	9.75121e-20	3.20852e-18	up	LYRM1
ATP5F1C	1.13304	5.14234	92.0255	9.87635e-20	3.2347e-18	up	ATP5F1C
NECTIN3	-1.64442	-0.0633404	91.9748	1.00839e-19	3.29736e-18	down	NECTIN3
PRSS35	-2.42193	-2.07	91.9104	1.03535e-19	3.3801e-18	down	PRSS35
LOC105371312	-1.13471	-0.398037	91.8945	1.04211e-19	3.39672e-18	down	LOC105371312
MTHFD2	1.25293	4.95841	91.8871	1.04528e-19	3.40159e-18	up	MTHFD2
LOC112268237	3.19725	1.72292	91.8271	1.07133e-19	3.4697e-18	up	LOC112268237
IFNGR2	1.20144	7.86999	91.7512	1.10522e-19	3.57378e-18	up	IFNGR2
H2BC18	2.08135	1.91231	91.6214	1.16563e-19	3.76312e-18	up	H2BC18
PASK	-1.23128	3.09322	91.5791	1.18605e-19	3.82299e-18	down	PASK
ZNF709	-1.21213	0.68752	91.3491	1.30347e-19	4.19483e-18	down	ZNF709
CSTB	1.22945	6.02839	91.2593	1.35244e-19	4.34554e-18	up	CSTB
QPCT	1.64051	7.57825	91.0552	1.47068e-19	4.71185e-18	up	QPCT
LOC112267855	1.83111	3.37842	91.0545	1.47108e-19	4.71185e-18	up	LOC112267855
JMY	-1.22507	3.01685	90.9626	1.52772e-19	4.88558e-18	down	JMY
ZMYND11	-1.18812	4.01255	90.9556	1.5321e-19	4.89188e-18	down	ZMYND11
ARL8A	1.30444	5.98703	90.6124	1.76419e-19	5.60921e-18	up	ARL8A
NDUFB6	1.05744	3.92583	90.5827	1.7859e-19	5.66669e-18	up	NDUFB6
CBLL1-AS1	1.32186	1.46933	90.5565	1.80526e-19	5.71919e-18	up	CBLL1-AS1
PRAG1	-1.12747	2.37937	90.4029	1.923e-19	6.05446e-18	down	PRAG1
MRPS31P5	-1.14264	1.54027	90.341	1.97257e-19	6.20095e-18	down	MRPS31P5
GPR37L1	1.25297	2.02656	90.3203	1.98939e-19	6.24417e-18	up	GPR37L1
RNASE1	3.77967	1.55883	90.294	2.01111e-19	6.30263e-18	up	RNASE1
CKAP4	1.87083	7.28598	90.0785	2.19762e-19	6.87221e-18	up	CKAP4
ZBTB46	-1.04269	1.16997	90.0745	2.20121e-19	6.87221e-18	down	ZBTB46
NUPR1	4.1477	-0.278722	90.0523	2.22139e-19	6.90838e-18	up	NUPR1
SPATC1	3.75767	2.35729	89.972	2.29608e-19	7.12975e-18	up	SPATC1
RALGAPA1	-1.08585	3.33737	89.8422	2.42219e-19	7.49848e-18	down	RALGAPA1
POLE4	1.30592	2.86586	89.806	2.45854e-19	7.58789e-18	up	POLE4
ARHGEF35-AS1	-1.18869	-0.23632	89.7596	2.50597e-19	7.72257e-18	down	ARHGEF35-AS1
SPOCK2	-1.15953	6.43591	89.7397	2.52667e-19	7.77457e-18	down	SPOCK2
GPER1	3.12151	1.61537	89.7338	2.53277e-19	7.78157e-18	up	GPER1
FBXO32	-1.10356	2.93324	89.7201	2.54709e-19	7.81376e-18	down	FBXO32
LAMTOR1	1.47625	6.10657	89.6411	2.63142e-19	8.04743e-18	up	LAMTOR1
PHLDB2	-1.5742	1.00013	89.6156	2.65916e-19	8.10863e-18	down	PHLDB2
ZDHHC19	5.95816	4.47097	89.6055	2.67023e-19	8.13021e-18	up	ZDHHC19
LTB4R	1.37139	6.62057	89.4839	2.80744e-19	8.50977e-18	up	LTB4R
STK16	1.21229	4.20701	89.468	2.82601e-19	8.55332e-18	up	STK16
PRDX1	1.04469	5.40276	89.2545	3.086e-19	9.31247e-18	up	PRDX1
TOMM40L	1.13294	3.32902	89.2259	3.12261e-19	9.40902e-18	up	TOMM40L
NTNG2	1.99237	6.11676	89.1586	3.21054e-19	9.65964e-18	up	NTNG2
C1QA	3.4775	3.83983	89.0811	3.31474e-19	9.95841e-18	up	C1QA
MAPK14	1.80367	8.73104	89.0075	3.41696e-19	1.02504e-17	up	MAPK14
LOC105374545	3.94468	1.16435	88.9913	3.43986e-19	1.03039e-17	up	LOC105374545
NDUFB1	1.17361	3.20022	88.9798	3.45632e-19	1.03379e-17	up	NDUFB1
STYXL1	1.22252	4.3345	88.9756	3.46233e-19	1.03407e-17	up	STYXL1
PSTPIP2	2.31048	7.28326	88.9466	3.50395e-19	1.04497e-17	up	PSTPIP2
CHMP5	1.67845	5.54864	88.8858	3.59304e-19	1.0684e-17	up	CHMP5
GPRASP3	-1.18316	-0.994954	88.6785	3.91395e-19	1.15875e-17	down	GPRASP3
CNGB1	3.06773	0.0275369	88.5072	4.20087e-19	1.24008e-17	up	CNGB1
MIR3945HG	2.71613	4.79164	88.498	4.21686e-19	1.24258e-17	up	MIR3945HG
SYTL2	-1.33915	3.4473	88.4954	4.22156e-19	1.24258e-17	down	SYTL2
IFT20	1.01785	2.7524	88.4866	4.23689e-19	1.24529e-17	up	IFT20
TIMP1	1.91679	6.5632	88.4086	4.37564e-19	1.28422e-17	up	TIMP1
LOC105379749	-1.45022	-0.796137	88.3591	4.46606e-19	1.3051e-17	down	LOC105379749
DHRS7B	1.05006	3.04675	88.2611	4.65067e-19	1.3571e-17	up	DHRS7B
SEMA5A	-2.02085	-1.42587	88.161	4.84714e-19	1.41241e-17	down	SEMA5A
KCNE1	2.48857	3.27965	88.1397	4.88995e-19	1.42284e-17	up	KCNE1
MARCO	2.31258	4.26795	88.0255	5.12645e-19	1.48953e-17	up	MARCO
SNX29P2	-1.27764	0.940238	88.0217	5.13443e-19	1.48972e-17	down	SNX29P2
RRN3P1	-1.11182	1.93864	87.9178	5.35986e-19	1.5507e-17	down	RRN3P1
MTX1	1.25652	4.40484	87.8222	5.576e-19	1.60866e-17	up	MTX1
C4orf3	1.27511	7.14622	87.8094	5.60559e-19	1.6149e-17	up	C4orf3
RTKN2	-1.6017	1.79252	87.7652	5.70913e-19	1.6424e-17	down	RTKN2
SIRPG-AS1	-1.80017	-1.27266	87.7009	5.86309e-19	1.68194e-17	down	SIRPG-AS1
IL27	2.20503	1.17937	87.6747	5.92701e-19	1.69788e-17	up	IL27
LINC02648	-1.43613	1.12532	87.6328	6.0306e-19	1.72307e-17	down	LINC02648
VPS9D1-AS1	1.69014	3.51467	87.55	6.24083e-19	1.77649e-17	up	VPS9D1-AS1
LOC112267940	2.29919	3.18748	87.5484	6.2451e-19	1.77649e-17	up	LOC112267940
JAK3	1.47593	8.44741	87.4615	6.47363e-19	1.83893e-17	up	JAK3
CD3G	-1.39111	4.21817	87.3367	6.81704e-19	1.93378e-17	down	CD3G
BCL2	-1.27504	4.748	87.2794	6.98073e-19	1.97196e-17	down	BCL2
VNN1	3.28703	7.36849	87.1686	7.30858e-19	2.05601e-17	up	VNN1
CTSH	1.25264	6.69016	87.1206	7.4555e-19	2.09444e-17	up	CTSH
ATP5MG	1.07373	5.53276	87.0024	7.82967e-19	2.19349e-17	up	ATP5MG
RETN	4.3609	4.24044	86.9631	7.95837e-19	2.22342e-17	up	RETN
ZBTB10	-1.30597	1.8778	86.9433	8.02396e-19	2.23733e-17	down	ZBTB10
CEACAM1	3.02412	7.43831	86.6998	8.87626e-19	2.45804e-17	up	CEACAM1
LOC102723415	-1.55057	-0.628965	86.698	8.88272e-19	2.45804e-17	down	LOC102723415
MAP2K6	1.79511	6.00218	86.6761	8.96382e-19	2.47711e-17	up	MAP2K6
PLTP	1.49554	3.54967	86.6559	9.03925e-19	2.49456e-17	up	PLTP
BCKDHB	-1.19624	1.71069	86.5695	9.36922e-19	2.58212e-17	down	BCKDHB
ATOX1	1.39912	2.77705	86.562	9.39852e-19	2.58669e-17	up	ATOX1
LBH	-1.18229	5.64573	86.5153	9.58203e-19	2.63363e-17	down	LBH
IKZF2	-1.73848	2.87675	86.5043	9.62607e-19	2.63861e-17	down	IKZF2
ZFYVE9	-1.04087	1.6425	86.475	9.74381e-19	2.66729e-17	down	ZFYVE9
TCTN2	-1.43393	0.344832	86.4434	9.87252e-19	2.69889e-17	down	TCTN2
SAMSN1	2.8049	7.08299	86.4033	1.00379e-18	2.73827e-17	up	SAMSN1
GRINA	2.33281	8.32931	86.3884	1.01002e-18	2.74743e-17	up	GRINA
NEDD8	1.26043	5.01174	86.3875	1.01041e-18	2.74743e-17	up	NEDD8
MAD2L2	1.42641	3.907	86.3802	1.01348e-18	2.75209e-17	up	MAD2L2
CDHR3	-1.48785	-0.319079	86.3746	1.01582e-18	2.75219e-17	down	CDHR3
ISM1	-1.92649	-0.945055	86.3584	1.02269e-18	2.76602e-17	down	ISM1
RGS19	1.30545	6.99246	86.2911	1.05165e-18	2.84056e-17	up	RGS19
CACNA2D2	-1.23668	1.5791	86.0885	1.14394e-18	3.08166e-17	down	CACNA2D2
LOC112267939	2.29594	3.21391	86.0573	1.15883e-18	3.11766e-17	up	LOC112267939
C3orf52	-1.36371	0.191733	85.9892	1.19208e-18	3.20258e-17	down	C3orf52
STARD9	-1.22269	1.6834	85.9804	1.19646e-18	3.20617e-17	down	STARD9
SRGN	1.61709	10.6855	85.8866	1.24402e-18	3.32923e-17	up	SRGN
SEC61B	1.16911	4.98031	85.881	1.24692e-18	3.33259e-17	up	SEC61B
ADAM22	-1.27464	0.853798	85.8439	1.26627e-18	3.37988e-17	down	ADAM22
NR2E1	4.98459	-0.183568	85.7931	1.29331e-18	3.44753e-17	up	NR2E1
APMAP	1.51618	8.10045	85.6753	1.35819e-18	3.61574e-17	up	APMAP
MSRB1	1.96837	8.63699	85.6589	1.36747e-18	3.63568e-17	up	MSRB1
CCRL2	2.27509	3.55659	85.6193	1.39018e-18	3.69124e-17	up	CCRL2
FBXL5	1.16699	8.82031	85.6067	1.39747e-18	3.7025e-17	up	FBXL5
TADA3	1.02715	6.3399	85.6057	1.39806e-18	3.7025e-17	up	TADA3
DGKE	-1.10702	3.04493	85.5765	1.41511e-18	3.73791e-17	down	DGKE
FGR	1.51205	9.46971	85.5719	1.41784e-18	3.74026e-17	up	FGR
ADAM23	-1.77388	-0.208752	85.5403	1.43657e-18	3.78477e-17	down	ADAM23
NAIP	2.1044	7.88517	85.5156	1.45143e-18	3.81896e-17	up	NAIP
EFCAB2	2.28458	4.35117	85.3965	1.52512e-18	3.99736e-17	up	EFCAB2
TBC1D8	1.8664	5.74966	85.3918	1.52813e-18	4.00007e-17	up	TBC1D8
LINC01238	-1.68361	0.079438	85.2983	1.58866e-18	4.15319e-17	down	LINC01238
CD28	-1.36338	4.57539	85.2902	1.59406e-18	4.16196e-17	down	CD28
ZNHIT6	-1.07816	3.08569	85.2737	1.60501e-18	4.18155e-17	down	ZNHIT6
VAMP5	2.5495	4.37275	85.2727	1.60568e-18	4.18155e-17	up	VAMP5
IFI27L2	1.72563	2.19627	85.2474	1.62272e-18	4.22052e-17	up	IFI27L2
HPCAL4	-1.63035	1.15618	85.1138	1.71542e-18	4.45025e-17	down	HPCAL4
CTSD	1.73423	8.94069	85.0079	1.79279e-18	4.63913e-17	up	CTSD
IFITM3	2.76594	10.0217	84.9431	1.84179e-18	4.74781e-17	up	IFITM3
AGPAT2	1.72453	4.77338	84.939	1.84495e-18	4.74992e-17	up	AGPAT2
CDKN2C	1.72067	2.43422	84.7645	1.98396e-18	5.08208e-17	up	CDKN2C
BLVRA	1.4161	4.74368	84.6329	2.0958e-18	5.36005e-17	up	BLVRA
PGS1	1.79491	7.58085	84.6306	2.09774e-18	5.36005e-17	up	PGS1
DCAF17	-1.10467	3.12933	84.6079	2.11767e-18	5.40417e-17	down	DCAF17
PFKFB3	2.78142	7.82523	84.5508	2.16872e-18	5.52059e-17	up	PFKFB3
ADAT2	-1.26359	2.61543	84.5418	2.17686e-18	5.53189e-17	down	ADAT2
LOC107986153	1.48617	2.94791	84.5399	2.1786e-18	5.53189e-17	up	LOC107986153
BMS1P2-AGAP9	-1.03847	0.896278	84.5108	2.20519e-18	5.58547e-17	down	BMS1P2-AGAP9
LAT2	1.20893	7.80184	84.4984	2.21658e-18	5.60734e-17	up	LAT2
MOB3C	1.12371	5.14476	84.3903	2.3187e-18	5.85113e-17	up	MOB3C
LINC01215	-1.23069	2.50227	84.347	2.36091e-18	5.94124e-17	down	LINC01215
LOC105371461	2.09234	3.27323	84.3447	2.36318e-18	5.94124e-17	up	LOC105371461
CR2	-1.56588	1.62627	84.2002	2.50993e-18	6.28688e-17	down	CR2
LINC00671	2.58137	2.44974	84.1604	2.55202e-18	6.38445e-17	up	LINC00671
ZDHHC3	1.04634	6.41858	84.0933	2.62439e-18	6.55744e-17	up	ZDHHC3
NDUFC2-KCTD14	1.27181	3.19413	84.06	2.66112e-18	6.64104e-17	up	NDUFC2-KCTD14
TMEM220	-1.04133	1.96562	84.0222	2.70338e-18	6.73823e-17	down	TMEM220
SIGLEC17P	-1.41257	1.08939	83.9452	2.79165e-18	6.94125e-17	down	SIGLEC17P
XPO4	-1.01179	3.82872	83.9286	2.81108e-18	6.98102e-17	down	XPO4
APBB1	-1.16749	3.11792	83.9034	2.84082e-18	7.0411e-17	down	APBB1
PHTF1	1.52095	4.66634	83.9022	2.8422e-18	7.0411e-17	up	PHTF1
TFE3	1.12879	7.19297	83.8955	2.8502e-18	7.05233e-17	up	TFE3
LMAN2	1.11753	6.65419	83.8789	2.86999e-18	7.09267e-17	up	LMAN2
COX6B1	1.16898	6.03687	83.6855	3.11129e-18	7.67969e-17	up	COX6B1
TUBA1B	1.03821	7.74082	83.6555	3.15047e-18	7.75756e-17	up	TUBA1B
H2AJ	1.34529	4.28016	83.6038	3.21919e-18	7.91719e-17	up	H2AJ
FFAR3	3.63837	2.19545	83.5755	3.25748e-18	8.00167e-17	up	FFAR3
CAP1	1.04011	9.63943	83.5443	3.30023e-18	8.09692e-17	up	CAP1
LOC93622	-1.02754	2.61518	83.4922	3.37281e-18	8.265e-17	down	LOC93622
LOC441081	2.73409	6.2258	83.4657	3.41031e-18	8.34686e-17	up	LOC441081
SYN2	2.98351	0.645312	83.4548	3.42597e-18	8.37511e-17	up	SYN2
SELL	1.42953	11.6827	83.4091	3.49201e-18	8.50753e-17	up	SELL
DAD1	1.12677	5.65594	83.3187	3.6264e-18	8.80158e-17	up	DAD1
UQCR11	1.27374	4.8583	83.3149	3.63207e-18	8.80485e-17	up	UQCR11
LOC107985513	3.38392	-1.50294	83.2493	3.73301e-18	9.03878e-17	up	LOC107985513
HSPA6	1.78268	7.80925	83.1915	3.82434e-18	9.24891e-17	up	HSPA6
LOC105374102	1.8722	2.99713	83.1787	3.84484e-18	9.28743e-17	up	LOC105374102
ZNF280B	-1.43481	-0.0297794	83.1664	3.86469e-18	9.32432e-17	down	ZNF280B
CEP126	-1.45427	0.936972	83.137	3.91249e-18	9.42845e-17	down	CEP126
PLAC8	1.9656	7.46523	83.1159	3.94711e-18	9.50062e-17	up	PLAC8
DIP2C	-1.41806	0.281508	83.103	3.96846e-18	9.54073e-17	down	DIP2C
SLC38A1	-1.28542	6.16405	83.0173	4.11312e-18	9.86053e-17	down	SLC38A1
ACOX2	2.88958	-0.616195	83.0157	4.11603e-18	9.86053e-17	up	ACOX2
UQCR10	1.13711	4.07378	82.9875	4.16479e-18	9.95389e-17	up	UQCR10
PSMB8	1.16829	7.26627	82.9784	4.18069e-18	9.98018e-17	up	PSMB8
TOR4A	1.45088	4.98003	82.9364	4.25468e-18	1.01216e-16	up	TOR4A
TTC39B	-1.05666	3.2606	82.9363	4.25487e-18	1.01216e-16	down	TTC39B
TTC12	-1.09131	1.7436	82.8924	4.33371e-18	1.02971e-16	down	TTC12
TTC36-AS1	-1.08262	-0.0587994	82.7854	4.53206e-18	1.07183e-16	down	TTC36-AS1
G0S2	3.74125	2.76776	82.764	4.57279e-18	1.08021e-16	up	G0S2
TNFSF10	1.65566	8.60921	82.7294	4.63952e-18	1.0947e-16	up	TNFSF10
NFE2	1.88933	8.74225	82.7124	4.67257e-18	1.10122e-16	up	NFE2
CTSL	1.98118	4.04393	82.6975	4.70176e-18	1.10682e-16	up	CTSL
SIGLEC5	1.74918	7.98888	82.645	4.80638e-18	1.13014e-16	up	SIGLEC5
TRBJ1-4	-1.46229	-0.115407	82.35	5.43791e-18	1.27275e-16	down	TRBJ1-4
FAM226A	-1.33415	-1.00819	82.3456	5.44797e-18	1.27363e-16	down	FAM226A
TC2N	-1.3992	4.9647	82.3224	5.50119e-18	1.2846e-16	down	TC2N
EXPH5	-1.81113	-0.698567	82.2699	5.62342e-18	1.31014e-16	down	EXPH5
FLOT2	1.87288	9.42094	82.2544	5.66021e-18	1.3172e-16	up	FLOT2
MIIP	1.775	4.677	82.1794	5.84063e-18	1.35763e-16	up	MIIP
ATP8B2	-1.09817	5.22858	82.1661	5.87333e-18	1.36367e-16	down	ATP8B2
TRIM25	1.48804	8.6659	82.1103	6.0123e-18	1.39422e-16	up	TRIM25
LOC100996318	2.48951	3.72516	82.1078	6.01861e-18	1.39422e-16	up	LOC100996318
MIEN1	1.13165	4.52439	82.1038	6.02862e-18	1.39495e-16	up	MIEN1
NAA38	1.34649	2.93597	82.0808	6.08704e-18	1.40527e-16	up	NAA38
CDKN2D	1.69779	6.43679	82.017	6.25211e-18	1.44174e-16	up	CDKN2D
ANKS6	-1.10194	1.37973	81.9411	6.45413e-18	1.48664e-16	down	ANKS6
AIF1	1.67165	7.19976	81.9042	6.55467e-18	1.50809e-16	up	AIF1
EXT1	1.29772	4.22741	81.8661	6.66005e-18	1.53035e-16	up	EXT1
ACVRL1	1.96057	0.781398	81.8638	6.66647e-18	1.53035e-16	up	ACVRL1
CTSB	1.24188	8.99436	81.7568	6.97249e-18	1.5952e-16	up	CTSB
LOC101929216	-1.67761	-0.301806	81.7386	7.02587e-18	1.60561e-16	down	LOC101929216
CYP19A1	6.84971	1.73454	81.7175	7.08821e-18	1.61804e-16	up	CYP19A1
SLC30A4	-1.28591	1.30469	81.699	7.14335e-18	1.62879e-16	down	SLC30A4
DHRS13	2.02073	5.68172	81.6003	7.44531e-18	1.69385e-16	up	DHRS13
ARL10	-1.14301	2.46825	81.5539	7.59166e-18	1.72137e-16	down	ARL10
MORN3	-1.08634	1.27182	81.531	7.66511e-18	1.73609e-16	down	MORN3
FADD	1.09717	4.80682	81.5108	7.73016e-18	1.74887e-16	up	FADD
DOK1	1.1933	5.2465	81.4913	7.7937e-18	1.76129e-16	up	DOK1
NCF4	1.66853	8.46747	81.4533	7.91903e-18	1.78564e-16	up	NCF4
LSM10	1.08272	4.54448	81.4452	7.94589e-18	1.78972e-16	up	LSM10
SORT1	1.89419	6.95465	81.4424	7.95517e-18	1.78982e-16	up	SORT1
DYSF	1.98101	9.35754	81.4214	8.02562e-18	1.7997e-16	up	DYSF
ANK3	-1.41105	2.05638	81.3123	8.40157e-18	1.87986e-16	down	ANK3
USP13	-1.09339	1.46516	81.2813	8.51173e-18	1.90033e-16	down	USP13
SMCO4	1.55556	4.14605	81.2639	8.5742e-18	1.91218e-16	up	SMCO4
IL18RAP	2.38622	7.7997	81.2354	8.67741e-18	1.93308e-16	up	IL18RAP
JPT1	1.30356	6.71249	81.212	8.7629e-18	1.94999e-16	up	JPT1
PLGRKT	1.10041	2.86887	81.1633	8.94384e-18	1.98807e-16	up	PLGRKT
CACNB4	-1.57781	0.925116	81.1397	9.0329e-18	2.005e-16	down	CACNB4
SYNPO	-1.43683	0.450202	81.1379	9.03969e-18	2.005e-16	down	SYNPO
TYROBP	1.70316	8.61457	81.1292	9.07279e-18	2.01015e-16	up	TYROBP
ZNF607	-1.14992	0.784298	81.0977	9.19375e-18	2.03252e-16	down	ZNF607
PARP15	-1.26225	4.88965	81.0824	9.25302e-18	2.0434e-16	down	PARP15
S100A11	1.82498	9.90957	81.0723	9.29211e-18	2.04981e-16	up	S100A11
ZNF540	-1.44969	1.46096	81.0625	9.33055e-18	2.05606e-16	down	ZNF540
ZNF568	-1.0627	1.31393	81.0238	9.48344e-18	2.08749e-16	down	ZNF568
RILPL2	1.06552	6.20569	81.0077	9.54795e-18	2.09715e-16	up	RILPL2
FAM226B	-1.32707	-1.05503	80.9825	9.6495e-18	2.11716e-16	down	FAM226B
AGAP1	-1.42893	0.924171	80.9438	9.80759e-18	2.14953e-16	down	AGAP1
SERTAD3	1.00898	4.2648	80.9378	9.83238e-18	2.15265e-16	up	SERTAD3
TNFSF13B	1.8027	7.98081	80.89	1.00316e-17	2.19155e-16	up	TNFSF13B
RSPH9	1.3008	2.32821	80.8159	1.03488e-17	2.25358e-16	up	RSPH9
SIGLEC16	1.38333	2.56797	80.7834	1.04914e-17	2.28218e-16	up	SIGLEC16
DNAH6	-1.73806	-0.867885	80.6791	1.09615e-17	2.3761e-16	down	DNAH6
FLVCR2-AS1	1.9552	0.155465	80.6757	1.09771e-17	2.3761e-16	up	FLVCR2-AS1
TRAPPC5	1.71223	4.90766	80.6747	1.09815e-17	2.3761e-16	up	TRAPPC5
SMIM10L2A	-1.82217	-1.44063	80.6237	1.12196e-17	2.42503e-16	down	SMIM10L2A
OPLAH	3.11582	3.70095	80.6116	1.12769e-17	2.43484e-16	up	OPLAH
NQO2	1.66364	5.75675	80.6035	1.13151e-17	2.4379e-16	up	NQO2
XRCC4	1.53785	2.77455	80.468	1.19784e-17	2.57536e-16	up	XRCC4
ZFP14	-1.03579	2.70743	80.4539	1.20497e-17	2.58795e-16	down	ZFP14
ACADSB	-1.17347	2.77125	80.4332	1.21553e-17	2.60787e-16	down	ACADSB
NR1I3	1.4175	0.617353	80.3859	1.23995e-17	2.65466e-16	up	NR1I3
GRPEL2	-1.00368	2.96815	80.2955	1.28796e-17	2.74878e-16	down	GRPEL2
LOC112268235	1.19365	4.45977	80.2424	1.3171e-17	2.80509e-16	up	LOC112268235
GPR42	3.54063	1.01003	80.1445	1.37247e-17	2.91994e-16	up	GPR42
BMS1P2	-1.11305	0.129642	80.1118	1.39151e-17	2.9512e-16	down	BMS1P2
BST2	2.08095	6.63616	80.0511	1.42752e-17	3.01811e-16	up	BST2
LRG1	2.43645	8.04865	79.9951	1.46154e-17	3.08683e-16	up	LRG1
TRAV26-2	-1.95008	-0.887021	79.9351	1.49895e-17	3.16258e-16	down	TRAV26-2
IPO5P1	-1.05272	2.21671	79.886	1.53026e-17	3.22194e-16	down	IPO5P1
LOC107984898	-1.56347	0.475622	79.8121	1.57859e-17	3.31684e-16	down	LOC107984898
DNAJA1	1.67372	7.40465	79.6362	1.69999e-17	3.56822e-16	up	DNAJA1
CCNDBP1	1.2662	7.4738	79.5931	1.73113e-17	3.62237e-16	up	CCNDBP1
ZNF483	-1.47992	1.24886	79.4772	1.81781e-17	3.79594e-16	down	ZNF483
MIR3936HG	1.6825	2.06533	79.4728	1.82117e-17	3.79905e-16	up	MIR3936HG
FMNL3	-1.01548	4.1777	79.4685	1.82444e-17	3.80198e-16	down	FMNL3
LINC01093	4.84372	2.66963	79.4612	1.83013e-17	3.80916e-16	up	LINC01093
H2AC8	1.89734	0.517055	79.4562	1.83396e-17	3.80916e-16	up	H2AC8
TBC1D2	1.14063	4.83769	79.4548	1.83505e-17	3.80916e-16	up	TBC1D2
ANO10	1.23056	4.52918	79.4544	1.83538e-17	3.80916e-16	up	ANO10
NSG1	-1.46702	1.86584	79.3782	1.89523e-17	3.92537e-16	down	NSG1
ZNHIT1	1.17261	4.49274	79.3728	1.89958e-17	3.93038e-16	up	ZNHIT1
CD58	1.1744	5.38514	79.2082	2.03604e-17	4.19989e-16	up	CD58
LOC100507346	-1.61755	-1.31498	79.166	2.07262e-17	4.27102e-16	down	LOC100507346
POC1A	1.88577	1.53466	79.1556	2.08177e-17	4.28553e-16	up	POC1A
MRPL51	1.22337	4.11031	79.1135	2.11904e-17	4.35345e-16	up	MRPL51
FES	1.75555	6.43099	79.0368	2.18868e-17	4.48746e-16	up	FES
KCND1	1.81106	2.50371	78.9134	2.30569e-17	4.71786e-16	up	KCND1
GRN	1.61136	8.60863	78.7663	2.45333e-17	4.99483e-16	up	GRN
ENO2	-1.01478	3.13055	78.708	2.51444e-17	5.11413e-16	down	ENO2
NECTIN2	3.04041	4.18341	78.702	2.52083e-17	5.122e-16	up	NECTIN2
LOC102723663	2.03503	-0.26731	78.6761	2.54854e-17	5.17313e-16	up	LOC102723663
RPL26L1	1.22392	2.04069	78.6492	2.57768e-17	5.22706e-16	up	RPL26L1
PSMB6	1.28327	4.45412	78.6456	2.58164e-17	5.22987e-16	up	PSMB6
ZNF365	-1.69463	-0.544297	78.6195	2.61024e-17	5.27731e-16	down	ZNF365
CAMK2N1	-1.46724	-0.0660029	78.608	2.62292e-17	5.29669e-16	down	CAMK2N1
FOSL1	2.52362	-0.380728	78.6061	2.62504e-17	5.29669e-16	up	FOSL1
TSPO	2.5844	7.07317	78.5327	2.7077e-17	5.45019e-16	up	TSPO
CDON	-1.67039	-1.32858	78.5073	2.73685e-17	5.50047e-16	down	CDON
RPL23AP53	-1.05589	1.19239	78.462	2.78975e-17	5.58957e-16	down	RPL23AP53
DOK3	1.65136	8.56485	78.4599	2.79219e-17	5.58957e-16	up	DOK3
PFN1P2	-1.26993	0.252177	78.4576	2.79492e-17	5.58957e-16	down	PFN1P2
APOBEC3A	1.46342	7.64503	78.3914	2.87421e-17	5.73686e-16	up	APOBEC3A
MMP9	3.46211	8.95159	78.3579	2.91524e-17	5.81304e-16	up	MMP9
LOC105377156	2.2953	2.05408	78.3424	2.93435e-17	5.84543e-16	up	LOC105377156
RHBDF2	1.4413	6.39875	78.3285	2.95167e-17	5.87067e-16	up	RHBDF2
PRKCD	1.13038	8.09515	78.3276	2.9528e-17	5.87067e-16	up	PRKCD
CEBPB	1.75814	8.01054	78.2965	2.99178e-17	5.93656e-16	up	CEBPB
SUPT3H	-1.09134	1.271	78.2913	2.99837e-17	5.94385e-16	down	SUPT3H
NR1D1	-1.10053	1.48571	78.2782	3.01505e-17	5.97109e-16	down	NR1D1
LOC105373282	-2.07689	-2.16903	78.1845	3.13676e-17	6.18204e-16	down	LOC105373282
LOC112268437	-1.0254	1.87344	78.1394	3.19714e-17	6.29494e-16	down	LOC112268437
SEMA6B	4.10168	2.77012	78.1142	3.23137e-17	6.35617e-16	up	SEMA6B
LOC105369608	-2.02524	-1.79655	78.052	3.3175e-17	6.50044e-16	down	LOC105369608
ZNF10	-1.256	1.15237	77.9657	3.44089e-17	6.72925e-16	down	ZNF10
MYO10	2.67353	2.13901	77.952	3.46079e-17	6.76167e-16	up	MYO10
SH3GLB1	1.36085	8.17434	77.9441	3.47243e-17	6.7779e-16	up	SH3GLB1
KCNH8	-1.93046	-0.496209	77.9082	3.52545e-17	6.87479e-16	down	KCNH8
ZNF550	-1.19372	2.12196	77.8744	3.57625e-17	6.95386e-16	down	ZNF550
NUCB1	1.58358	7.45117	77.8331	3.63932e-17	7.06973e-16	up	NUCB1
MMP8	5.73624	7.83131	77.8246	3.65234e-17	7.08151e-16	up	MMP8
UBAP1	1.17166	6.86725	77.8091	3.67651e-17	7.12157e-16	up	UBAP1
MTUS1	-1.63076	0.305395	77.7302	3.80115e-17	7.34204e-16	down	MTUS1
KREMEN1	2.3176	6.93684	77.5699	4.06809e-17	7.83531e-16	up	KREMEN1
TNFSF13	1.11904	5.1927	77.4593	4.26302e-17	8.1875e-16	up	TNFSF13
SCPEP1	1.07574	6.69775	77.4517	4.27682e-17	8.19852e-16	up	SCPEP1
TASP1	-1.03498	0.807956	77.4208	4.33309e-17	8.29075e-16	down	TASP1
PKIA	-1.30071	1.91295	77.333	4.49714e-17	8.58043e-16	down	PKIA
LOC102723475	2.4316	1.91577	77.3208	4.52049e-17	8.6169e-16	up	LOC102723475
GABARAPL2	1.33173	6.87791	77.2997	4.56111e-17	8.68618e-16	up	GABARAPL2
NPTXR	-1.28974	0.953939	77.2649	4.62873e-17	8.79849e-16	down	NPTXR
TUBA1C	1.02303	6.04835	77.2576	4.64307e-17	8.8175e-16	up	TUBA1C
ST14	1.39082	4.17344	77.2471	4.66386e-17	8.84872e-16	up	ST14
SCN1B	2.05477	2.7539	77.2303	4.69705e-17	8.90337e-16	up	SCN1B
ALOX5AP	2.02762	8.89849	77.2219	4.71378e-17	8.91847e-16	up	ALOX5AP
LOC102724323	1.78347	2.35398	77.1897	4.77863e-17	9.02437e-16	up	LOC102724323
LTBR	1.47604	5.95623	77.1479	4.86402e-17	9.17712e-16	up	LTBR
IFI27	6.67522	7.14448	77.1147	4.93285e-17	9.29835e-16	up	IFI27
GRAMD1A	2.09774	7.43135	77.0925	4.97948e-17	9.36888e-16	up	GRAMD1A
SERPINB10	3.26349	2.468	77.0819	5.00202e-17	9.40259e-16	up	SERPINB10
ARG1	3.68264	5.96986	77.0102	5.15613e-17	9.68333e-16	up	ARG1
C3orf86P	2.76083	5.70395	77.0055	5.16658e-17	9.694e-16	up	C3orf86P
CABP7	1.26442	1.85547	76.9575	5.27274e-17	9.88408e-16	up	CABP7
ADGRG3	1.99318	8.38914	76.8817	5.44483e-17	1.01879e-15	up	ADGRG3
LOC105369816	-1.44563	-0.0989784	76.8713	5.46888e-17	1.02235e-15	down	LOC105369816
LOC105370774	-1.24753	-0.246989	76.8683	5.47576e-17	1.0227e-15	down	LOC105370774
GVQW3	-1.15511	1.35344	76.8309	5.56336e-17	1.0381e-15	down	GVQW3
SERPINA1	1.61067	10.9755	76.8261	5.57477e-17	1.03928e-15	up	SERPINA1
MPDU1	1.20576	4.36921	76.7826	5.67859e-17	1.0567e-15	up	MPDU1
GPA33	-1.3424	1.19291	76.7764	5.69339e-17	1.05752e-15	down	GPA33
PRR13	1.10368	8.01162	76.7379	5.78713e-17	1.07297e-15	up	PRR13
NDUFA4	1.47656	4.56988	76.6268	6.06632e-17	1.12064e-15	up	NDUFA4
CAPZA1	1.00005	8.70412	76.6126	6.10294e-17	1.12576e-15	up	CAPZA1
MROH6	2.30529	3.231	76.5693	6.21618e-17	1.14314e-15	up	MROH6
COX10-DT	-1.09315	0.574191	76.537	6.30191e-17	1.15786e-15	down	COX10-DT
SLC51A	2.88946	2.8819	76.5346	6.30826e-17	1.15797e-15	up	SLC51A
TIMM8B	1.3026	2.54383	76.4351	6.58031e-17	1.20683e-15	up	TIMM8B
CARD17P	3.15127	4.55296	76.4047	6.66589e-17	1.22032e-15	up	CARD17P
CCDC180	-1.04914	0.456888	76.2955	6.98194e-17	1.27359e-15	down	CCDC180
LINC01801	-1.72069	-1.25269	76.2906	6.99662e-17	1.27513e-15	down	LINC01801
KANK1	-1.27952	1.29765	76.2782	7.03348e-17	1.27955e-15	down	KANK1
CD14	1.63713	7.98596	76.2603	7.08722e-17	1.28818e-15	up	CD14
SEZ6L	-1.73599	-0.623922	76.162	7.38922e-17	1.33591e-15	down	SEZ6L
PRDX5	1.34667	6.51527	76.1101	7.55392e-17	1.36447e-15	up	PRDX5
OPRL1	1.53362	4.0847	76.1023	7.57874e-17	1.36774e-15	up	OPRL1
TGFB3	-1.12971	0.173403	76.0696	7.68491e-17	1.38475e-15	down	TGFB3
INSL3	2.2339	1.85563	76.067	7.69341e-17	1.38475e-15	up	INSL3
DNASE1L1	1.03285	4.58255	75.9746	8.00146e-17	1.43765e-15	up	DNASE1L1
HFE-AS1	2.08471	2.1797	75.9622	8.04372e-17	1.44396e-15	up	HFE-AS1
ROPN1L	1.9432	4.18845	75.9557	8.06563e-17	1.44662e-15	up	ROPN1L
NEPRO-AS1	-1.1316	-0.382501	75.8834	8.31749e-17	1.48786e-15	down	NEPRO-AS1
PGLYRP1	2.92266	5.86014	75.8464	8.44919e-17	1.50876e-15	up	PGLYRP1
ZNF737	-1.00946	3.17693	75.8374	8.48153e-17	1.51188e-15	down	ZNF737
CYBA	1.54122	8.88314	75.8062	8.59485e-17	1.5294e-15	up	CYBA
SMIM3	1.10999	3.84025	75.7962	8.63138e-17	1.53456e-15	up	SMIM3
ARPC1B	1.46914	8.42055	75.7455	8.81923e-17	1.56386e-15	up	ARPC1B
LOC102725228	1.12311	1.31579	75.7417	8.83369e-17	1.56506e-15	up	LOC102725228
CYP1B1-AS1	2.60697	1.80443	75.6969	9.00362e-17	1.59239e-15	up	CYP1B1-AS1
TYMP	1.87167	8.10274	75.6749	9.0879e-17	1.60311e-15	up	TYMP
LOC105375981	-1.14047	1.28257	75.6268	9.27575e-17	1.63341e-15	down	LOC105375981
NARF	1.25624	6.41971	75.6048	9.36296e-17	1.64592e-15	up	NARF
RPGRIP1L	-1.33679	-0.175173	75.5987	9.38708e-17	1.64874e-15	down	RPGRIP1L
CHIC1	-1.38006	2.34132	75.5883	9.42894e-17	1.65466e-15	down	CHIC1
CFAP58-DT	1.88827	2.59215	75.5602	9.54227e-17	1.6731e-15	up	CFAP58-DT
SLC12A5-AS1	3.48119	6.33189	75.5229	9.69488e-17	1.6984e-15	up	SLC12A5-AS1
ZNF793	-1.26559	1.08399	75.4952	9.80942e-17	1.71699e-15	down	ZNF793
LOC107987145	1.8215	-0.281846	75.4782	9.88067e-17	1.72797e-15	up	LOC107987145
CFAP97	-1.19078	3.50051	75.4549	9.97913e-17	1.74369e-15	down	CFAP97
CENPW	2.07072	0.299214	75.4527	9.98859e-17	1.74384e-15	up	CENPW
DST	-1.19299	1.17589	75.4427	1.00312e-16	1.74978e-15	down	DST
HOOK1	-1.67385	1.03932	75.4377	1.00527e-16	1.75202e-15	down	HOOK1
RPS6KA5	-1.08792	4.6767	75.3835	1.02869e-16	1.78977e-15	down	RPS6KA5
SEMA4A	1.406	7.23303	75.3718	1.03382e-16	1.79717e-15	up	SEMA4A
ATP6V0E2-AS1	-1.38195	-0.353145	75.3141	1.05952e-16	1.83831e-15	down	ATP6V0E2-AS1
ZXDA	-1.11038	1.02592	75.3126	1.0602e-16	1.83831e-15	down	ZXDA
HABP4	-1.02249	2.46232	75.2489	1.08932e-16	1.88558e-15	down	HABP4
UBE2C	2.00703	1.81108	75.2249	1.10051e-16	1.90334e-15	up	UBE2C
ZNF470	-1.12137	0.753479	75.217	1.10421e-16	1.9065e-15	down	ZNF470
SRPK1	1.39574	7.47132	75.1834	1.12011e-16	1.93231e-15	up	SRPK1
KLHDC1	-1.44307	0.69019	75.1082	1.15652e-16	1.99006e-15	down	KLHDC1
GPR141	1.6858	5.81293	75.0906	1.16525e-16	2.00338e-15	up	GPR141
IMMP2L	-1.37106	0.84575	75.0721	1.17444e-16	2.01747e-15	down	IMMP2L
STX10	1.20169	5.83103	75.0699	1.17555e-16	2.01767e-15	up	STX10
QSOX1	1.54867	6.21814	75.0192	1.20121e-16	2.05652e-15	up	QSOX1
FPR1	1.68457	10.5277	74.9903	1.21604e-16	2.08016e-15	up	FPR1
SLC16A3	1.94624	7.30881	74.9671	1.22813e-16	2.09731e-15	up	SLC16A3
FABP5	1.8822	1.94882	74.9055	1.26079e-16	2.14767e-15	up	FABP5
SDR42E1	-1.30213	1.06536	74.8994	1.26405e-16	2.15142e-15	down	SDR42E1
IFI35	2.31128	5.9332	74.89	1.26914e-16	2.15828e-15	up	IFI35
PNPLA1	1.72545	3.72745	74.7793	1.33042e-16	2.25495e-15	up	PNPLA1
ST3GAL2	1.25209	6.75724	74.764	1.33906e-16	2.26771e-15	up	ST3GAL2
SLC66A2	1.7211	4.92187	74.7576	1.34277e-16	2.27053e-15	up	SLC66A2
CLEC4E	1.94929	7.68995	74.6667	1.39577e-16	2.3559e-15	up	CLEC4E
ZNF600	-1.1104	3.25678	74.6375	1.41322e-16	2.38338e-15	down	ZNF600
NBEA	-1.4494	-0.0822233	74.5581	1.46187e-16	2.46338e-15	down	NBEA
SUGT1P4-STRA6LP-CCDC180	-1.03674	0.486551	74.5557	1.46336e-16	2.46385e-15	down	SUGT1P4-STRA6LP-CCDC180
CCDC136	-1.12783	0.638946	74.5461	1.46935e-16	2.47189e-15	down	CCDC136
PIM3	1.76698	5.91153	74.4973	1.50025e-16	2.52178e-15	up	PIM3
SNX29P1	-1.30205	0.00748095	74.4617	1.52322e-16	2.55827e-15	down	SNX29P1
TNFAIP6	3.08524	6.6326	74.3204	1.61779e-16	2.70817e-15	up	TNFAIP6
MSX2P1	-1.26822	-0.00268083	74.3124	1.62331e-16	2.71517e-15	down	MSX2P1
C11orf65	-1.03579	1.08421	74.3059	1.62777e-16	2.7204e-15	down	C11orf65
LOC107984785	-1.49119	-1.01624	74.2357	1.67727e-16	2.79851e-15	down	LOC107984785
ALOX5	1.60317	8.87921	74.2308	1.68076e-16	2.80204e-15	up	ALOX5
MLKL	1.28766	6.69177	74.2139	1.69291e-16	2.81978e-15	up	MLKL
MARCHF3	1.74338	3.19659	74.2122	1.69417e-16	2.81978e-15	up	MARCHF3
CAMP	2.89805	4.92888	74.1952	1.70649e-16	2.83796e-15	up	CAMP
STAC3	1.35562	3.69535	74.1459	1.74276e-16	2.8912e-15	up	STAC3
SLC2A14	1.8821	4.9288	74.135	1.75092e-16	2.90236e-15	up	SLC2A14
CSRNP1	1.63454	5.69117	74.1146	1.7662e-16	2.9243e-15	up	CSRNP1
DYNC2H1	-1.22133	0.308522	74.1135	1.76703e-16	2.9243e-15	down	DYNC2H1
GABARAP	1.38758	8.98427	74.0786	1.79353e-16	2.96574e-15	up	GABARAP
CD300C	1.27521	4.24052	74.0416	1.82204e-16	3.01043e-15	up	CD300C
BDH1	-1.0164	2.29548	74.0378	1.82503e-16	3.01293e-15	down	BDH1
ACSL1	2.01455	11.1031	73.9925	1.86062e-16	3.06582e-15	up	ACSL1
AP3B2	4.50144	2.60552	73.9226	1.91702e-16	3.15455e-15	up	AP3B2
FSBP	-1.72227	-1.16344	73.8355	1.98959e-16	3.26604e-15	down	FSBP
ZNF382	-1.18357	0.919047	73.8016	2.01856e-16	3.31093e-15	down	ZNF382
FCN1	1.20619	9.95913	73.7865	2.03165e-16	3.32972e-15	up	FCN1
JMJD6	1.07622	4.93951	73.7658	2.04965e-16	3.3565e-15	up	JMJD6
TIAM1	-1.00747	3.97377	73.7491	2.06439e-16	3.37793e-15	down	TIAM1
MDS2	-1.52942	0.212823	73.728	2.08302e-16	3.40293e-15	down	MDS2
SH3PXD2B	3.09583	2.38505	73.5448	2.25259e-16	3.67405e-15	up	SH3PXD2B
ZMAT5	1.24621	2.7438	73.5411	2.25611e-16	3.67685e-15	up	ZMAT5
AHNAK2	-1.61069	-1.39889	73.4631	2.33256e-16	3.79605e-15	down	AHNAK2
TSHZ2	-1.29691	2.09513	73.4627	2.33298e-16	3.79605e-15	down	TSHZ2
GAS7	1.65286	7.84947	73.4404	2.35531e-16	3.82931e-15	up	GAS7
FUT7	2.34331	5.48264	73.4199	2.37602e-16	3.8599e-15	up	FUT7
ATP6V0D1	1.37723	7.65349	73.4099	2.38615e-16	3.87326e-15	up	ATP6V0D1
SMIM10	2.09461	-0.916869	73.4033	2.39292e-16	3.881e-15	up	SMIM10
WDR27	-1.00049	1.66077	73.3997	2.39665e-16	3.881e-15	down	WDR27
OBSCN	-1.22186	2.8995	73.3751	2.42189e-16	3.91565e-15	down	OBSCN
STXBP2	1.60645	8.04331	73.3639	2.43358e-16	3.93142e-15	up	STXBP2
ELK4	-1.05269	5.19651	73.3495	2.44856e-16	3.94934e-15	down	ELK4
NEO1	-1.04388	1.50603	73.3232	2.47624e-16	3.99082e-15	down	NEO1
BASP1-AS1	2.56788	1.25653	73.287	2.51488e-16	4.04669e-15	up	BASP1-AS1
LILRB3	1.53968	8.81181	73.2214	2.58641e-16	4.1585e-15	up	LILRB3
PAK3	-1.67493	-1.09456	73.2029	2.60691e-16	4.18815e-15	down	PAK3
AGAP7P	-1.20926	2.40375	73.1739	2.63944e-16	4.23706e-15	down	AGAP7P
ABCD2	-1.46421	2.65561	73.1499	2.66671e-16	4.27746e-15	down	ABCD2
ELOVL4	-1.68724	-0.526006	73.1364	2.68216e-16	4.29885e-15	down	ELOVL4
ACVR1C	-1.78296	0.0261288	73.1195	2.70156e-16	4.32653e-15	down	ACVR1C
MINDY4B	2.72568	0.220358	73.0896	2.73636e-16	4.37882e-15	up	MINDY4B
DOCK8-AS1	1.15515	1.88079	72.9426	2.91384e-16	4.64527e-15	up	DOCK8-AS1
IFNGR1	1.33281	8.26421	72.9423	2.91428e-16	4.64527e-15	up	IFNGR1
RHOG	1.72502	8.39713	72.9117	2.95262e-16	4.70269e-15	up	RHOG
ZMAT2	1.33819	6.51772	72.9007	2.96652e-16	4.72114e-15	up	ZMAT2
KIAA0408	-1.30603	-0.619587	72.8859	2.98543e-16	4.74379e-15	down	KIAA0408
ARRB2	1.36489	9.58238	72.8692	3.00684e-16	4.77409e-15	up	ARRB2
SLC26A6	1.18441	3.59904	72.8621	3.01593e-16	4.78479e-15	up	SLC26A6
TMEM150B	1.86928	3.09399	72.8019	3.09462e-16	4.90199e-15	up	TMEM150B
RFX7	-1.09223	3.60462	72.7615	3.14868e-16	4.98374e-15	down	RFX7
RARA-AS1	1.655	3.30296	72.7312	3.18973e-16	5.04479e-15	up	RARA-AS1
LOC105373510	1.71001	1.06152	72.6433	3.31209e-16	5.23017e-15	up	LOC105373510
PLEKHB1	-1.23953	2.41433	72.6348	3.32405e-16	5.24498e-15	down	PLEKHB1
EMILIN2	1.43817	6.86212	72.5843	3.3967e-16	5.35546e-15	up	EMILIN2
MVP	1.1575	7.97875	72.5267	3.48161e-16	5.48509e-15	up	MVP
POR	1.78093	6.26825	72.5153	3.49859e-16	5.50758e-15	up	POR
LINC02990	5.52145	0.206142	72.4407	3.61214e-16	5.67315e-15	up	LINC02990
MBLAC2	-1.43624	1.26769	72.4111	3.65828e-16	5.73898e-15	down	MBLAC2
PLA2G4A	1.20261	2.89625	72.4102	3.6597e-16	5.73898e-15	up	PLA2G4A
MKNK1	1.53833	7.29596	72.4039	3.66954e-16	5.74998e-15	up	MKNK1
LINC02210	-1.08554	1.96509	72.3937	3.68557e-16	5.77066e-15	down	LINC02210
ANKEF1	-1.24992	0.901687	72.3694	3.72412e-16	5.82653e-15	down	ANKEF1
IFITM2	2.12713	11.2627	72.2931	3.84793e-16	6.01561e-15	up	IFITM2
FFAR2	1.8431	8.69464	72.2652	3.89417e-16	6.08323e-15	up	FFAR2
LTA4H	1.13987	8.25275	72.2201	3.9702e-16	6.19723e-15	up	LTA4H
JUNB	1.61802	7.85507	72.211	3.98564e-16	6.21655e-15	up	JUNB
LOC107984706	-2.09159	-1.80386	72.1437	4.10233e-16	6.38877e-15	down	LOC107984706
LOC105376725	1.96235	1.96989	72.1312	4.12439e-16	6.41821e-15	up	LOC105376725
MYBPC3	1.76139	3.4121	72.0863	4.20446e-16	6.53281e-15	up	MYBPC3
HCK	1.54559	9.3717	72.0537	4.26353e-16	6.61954e-15	up	HCK
USP53	-1.31966	2.70501	72.0086	4.34684e-16	6.74123e-15	down	USP53
ARHGAP32	-1.0438	1.3695	72.0077	4.34854e-16	6.74123e-15	down	ARHGAP32
IRF7	2.69284	6.58316	71.9887	4.38408e-16	6.78082e-15	up	IRF7
CD55	1.75357	8.8305	71.9697	4.41984e-16	6.82575e-15	up	CD55
TMEM67	-1.38627	-0.283096	71.959	4.44032e-16	6.84216e-15	down	TMEM67
LOC101927272	1.28995	1.60382	71.913	4.52873e-16	6.96746e-15	up	LOC101927272
LOC107985323	2.75134	-0.596413	71.9081	4.53831e-16	6.97693e-15	up	LOC107985323
EXOSC4	2.78923	2.96367	71.8851	4.58325e-16	7.04068e-15	up	EXOSC4
SLCO4A1	2.77787	1.00395	71.8525	4.64776e-16	7.1344e-15	up	SLCO4A1
ST8SIA1	-1.36363	0.496286	71.7887	4.77664e-16	7.32119e-15	down	ST8SIA1
ZNF391	-1.44206	-0.00234364	71.7056	4.94993e-16	7.55831e-15	down	ZNF391
PRMT5-AS1	1.05627	2.58527	71.6927	4.97743e-16	7.59459e-15	up	PRMT5-AS1
LOC107987219	-1.46567	-1.04807	71.5964	5.18753e-16	7.90923e-15	down	LOC107987219
SHISA2	-2.0935	-2.20474	71.5836	5.21606e-16	7.94678e-15	down	SHISA2
PET100	1.10229	3.22225	71.5213	5.35741e-16	8.14992e-15	up	PET100
SOCS3-DT	2.917	0.421232	71.4464	5.53239e-16	8.40352e-15	up	SOCS3-DT
SDHAF3	1.46377	2.88044	71.2725	5.96123e-16	9.02796e-15	up	SDHAF3
H1-2	1.65102	4.97383	71.1944	6.16455e-16	9.31507e-15	up	H1-2
SAP30	1.45492	3.05968	71.1923	6.17012e-16	9.31657e-15	up	SAP30
FERMT3	1.26863	7.53901	71.1729	6.22165e-16	9.3874e-15	up	FERMT3
CEBPA	1.43211	5.37832	71.1627	6.24894e-16	9.42159e-15	up	CEBPA
PSENEN	1.37458	5.19032	71.0589	6.53389e-16	9.82697e-15	up	PSENEN
SLC4A7	-1.38651	3.74185	71.0578	6.53714e-16	9.82697e-15	down	SLC4A7
ATP8A2	-1.46132	-0.506863	71.0082	6.67805e-16	1.00314e-14	down	ATP8A2
SH2B2	1.57743	4.75645	70.9797	6.76022e-16	1.01473e-14	up	SH2B2
CYP2U1	-1.09567	1.74619	70.8899	7.02611e-16	1.05231e-14	down	CYP2U1
ZC3H12B	-1.16017	0.70043	70.8819	7.05039e-16	1.05517e-14	down	ZC3H12B
CCND3	1.30624	7.59546	70.8453	7.16216e-16	1.06875e-14	up	CCND3
CEBPD	2.03363	7.4678	70.8084	7.27673e-16	1.08426e-14	up	CEBPD
GRB10	2.54185	4.83255	70.7983	7.30828e-16	1.08816e-14	up	GRB10
MAP3K20	1.32262	4.81083	70.6812	7.6859e-16	1.14105e-14	up	MAP3K20
PTGR1	2.3411	0.0239327	70.6353	7.83899e-16	1.16208e-14	up	PTGR1
SERPINB2	1.94431	2.34002	70.6271	7.86659e-16	1.16532e-14	up	SERPINB2
ACER3	1.40244	5.98362	70.6136	7.91249e-16	1.17127e-14	up	ACER3
LOC105373311	1.51978	0.506825	70.5724	8.05376e-16	1.19131e-14	up	LOC105373311
BORCS8	1.19665	3.44172	70.5449	8.14991e-16	1.20466e-14	up	BORCS8
LOC101927759	1.8503	2.4331	70.4889	8.3486e-16	1.23134e-14	up	LOC101927759
MTHFS	1.47127	4.04019	70.4736	8.40359e-16	1.23855e-14	up	MTHFS
LINC01503	1.93387	2.03411	70.4619	8.44591e-16	1.24389e-14	up	LINC01503
TOM1	1.29832	5.90813	70.4315	8.55725e-16	1.25839e-14	up	TOM1
ZNF154	-1.35037	1.9691	70.4308	8.55991e-16	1.25839e-14	down	ZNF154
IL15RA	1.21005	2.96707	70.4133	8.62457e-16	1.26653e-14	up	IL15RA
ANKRD9	2.06305	3.91945	70.3866	8.72402e-16	1.27929e-14	up	ANKRD9
NRN1	2.90615	1.2387	70.3832	8.73707e-16	1.28028e-14	up	NRN1
LAMTOR2	1.24103	3.94843	70.3677	8.79541e-16	1.28605e-14	up	LAMTOR2
TDRD9	2.85202	4.5359	70.3453	8.88053e-16	1.29756e-14	up	TDRD9
PYGL	1.67789	9.25772	70.3056	9.03361e-16	1.31894e-14	up	PYGL
LOC102724608	1.94858	1.84691	70.2731	9.16081e-16	1.33564e-14	up	LOC102724608
SERINC2	2.53322	2.06877	70.2428	9.28123e-16	1.35126e-14	up	SERINC2
ZNF286B	-1.04676	0.634652	70.2284	9.3389e-16	1.35868e-14	down	ZNF286B
PYCARD	1.73236	5.41511	70.1386	9.70705e-16	1.40922e-14	up	PYCARD
ZDHHC12	1.57355	4.15146	70.125	9.76412e-16	1.41649e-14	up	ZDHHC12
LINC02970	2.32855	0.450479	70.0261	1.01887e-15	1.47494e-14	up	LINC02970
C2	2.65152	3.19999	70.0076	1.02703e-15	1.48568e-14	up	C2
LIMK2	1.65819	8.51959	69.9946	1.03279e-15	1.49295e-14	up	LIMK2
HRH2	1.82803	8.29018	69.9762	1.04099e-15	1.50267e-14	up	HRH2
ZNF890P	-1.03408	-0.280887	69.9585	1.04899e-15	1.51316e-14	down	ZNF890P
ELOVL3	1.95918	-0.395108	69.9528	1.05156e-15	1.51578e-14	up	ELOVL3
PLAUR	1.31599	6.43222	69.9464	1.05445e-15	1.5186e-14	up	PLAUR
SLA	1.29481	8.90716	69.9452	1.05501e-15	1.5186e-14	up	SLA
ZNF204P	-1.61331	0.641515	69.8656	1.0918e-15	1.57045e-14	down	ZNF204P
VAPA	1.01324	7.31526	69.8523	1.09808e-15	1.57836e-14	up	VAPA
LOC105375539	-1.65161	-1.00333	69.8042	1.12107e-15	1.60799e-14	down	LOC105375539
KRT73-AS1	-1.64316	-0.741658	69.7464	1.14933e-15	1.64621e-14	down	KRT73-AS1
ZNF787	1.46182	4.98617	69.7253	1.15987e-15	1.66014e-14	up	ZNF787
MYBL1	-1.53394	3.75461	69.6124	1.21771e-15	1.73682e-14	down	MYBL1
EMC6	1.05723	1.91009	69.5982	1.22515e-15	1.74621e-14	up	EMC6
LOC105377449	1.36793	2.56095	69.5534	1.24907e-15	1.77807e-14	up	LOC105377449
H2BC6	2.30878	-0.257063	69.553	1.24926e-15	1.77807e-14	up	H2BC6
SIGLEC9	1.33064	6.58678	69.5231	1.26546e-15	1.79615e-14	up	SIGLEC9
B4GALT5	1.46048	7.78004	69.4802	1.28913e-15	1.82804e-14	up	B4GALT5
LOC107986482	2.12512	-0.261129	69.479	1.28976e-15	1.82804e-14	up	LOC107986482
LOC105370355	2.45374	1.02515	69.4515	1.30517e-15	1.84859e-14	up	LOC105370355
H3-5	1.31097	4.47548	69.4005	1.33417e-15	1.88573e-14	up	H3-5
SYDE2	-1.60829	-0.926218	69.3906	1.3399e-15	1.89251e-14	down	SYDE2
HPN	3.26778	-0.132136	69.3802	1.3459e-15	1.89967e-14	up	HPN
ZNF30	-1.13263	0.841518	69.3161	1.38363e-15	1.95157e-14	down	ZNF30
KCNA3	-1.16015	5.27207	69.3142	1.38479e-15	1.95186e-14	down	KCNA3
MIR10393	1.19592	9.04438	69.2876	1.40081e-15	1.97169e-14	up	MIR10393
MIR600HG	-1.3688	1.06279	69.2803	1.40516e-15	1.97646e-14	down	MIR600HG
LOC101929319	2.73112	2.33607	69.2713	1.41066e-15	1.98282e-14	up	LOC101929319
LINC00926	-1.46724	3.83157	69.2423	1.42842e-15	2.00639e-14	down	LINC00926
MIR4697HG	-1.17295	1.60303	69.2248	1.43927e-15	2.01885e-14	down	MIR4697HG
SECTM1	2.08352	8.02358	69.1951	1.45783e-15	2.04226e-14	up	SECTM1
ZBTB7B	1.3196	7.27722	69.1436	1.49059e-15	2.08365e-14	up	ZBTB7B
PADI4	1.69463	7.70144	69.1019	1.51766e-15	2.11858e-14	up	PADI4
CDKN1A	1.47885	4.53326	69.0908	1.5249e-15	2.12723e-14	up	CDKN1A
SPI1	1.75508	9.66065	69.0681	1.53995e-15	2.14519e-14	up	SPI1
STXBP4	-1.17705	1.05428	69.0666	1.54094e-15	2.14519e-14	down	STXBP4
SLC9A8	1.15609	6.35929	69.0586	1.54625e-15	2.14963e-14	up	SLC9A8
GNS	1.06831	8.21023	69.0004	1.58559e-15	2.20132e-14	up	GNS
DHRSX	1.01834	3.61498	68.993	1.5907e-15	2.2069e-14	up	DHRSX
CLU	1.76046	7.00035	68.9626	1.61173e-15	2.23303e-14	up	CLU
LOC105371912	2.34924	1.32637	68.9112	1.64788e-15	2.28157e-14	up	LOC105371912
ZNF135	-1.49315	-0.563541	68.8985	1.65691e-15	2.29251e-14	down	ZNF135
H3-3B	1.04625	9.77235	68.8725	1.67567e-15	2.31689e-14	up	H3-3B
RAI14	-2.01462	-1.98154	68.8585	1.68577e-15	2.32928e-14	down	RAI14
MTX3	-1.19929	2.98736	68.8499	1.69209e-15	2.33484e-14	down	MTX3
ZZZ3	-1.03125	3.44572	68.7177	1.79152e-15	2.46702e-14	down	ZZZ3
LOC101926907	-1.12187	0.263498	68.6102	1.8767e-15	2.57733e-14	down	LOC101926907
RNA18SN5	1.92555	9.33524	68.5832	1.89866e-15	2.60397e-14	up	RNA18SN5
FTL	1.42629	11.4701	68.5507	1.92553e-15	2.63904e-14	up	FTL
TRPC1	-1.40095	0.136301	68.5186	1.95242e-15	2.67229e-14	down	TRPC1
PLBD1-AS1	1.72535	0.390194	68.5115	1.95844e-15	2.67692e-14	up	PLBD1-AS1
LACTB	1.16088	5.45013	68.4923	1.97478e-15	2.69745e-14	up	LACTB
BMS1P1	-1.151	0.404871	68.4867	1.97953e-15	2.70212e-14	down	BMS1P1
C1RL	1.14001	6.61626	68.4138	2.0429e-15	2.78303e-14	up	C1RL
VAV1	1.06977	7.42393	68.4017	2.05364e-15	2.79443e-14	up	VAV1
APBA1	-1.64858	-1.33081	68.3427	2.10669e-15	2.86226e-14	down	APBA1
MGAM2	2.24958	5.27949	68.3244	2.12347e-15	2.87736e-14	up	MGAM2
PDE1B	1.20474	3.50347	68.2958	2.14982e-15	2.90919e-14	up	PDE1B
TP53I11	1.77257	6.62515	68.294	2.15151e-15	2.90954e-14	up	TP53I11
UBC	1.03016	10.676	68.275	2.16924e-15	2.92769e-14	up	UBC
LOC102723507	-1.10778	0.556431	68.1634	2.27657e-15	3.0705e-14	down	LOC102723507
AURKAIP1	1.1581	5.03435	68.1337	2.30596e-15	3.10601e-14	up	AURKAIP1
RNA18SN1	1.89211	9.39392	68.1146	2.32517e-15	3.12982e-14	up	RNA18SN1
RNF175	1.46152	3.76489	68.1083	2.33147e-15	3.13623e-14	up	RNF175
AKAP11	-1.13573	4.37852	68.0932	2.34679e-15	3.15475e-14	down	AKAP11
ELOB	1.34232	5.32919	68.0837	2.35638e-15	3.16555e-14	up	ELOB
RNA18SN4	1.91886	9.34922	68.0775	2.3627e-15	3.17195e-14	up	RNA18SN4
GNA15-DT	1.40626	0.959809	68.0285	2.41336e-15	3.23569e-14	up	GNA15-DT
VPS13A	-1.0748	4.0784	68.0269	2.41507e-15	3.23585e-14	down	VPS13A
LOC105378041	3.33651	-0.584014	67.9904	2.45345e-15	3.2851e-14	up	LOC105378041
SHISA5	1.44507	8.48185	67.9242	2.52475e-15	3.37835e-14	up	SHISA5
LOC101928126	-1.2113	1.7122	67.9117	2.53848e-15	3.39448e-14	down	LOC101928126
ADGRA3	-1.57214	-0.753546	67.8903	2.56209e-15	3.42381e-14	down	ADGRA3
LOC101928816	1.54761	1.09092	67.8615	2.59424e-15	3.45995e-14	up	LOC101928816
TIMM17B	1.29868	4.02884	67.8261	2.63434e-15	3.50883e-14	up	TIMM17B
KCNG2	1.6532	3.62426	67.801	2.6631e-15	3.54249e-14	up	KCNG2
PLOD1	1.13412	5.44967	67.7971	2.66758e-15	3.54614e-14	up	PLOD1
IL1RN	2.57795	8.18784	67.7868	2.67955e-15	3.55972e-14	up	IL1RN
TUBB4B	1.06152	5.79437	67.7292	2.74724e-15	3.64727e-14	up	TUBB4B
LHFPL2	1.74911	5.14203	67.6661	2.82325e-15	3.74085e-14	up	LHFPL2
GRAPL	-1.11929	2.46183	67.6486	2.84483e-15	3.76454e-14	down	GRAPL
LOC101929200	-1.36971	-0.990819	67.6245	2.87461e-15	3.80147e-14	down	LOC101929200
RNA18SN3	1.90162	9.37605	67.6198	2.88053e-15	3.80683e-14	up	RNA18SN3
LOC105372407	2.82053	0.963737	67.6177	2.88316e-15	3.80783e-14	up	LOC105372407
SOGA3	-1.22282	-0.306384	67.5974	2.90861e-15	3.83763e-14	down	SOGA3
MTARC1	1.52247	6.18833	67.5967	2.9095e-15	3.83763e-14	up	MTARC1
GGT1	1.58986	3.78671	67.582	2.92803e-15	3.85958e-14	up	GGT1
ST20-MTHFS	1.40807	4.23621	67.4957	3.03951e-15	3.99874e-14	up	ST20-MTHFS
GGH	2.14415	2.16989	67.4705	3.0729e-15	4.03745e-14	up	GGH
IFITM10	1.47728	0.896124	67.4332	3.12294e-15	4.10055e-14	up	IFITM10
IL18R1	2.68667	6.76272	67.2841	3.33149e-15	4.36133e-14	up	IL18R1
IGFLR1	1.46421	5.40022	67.2835	3.33227e-15	4.36133e-14	up	IGFLR1
MTF1	1.28328	6.42586	67.2412	3.39392e-15	4.43916e-14	up	MTF1
AP1S1	1.05322	2.97853	67.2269	3.41506e-15	4.46394e-14	up	AP1S1
RAB33B-AS1	1.27444	2.6601	67.2098	3.44048e-15	4.49139e-14	up	RAB33B-AS1
NUCB1-AS1	1.30494	4.15203	67.1866	3.47529e-15	4.53393e-14	up	NUCB1-AS1
AJAP1	-2.01605	-1.75635	67.1646	3.50857e-15	4.57442e-14	down	AJAP1
COX7B	1.34547	3.86889	67.1343	3.55494e-15	4.6319e-14	up	COX7B
PTPRK-AS1	-1.80647	-1.95339	67.1203	3.57663e-15	4.65717e-14	down	PTPRK-AS1
NTSR1	2.53516	1.96308	67.05	3.68735e-15	4.78908e-14	up	NTSR1
NRADDP	1.85206	0.409939	67.0345	3.71228e-15	4.81531e-14	up	NRADDP
ZFP28	-1.07611	0.995273	67.0284	3.72207e-15	4.82493e-14	down	ZFP28
MSL3	1.16108	7.15361	66.9909	3.78309e-15	4.90091e-14	up	MSL3
BBS5	-1.32968	-0.78375	66.9619	3.83105e-15	4.95357e-14	down	BBS5
GLDN	3.48856	-0.84165	66.9383	3.87043e-15	4.99993e-14	up	GLDN
OR2A9P	-1.07555	-0.0107113	66.9375	3.87182e-15	4.99993e-14	down	OR2A9P
LOC102724497	-1.42255	-0.982821	66.8998	3.93563e-15	5.07268e-14	down	LOC102724497
DENND3-AS1	1.30661	2.49488	66.856	4.01103e-15	5.16331e-14	up	DENND3-AS1
TCN1	2.42021	4.88393	66.8313	4.05437e-15	5.21251e-14	up	TCN1
LOC112268238	1.16302	4.37619	66.7762	4.15245e-15	5.33444e-14	up	LOC112268238
LOC101929667	2.44696	4.11794	66.7751	4.15446e-15	5.33444e-14	up	LOC101929667
GAL3ST4	-1.15236	1.0972	66.7582	4.18495e-15	5.3702e-14	down	GAL3ST4
DAB1	-1.82368	-1.62081	66.7212	4.25281e-15	5.45384e-14	down	DAB1
PARP9	1.46029	8.11424	66.7058	4.28126e-15	5.48686e-14	up	PARP9
LOC107986177	1.73734	-0.255606	66.6852	4.31967e-15	5.52912e-14	up	LOC107986177
SARNP	1.08679	3.37894	66.6649	4.3579e-15	5.57105e-14	up	SARNP
ZNF491	-1.12802	-0.125028	66.5524	4.57601e-15	5.84252e-14	down	ZNF491
LIX1-AS1	-1.5413	0.633154	66.5428	4.59525e-15	5.86221e-14	down	LIX1-AS1
TMEM258	1.24681	3.45292	66.5418	4.59719e-15	5.86221e-14	up	TMEM258
SEPTIN4	3.54793	3.73307	66.5266	4.62773e-15	5.89745e-14	up	SEPTIN4
OR2A1-AS1	-1.08216	-0.485119	66.5239	4.63316e-15	5.90067e-14	down	OR2A1-AS1
SHOC1	2.44418	5.4624	66.5116	4.65793e-15	5.92852e-14	up	SHOC1
LOC107986751	1.66979	0.604857	66.3797	4.93247e-15	6.26227e-14	up	LOC107986751
NCF4-AS1	1.56016	4.05067	66.3564	4.98264e-15	6.32201e-14	up	NCF4-AS1
TRAV8-3	-1.42709	-0.0105551	66.3547	4.98643e-15	6.32288e-14	down	TRAV8-3
SBNO2	1.69727	7.84018	66.3185	5.06545e-15	6.41508e-14	up	SBNO2
CUBN	-1.03689	1.65841	66.2192	5.28877e-15	6.68957e-14	down	CUBN
RNA18SN2	1.89894	9.36826	66.1557	5.43672e-15	6.87243e-14	up	RNA18SN2
LINC02217	2.81027	-0.706725	66.1514	5.44679e-15	6.87661e-14	up	LINC02217
TRIM21	1.24757	6.82523	66.1209	5.5197e-15	6.96434e-14	up	TRIM21
RALGAPA1P1	-1.06239	0.673656	66.11	5.54588e-15	6.99303e-14	down	RALGAPA1P1
COL5A1	-1.8535	-1.88125	66.0426	5.71075e-15	7.19647e-14	down	COL5A1
ZNF287	-1.10012	0.820835	66.0031	5.80959e-15	7.31195e-14	down	ZNF287
MRPL28	1.09951	4.4729	65.9949	5.83046e-15	7.33369e-14	up	MRPL28
LOC105370259	-1.61731	0.179853	65.9871	5.85009e-15	7.35382e-14	down	LOC105370259
FSTL3	1.69472	2.17569	65.9596	5.92054e-15	7.43779e-14	up	FSTL3
LOC107985242	-1.89673	-2.21257	65.8909	6.1001e-15	7.64919e-14	down	LOC107985242
LOC105376786	1.53313	2.41978	65.87	6.15579e-15	7.71428e-14	up	LOC105376786
COL19A1	-1.71694	1.21762	65.8435	6.22723e-15	7.79519e-14	down	COL19A1
TRAV9-2	-1.41134	0.49201	65.8309	6.26148e-15	7.8317e-14	down	TRAV9-2
RGMB	-1.20356	1.46948	65.8017	6.34142e-15	7.92051e-14	down	RGMB
ZC3H3	1.59746	5.23308	65.7983	6.35085e-15	7.92454e-14	up	ZC3H3
ADCY4	1.27416	2.8863	65.7289	6.5453e-15	8.15217e-14	up	ADCY4
SHOX2	3.43058	-0.28089	65.7158	6.58281e-15	8.18094e-14	up	SHOX2
LOC105373456	-1.37368	-0.856908	65.7153	6.58433e-15	8.18094e-14	down	LOC105373456
LINC01270	1.92016	3.59267	65.6888	6.66062e-15	8.26542e-14	up	LINC01270
CD300A	1.06382	7.59626	65.6516	6.76931e-15	8.39519e-14	up	CD300A
TRBJ1-6	-1.25221	0.103679	65.6431	6.79442e-15	8.42119e-14	down	TRBJ1-6
LOC105377743	1.90864	4.01953	65.6285	6.83762e-15	8.46956e-14	up	LOC105377743
BATF2	3.49257	5.23308	65.6243	6.85009e-15	8.47985e-14	up	BATF2
VASP	1.20974	9.4183	65.6106	6.8912e-15	8.52556e-14	up	VASP
ALKBH8	-1.11557	2.17193	65.5713	7.0102e-15	8.66224e-14	down	ALKBH8
ERLIN1	1.64704	5.52879	65.5451	7.09038e-15	8.75336e-14	up	ERLIN1
DNAJB11	1.06084	5.08058	65.5444	7.09255e-15	8.75336e-14	up	DNAJB11
ZNF485	-1.04572	0.660899	65.5402	7.10556e-15	8.7641e-14	down	ZNF485
APBA2	-1.05028	3.28536	65.5212	7.16466e-15	8.83164e-14	down	APBA2
ATP5PO	1.00663	4.8072	65.4866	7.27336e-15	8.9602e-14	up	ATP5PO
LOC285097	-1.85465	-1.33259	65.479	7.29737e-15	8.98434e-14	down	LOC285097
GBGT1	1.40514	4.05016	65.4723	7.31883e-15	9.0053e-14	up	GBGT1
PPM1M	1.15488	6.74304	65.3474	7.72781e-15	9.47803e-14	up	PPM1M
UBE2J1	1.21302	7.69628	65.3464	7.73098e-15	9.47803e-14	up	UBE2J1
ENTPD1-AS1	1.02416	3.29166	65.2988	7.89314e-15	9.671e-14	up	ENTPD1-AS1
FGF9	-1.98326	-1.74998	65.2802	7.95735e-15	9.7438e-14	down	FGF9
HAT1	1.19717	4.57353	65.2312	8.129e-15	9.94202e-14	up	HAT1
CGAS	1.24491	4.57935	65.2243	8.15335e-15	9.9658e-14	up	CGAS
PCOLCE2	4.97501	1.69693	65.2163	8.18178e-15	9.99455e-14	up	PCOLCE2
GCKR	3.67134	-1.61227	65.1843	8.29653e-15	1.01286e-13	up	GCKR
IGFBP7-AS1	1.849	0.0065847	65.1696	8.35005e-15	1.01879e-13	up	IGFBP7-AS1
ZNF727	-1.8272	-1.1806	65.1559	8.4001e-15	1.02366e-13	down	ZNF727
VSIG4	2.89279	3.2491	65.1465	8.43452e-15	1.02674e-13	up	VSIG4
ATP9A	2.65976	4.6118	65.1462	8.43547e-15	1.02674e-13	up	ATP9A
IL11RA	-1.00861	2.35718	65.1443	8.44263e-15	1.027e-13	down	IL11RA
IL1R2	3.45644	8.70499	65.134	8.48056e-15	1.03038e-13	up	IL1R2
COLGALT2	-1.5057	0.217678	65.1227	8.52244e-15	1.03424e-13	down	COLGALT2
TIFA	2.03685	5.67888	65.1131	8.55793e-15	1.03731e-13	up	TIFA
ATP5ME	1.08939	2.66454	65.088	8.65212e-15	1.0481e-13	up	ATP5ME
UQCRQ	1.28379	3.01793	65.03	8.87363e-15	1.07365e-13	up	UQCRQ
N4BP3	-1.30939	0.663732	65.0171	8.92386e-15	1.07845e-13	down	N4BP3
ACOT8	1.05559	3.25675	65.0089	8.95544e-15	1.08162e-13	up	ACOT8
LOC105369214	1.64755	2.75615	64.9634	9.13503e-15	1.10266e-13	up	LOC105369214
AGBL3	-1.2824	0.0141661	64.9575	9.15871e-15	1.10486e-13	down	AGBL3
TMEM208	1.19002	2.97243	64.9345	9.25071e-15	1.11529e-13	up	TMEM208
UBALD2	1.34668	6.87699	64.888	9.4403e-15	1.13546e-13	up	UBALD2
ADAP2	1.09548	4.43419	64.8618	9.54867e-15	1.14714e-13	up	ADAP2
IRAK1BP1	-1.06772	0.323343	64.765	9.96048e-15	1.1952e-13	down	IRAK1BP1
MAP9	-1.2952	1.24237	64.714	1.01844e-14	1.22062e-13	down	MAP9
TRIB1	1.43784	5.95417	64.6754	1.03571e-14	1.23913e-13	up	TRIB1
NTN4	-1.83921	-1.30689	64.6671	1.03947e-14	1.2429e-13	down	NTN4
S100P	2.63682	6.09742	64.6438	1.0501e-14	1.25267e-13	up	S100P
H3-3A	1.06392	9.85512	64.6282	1.05725e-14	1.25971e-13	up	H3-3A
ALPL	2.46442	9.59062	64.5967	1.07189e-14	1.27641e-13	up	ALPL
SLC4A10	-2.11837	1.13229	64.5406	1.09847e-14	1.30577e-13	down	SLC4A10
STK3	1.48963	3.87243	64.4945	1.12077e-14	1.33073e-13	up	STK3
IFI16	1.27004	9.2153	64.4527	1.14139e-14	1.35442e-13	up	IFI16
LINC00482	1.90865	1.82509	64.3562	1.1905e-14	1.41023e-13	up	LINC00482
SLC11A1	1.70726	8.73215	64.3482	1.19466e-14	1.41433e-13	up	SLC11A1
KLRC4	-1.568	0.491701	64.3261	1.20627e-14	1.42724e-13	down	KLRC4
ATP6V1F	1.11233	4.7979	64.3136	1.21285e-14	1.43419e-13	up	ATP6V1F
TAP1	1.46299	8.4159	64.2408	1.25199e-14	1.4779e-13	up	TAP1
DDIAS	1.48797	3.15173	64.225	1.26065e-14	1.48726e-13	up	DDIAS
GTF2H2	1.32683	4.83362	64.1999	1.27456e-14	1.50193e-13	up	GTF2H2
SERTAD1	1.12619	3.22388	64.1803	1.2855e-14	1.51394e-13	up	SERTAD1
SHKBP1	1.50628	8.12773	64.13	1.31409e-14	1.54583e-13	up	SHKBP1
S100A4	1.07611	8.62547	64.0783	1.3441e-14	1.58021e-13	up	S100A4
ZNF829	-1.00266	0.826976	64.0412	1.36607e-14	1.60419e-13	down	ZNF829
LOC105372688	5.47471	-0.219026	64.0364	1.36891e-14	1.6066e-13	up	LOC105372688
FKBP9	1.35259	2.63536	64.0308	1.37228e-14	1.60962e-13	up	FKBP9
TK1	2.40495	2.05469	64.005	1.38784e-14	1.62506e-13	up	TK1
IL4R	1.61477	8.23293	64.0021	1.38956e-14	1.62613e-13	up	IL4R
ECE1	1.25038	7.94726	63.9923	1.39552e-14	1.63217e-13	up	ECE1
CCR5AS	2.09008	1.4824	63.9861	1.39931e-14	1.63566e-13	up	CCR5AS
MORF4L2-AS1	-1.07341	-0.15812	63.9627	1.41368e-14	1.65082e-13	down	MORF4L2-AS1
SERF2	1.22597	7.34438	63.9624	1.4139e-14	1.65082e-13	up	SERF2
TMEM38A	1.32099	1.9988	63.9531	1.41962e-14	1.65609e-13	up	TMEM38A
AASS	-1.24669	0.647638	63.9525	1.42004e-14	1.65609e-13	down	AASS
HOMER3	1.55775	3.65415	63.8765	1.46796e-14	1.70904e-13	up	HOMER3
ATP6V1C1	1.34257	6.49136	63.8589	1.47927e-14	1.72122e-13	up	ATP6V1C1
AP2S1	1.11414	5.31321	63.8117	1.51014e-14	1.75513e-13	up	AP2S1
ZFP1	-1.08821	1.65971	63.7764	1.53358e-14	1.78136e-13	down	ZFP1
LOC105378085	2.31923	2.70217	63.7178	1.57344e-14	1.82556e-13	up	LOC105378085
ADAM9	1.53234	4.79813	63.6897	1.59287e-14	1.84705e-13	up	ADAM9
TNFAIP8L2	1.00024	5.7262	63.686	1.5954e-14	1.84893e-13	up	TNFAIP8L2
LOC107985690	-1.33315	0.481223	63.6776	1.60127e-14	1.85468e-13	down	LOC107985690
LOC101928214	1.47483	1.29438	63.6464	1.6233e-14	1.87699e-13	up	LOC101928214
BCL6	1.82863	10.1092	63.569	1.67921e-14	1.93723e-13	up	BCL6
NDRG2	-1.12324	1.28212	63.5358	1.70372e-14	1.96328e-13	down	NDRG2
PLEKHO2	1.05565	7.81521	63.5057	1.72628e-14	1.98815e-13	up	PLEKHO2
UBE2S	1.72611	3.57817	63.479	1.7466e-14	2.00928e-13	up	UBE2S
GLT1D1	1.32499	7.68149	63.4262	1.78744e-14	2.05278e-13	up	GLT1D1
DKK3	-1.80803	-1.54747	63.4085	1.80133e-14	2.06756e-13	down	DKK3
CC2D2A	1.47679	2.75263	63.39	1.81591e-14	2.08196e-13	up	CC2D2A
CATIP	1.64964	2.11014	63.2409	1.93833e-14	2.21731e-13	up	CATIP
PRICKLE4	1.12848	1.00207	63.1964	1.97651e-14	2.25844e-13	up	PRICKLE4
CD5	-1.09099	4.6925	63.1759	1.99429e-14	2.27748e-13	down	CD5
C1orf162	1.22715	7.22387	63.1704	1.99907e-14	2.28166e-13	up	C1orf162
IL17RA	1.14295	8.97265	63.1533	2.01411e-14	2.29625e-13	up	IL17RA
ACVR1B	1.1988	4.86321	63.1399	2.02602e-14	2.30723e-13	up	ACVR1B
LOC107985050	2.37267	0.529081	63.1367	2.02881e-14	2.30912e-13	up	LOC107985050
TPH1	-1.59135	-1.08963	63.0964	2.06489e-14	2.34887e-13	down	TPH1
LOC107986304	1.52241	2.80669	63.0903	2.07042e-14	2.35385e-13	up	LOC107986304
EFHD2	1.10852	9.09204	63.0835	2.07664e-14	2.3596e-13	up	EFHD2
STARD4	-1.11805	3.18658	63.0552	2.10256e-14	2.38771e-13	down	STARD4
NAP1L3	-1.52059	-0.140906	63.0093	2.14524e-14	2.43346e-13	down	NAP1L3
FOLR3	3.01148	5.8037	62.9701	2.18235e-14	2.4728e-13	up	FOLR3
RGS3	1.04788	5.51216	62.9608	2.19122e-14	2.48148e-13	up	RGS3
SLED1	2.7054	2.18337	62.9324	2.21871e-14	2.5112e-13	up	SLED1
HPD	2.03366	0.787275	62.9036	2.24681e-14	2.54159e-13	up	HPD
IER3-AS1	1.57568	2.26179	62.826	2.32452e-14	2.62658e-13	up	IER3-AS1
JDP2	1.11097	5.17239	62.7947	2.35665e-14	2.65845e-13	up	JDP2
H2BC20P	1.30806	0.528889	62.7888	2.36275e-14	2.66386e-13	up	H2BC20P
CA4	1.61646	5.97762	62.7863	2.36536e-14	2.66533e-13	up	CA4
SCO2	2.20406	5.21144	62.7658	2.38668e-14	2.68785e-13	up	SCO2
PDCD1LG2	2.95891	2.08989	62.6954	2.46149e-14	2.77057e-13	up	PDCD1LG2
TRIP6	1.28926	2.28919	62.6912	2.46596e-14	2.77407e-13	up	TRIP6
ADAM28	-1.16862	3.4632	62.6797	2.47847e-14	2.7866e-13	down	ADAM28
KCNJ15	1.54442	8.69734	62.6635	2.49609e-14	2.80486e-13	up	KCNJ15
OR2A20P	-1.07585	-0.00375231	62.6407	2.52121e-14	2.83152e-13	down	OR2A20P
CCDC17	1.3318	3.14769	62.6244	2.53927e-14	2.85023e-13	up	CCDC17
LOC646652	1.66942	2.78475	62.6169	2.54763e-14	2.85803e-13	up	LOC646652
CHMP2A	1.05856	6.8741	62.6087	2.55682e-14	2.86677e-13	up	CHMP2A
MCTP1	1.41559	5.6391	62.5819	2.58704e-14	2.89905e-13	up	MCTP1
TRIM2	-1.47098	0.197572	62.5071	2.67328e-14	2.98747e-13	down	TRIM2
LOC100419583	1.1041	6.15402	62.5006	2.68089e-14	2.99433e-13	up	LOC100419583
IRAK3	1.91067	8.13774	62.4088	2.79093e-14	3.10699e-13	up	IRAK3
PRG1	3.87754	-1.44405	62.398	2.80428e-14	3.12014e-13	up	PRG1
LRMDA	1.30169	1.53407	62.3838	2.8217e-14	3.13781e-13	up	LRMDA
TIMM10	2.87118	4.89024	62.3544	2.85841e-14	3.17516e-13	up	TIMM10
DRAP1	1.17655	5.80953	62.347	2.86764e-14	3.18194e-13	up	DRAP1
NMNAT2	2.62835	-0.577709	62.2933	2.93599e-14	3.256e-13	up	NMNAT2
ID2-AS1	1.35982	-0.215231	62.2485	2.99428e-14	3.31884e-13	up	ID2-AS1
RALB	1.32196	8.08233	62.2303	3.01824e-14	3.34176e-13	up	RALB
ATP6V0B	1.15627	7.03159	62.2276	3.0218e-14	3.34387e-13	up	ATP6V0B
MAP7	-1.04488	1.47753	62.1792	3.08671e-14	3.41384e-13	down	MAP7
KIF1B	1.40886	6.56603	62.1765	3.09035e-14	3.41601e-13	up	KIF1B
NEMP1	-1.03449	3.21122	62.1746	3.09296e-14	3.41704e-13	down	NEMP1
AGFG1	1.44131	7.05682	62.1364	3.14517e-14	3.47095e-13	up	AGFG1
KCNH7	2.07891	3.25248	62.1012	3.19417e-14	3.5193e-13	up	KCNH7
NCALD	-1.16184	2.79049	62.0773	3.22791e-14	3.55263e-13	down	NCALD
STBD1	1.41397	1.49892	62.0088	3.32646e-14	3.65515e-13	up	STBD1
PELATON	1.60973	6.62853	62.0014	3.33725e-14	3.66503e-13	up	PELATON
TMEM120A	1.67227	5.46233	61.9792	3.36991e-14	3.6969e-13	up	TMEM120A
RGL4	1.73311	5.97924	61.9719	3.38074e-14	3.70678e-13	up	RGL4
CAMKK2	1.10272	7.32096	61.9678	3.38679e-14	3.71142e-13	up	CAMKK2
PARD6B	-1.20899	0.254638	61.94	3.42838e-14	3.75497e-13	down	PARD6B
MKNK1-AS1	1.57702	3.67558	61.901	3.48764e-14	3.81372e-13	up	MKNK1-AS1
LINC01267	3.21795	-1.68451	61.8907	3.50338e-14	3.82887e-13	up	LINC01267
IGIP	-1.16131	2.08603	61.7661	3.70053e-14	4.0335e-13	down	IGIP
ADAMTSL4	1.28227	5.75651	61.7594	3.71134e-14	4.04311e-13	up	ADAMTSL4
CD274	2.80083	6.04547	61.7493	3.72789e-14	4.05897e-13	up	CD274
SPHK1	1.47296	1.57242	61.7362	3.74945e-14	4.08026e-13	up	SPHK1
BIK	1.70698	0.990597	61.7152	3.78416e-14	4.11583e-13	up	BIK
BAK1	1.34031	5.00507	61.7103	3.79236e-14	4.12254e-13	up	BAK1
OGFR	1.10139	6.81435	61.6426	3.90676e-14	4.23441e-13	up	OGFR
H2AC13	2.2975	-0.745068	61.5059	4.14871e-14	4.48833e-13	up	H2AC13
LINC00987	-1.13594	1.9767	61.4852	4.18663e-14	4.52454e-13	down	LINC00987
ZNF681	-1.33437	0.934212	61.4514	4.24921e-14	4.58243e-13	down	ZNF681
SFXN5	1.12061	4.29428	61.4358	4.27846e-14	4.60909e-13	up	SFXN5
TET1	-1.42429	0.74393	61.4189	4.31042e-14	4.63861e-13	down	TET1
COPE	1.25346	6.09909	61.396	4.35401e-14	4.68303e-13	up	COPE
LOC100132062	1.69959	6.6156	61.3263	4.4894e-14	4.81847e-13	up	LOC100132062
PNPLA6	1.28916	6.46614	61.2898	4.56209e-14	4.89132e-13	up	PNPLA6
TBKBP1	1.55604	5.4134	61.2499	4.64278e-14	4.97267e-13	up	TBKBP1
SLC25A53	-1.05698	1.10833	61.2499	4.64297e-14	4.97267e-13	down	SLC25A53
PLEKHA5	-1.13422	0.818024	61.2487	4.6453e-14	4.97267e-13	down	PLEKHA5
IER3	1.61866	3.88391	61.2295	4.68479e-14	5.00967e-13	up	IER3
GPR183	-1.10552	4.29237	61.2149	4.7148e-14	5.03814e-13	down	GPR183
E2F1	2.15561	2.44701	61.2142	4.71636e-14	5.03814e-13	up	E2F1
MT2A	3.15744	4.76007	61.2032	4.73914e-14	5.05716e-13	up	MT2A
TRIM55	2.94544	-2.07273	61.125	4.9051e-14	5.22876e-13	up	TRIM55
GALK1	1.64076	3.79901	61.1092	4.93931e-14	5.25972e-13	up	GALK1
CNGA4	1.81537	0.18189	61.0868	4.98831e-14	5.30634e-13	up	CNGA4
LOC105379185	-1.55272	-1.04104	61.0794	5.0045e-14	5.3179e-13	down	LOC105379185
OBSCN-AS1	-1.48112	-1.21358	61.0761	5.0117e-14	5.32009e-13	down	OBSCN-AS1
BMAL2	1.67343	0.918188	61.0711	5.0228e-14	5.3291e-13	up	BMAL2
RELT	1.02729	5.71205	61.0611	5.045e-14	5.34986e-13	up	RELT
ITPKC	1.49734	4.08361	61.0424	5.08662e-14	5.39119e-13	up	ITPKC
LRP10	1.22935	9.24652	61.0162	5.14568e-14	5.45094e-13	up	LRP10
LOC102724046	2.6392	-1.09122	60.9864	5.2136e-14	5.51714e-13	up	LOC102724046
NIBAN2	1.45381	4.67586	60.9715	5.2479e-14	5.55054e-13	up	NIBAN2
ANTXRLP1	-1.34801	-0.278132	60.8717	5.48341e-14	5.7876e-13	down	ANTXRLP1
OLAH	4.77498	3.7365	60.8032	5.65138e-14	5.94985e-13	up	OLAH
TMED1	1.00156	3.52337	60.8019	5.65468e-14	5.94985e-13	up	TMED1
SMPD5	4.01889	-1.03616	60.7752	5.72137e-14	6.01691e-13	up	SMPD5
GGTLC2	1.59454	0.414709	60.7458	5.796e-14	6.08357e-13	up	GGTLC2
RFXANK	1.00725	4.245	60.7455	5.79672e-14	6.08357e-13	up	RFXANK
NDUFS5	1.25346	3.65388	60.729	5.83903e-14	6.1248e-13	up	NDUFS5
PTPRS	-1.15191	0.573043	60.6095	6.15465e-14	6.43596e-13	down	PTPRS
TRAV17	-1.45525	0.761941	60.48	6.51572e-14	6.79955e-13	down	TRAV17
UGCG	2.00488	6.50254	60.4619	6.56789e-14	6.84346e-13	up	UGCG
FURIN	1.36394	7.62311	60.4527	6.59469e-14	6.86786e-13	up	FURIN
ZNF525	-1.05136	2.09931	60.4467	6.6123e-14	6.88268e-13	down	ZNF525
LOC105373064	1.36332	1.48334	60.428	6.66692e-14	6.93244e-13	up	LOC105373064
MAGED4B	-1.36853	-0.768663	60.3853	6.7936e-14	7.05334e-13	down	MAGED4B
PCTP	1.13463	5.07383	60.3229	6.98281e-14	7.2424e-13	up	PCTP
FAM110B	1.63402	1.19419	60.2798	7.11682e-14	7.37387e-13	up	FAM110B
CLTB	1.04219	4.74112	60.2768	7.12644e-14	7.38008e-13	up	CLTB
CR1	1.84084	8.4877	60.2636	7.16776e-14	7.41909e-13	up	CR1
STAB1	1.55995	5.74391	60.2597	7.1801e-14	7.42808e-13	up	STAB1
UST	-1.00203	1.14798	60.2503	7.20999e-14	7.45143e-13	down	UST
PKMYT1	1.5256	1.13113	60.2035	7.36025e-14	7.59128e-13	up	PKMYT1
HKDC1	-1.24612	0.535735	60.1932	7.39376e-14	7.62198e-13	down	HKDC1
MRPL53	1.15353	3.37682	60.1825	7.42888e-14	7.65431e-13	up	MRPL53
HMGB3	1.83509	1.78301	60.1725	7.4617e-14	7.68422e-13	up	HMGB3
LOC107985034	1.24404	4.33994	60.1586	7.50767e-14	7.72765e-13	up	LOC107985034
NFIL3	1.35284	6.5972	60.1532	7.52549e-14	7.74208e-13	up	NFIL3
MAGOH2P	-1.4971	-0.709782	60.1401	7.56907e-14	7.78298e-13	down	MAGOH2P
LOC105374664	2.59105	0.557812	60.0692	7.8093e-14	8.01379e-13	up	LOC105374664
FAM47E-STBD1	1.4192	1.36688	60.0341	7.93137e-14	8.13086e-13	up	FAM47E-STBD1
LOC105378122	-1.30483	-0.285736	60.0095	8.01764e-14	8.21515e-13	down	LOC105378122
PAQR4	1.24577	2.00829	59.9485	8.23665e-14	8.42683e-13	up	PAQR4
CDK5	1.13763	2.56997	59.9424	8.25861e-14	8.44504e-13	up	CDK5
LOC105376333	1.77469	5.38338	59.9005	8.41277e-14	8.59835e-13	up	LOC105376333
BCL3	1.82069	6.50685	59.8699	8.52719e-14	8.70655e-13	up	BCL3
LINC01550	-1.17128	1.55901	59.861	8.56078e-14	8.73646e-13	down	LINC01550
LOC105372539	-1.84012	-1.9241	59.8471	8.61354e-14	8.7859e-13	down	LOC105372539
ZFP36	1.12356	8.08238	59.8316	8.67231e-14	8.8414e-13	up	ZFP36
LINC00865	-1.40113	-0.455887	59.8068	8.76775e-14	8.93423e-13	down	LINC00865
SIPA1L2	1.86757	5.7702	59.7577	8.95985e-14	9.12084e-13	up	SIPA1L2
RAC2	1.10747	9.26256	59.743	9.01818e-14	9.17562e-13	up	RAC2
UQCRH	1.0541	4.19125	59.7287	9.0753e-14	9.22912e-13	up	UQCRH
IDI1	1.83118	6.28417	59.7015	9.18505e-14	9.33141e-13	up	IDI1
CD82	1.57223	6.76339	59.692	9.22382e-14	9.36611e-13	up	CD82
COX8A	1.29496	4.8026	59.677	9.28491e-14	9.42344e-13	up	COX8A
TRBV3-1	-1.4327	0.423118	59.5916	9.64179e-14	9.76615e-13	down	TRBV3-1
RBCK1	1.24498	6.7658	59.5358	9.88233e-14	9.99195e-13	up	RBCK1
FKBP5	1.78443	8.6312	59.5353	9.88437e-14	9.99195e-13	up	FKBP5
CRISP3	3.25941	4.56325	59.465	1.01959e-13	1.02967e-12	up	CRISP3
CEACAM3	1.37538	6.69677	59.4097	1.04484e-13	1.05411e-12	up	CEACAM3
IRF9	1.03399	7.32353	59.3335	1.0806e-13	1.08803e-12	up	IRF9
FKBP9P1	1.55133	-0.609222	59.3165	1.08876e-13	1.09517e-12	up	FKBP9P1
ZNF749	-1.00286	0.834063	59.2857	1.10369e-13	1.10963e-12	down	ZNF749
THEMIS	-1.33097	3.91877	59.2668	1.11293e-13	1.11782e-12	down	THEMIS
NCF1C	1.32984	8.19609	59.2122	1.14009e-13	1.14306e-12	up	NCF1C
TSPYL5	-1.2209	-0.05734	59.1749	1.15907e-13	1.1613e-12	down	TSPYL5
LOC107984781	-1.69102	-1.82124	59.1674	1.16292e-13	1.16458e-12	down	LOC107984781
NAGK	1.02339	6.88106	59.1464	1.17377e-13	1.17487e-12	up	NAGK
B3GALT4	1.23142	3.20499	59.1103	1.19263e-13	1.19257e-12	up	B3GALT4
LINC01002	1.94487	7.31893	59.1044	1.19576e-13	1.19512e-12	up	LINC01002
MDFIC	-1.04677	4.76094	59.0949	1.2008e-13	1.19897e-12	down	MDFIC
PEAK3	1.73787	4.79666	59.0578	1.22062e-13	1.21816e-12	up	PEAK3
RABAC1	1.76604	4.87034	59.0537	1.22288e-13	1.21982e-12	up	RABAC1
B3GALT2	-1.20104	0.165082	59.0379	1.23141e-13	1.22773e-12	down	B3GALT2
LOC105372656	2.761	-1.73567	58.9582	1.27559e-13	1.26885e-12	up	LOC105372656
RGS16	2.1384	0.34914	58.9579	1.27578e-13	1.26885e-12	up	RGS16
LOC107985074	1.00551	1.31051	58.9556	1.27706e-13	1.2695e-12	up	LOC107985074
LOC105372652	2.39829	-0.467984	58.9256	1.29414e-13	1.28523e-12	up	LOC105372652
VNN2	1.52915	10.2783	58.8978	1.31012e-13	1.30046e-12	up	VNN2
C2CD4D-AS1	-1.16158	0.992556	58.849	1.33871e-13	1.32561e-12	down	C2CD4D-AS1
LOC107987285	2.4437	0.524437	58.8437	1.34185e-13	1.32807e-12	up	LOC107987285
LOC105372657	2.68555	-0.716589	58.842	1.34286e-13	1.32842e-12	up	LOC105372657
FAM157A	1.8443	7.68019	58.8275	1.35153e-13	1.33576e-12	up	FAM157A
LOC105375534	2.14276	-0.956849	58.7885	1.37503e-13	1.35695e-12	up	LOC105375534
LAP3	1.99201	6.85798	58.7716	1.38537e-13	1.36649e-12	up	LAP3
LOC107987044	2.07363	1.19215	58.7426	1.40327e-13	1.38348e-12	up	LOC107987044
GBP2	1.30801	8.95128	58.6805	1.44236e-13	1.42005e-12	up	GBP2
LOC105374898	2.25926	0.733639	58.6803	1.44246e-13	1.42005e-12	up	LOC105374898
SORCS3	-1.84518	-1.29043	58.6678	1.45045e-13	1.42723e-12	down	SORCS3
WNT7A	-1.55899	-0.861807	58.6522	1.46054e-13	1.43646e-12	down	WNT7A
SPTLC2	1.0383	7.24706	58.6489	1.46265e-13	1.43783e-12	up	SPTLC2
RNASEK-C17orf49	1.19076	6.22189	58.6472	1.46377e-13	1.43824e-12	up	RNASEK-C17orf49
ZNF507	-1.02157	3.04349	58.6262	1.47743e-13	1.45097e-12	down	ZNF507
PHLPP2	-1.02212	1.99753	58.5802	1.5078e-13	1.47864e-12	down	PHLPP2
PMEL	-1.24575	-0.525165	58.5739	1.51203e-13	1.48113e-12	down	PMEL
LOC107987207	-1.7825	-1.3891	58.5732	1.51252e-13	1.48113e-12	down	LOC107987207
SEC61G	1.10827	3.7321	58.5488	1.52893e-13	1.49432e-12	up	SEC61G
LOC107985279	1.83263	1.10988	58.5346	1.53855e-13	1.50301e-12	up	LOC107985279
COPS9	1.06656	2.57423	58.5227	1.54671e-13	1.51025e-12	up	COPS9
NECAB1	2.41956	2.19766	58.5026	1.56053e-13	1.52301e-12	up	NECAB1
TTC23L-AS1	-1.84123	-2.03495	58.5007	1.56186e-13	1.52358e-12	down	TTC23L-AS1
RNASEK	1.23964	6.04991	58.4096	1.62611e-13	1.58398e-12	up	RNASEK
RADX	-1.31082	0.817816	58.3982	1.6344e-13	1.59053e-12	down	RADX
PRMT5-DT	1.49637	0.956297	58.392	1.63887e-13	1.59411e-12	up	PRMT5-DT
TLE2	-1.23095	0.469089	58.372	1.65347e-13	1.60755e-12	down	TLE2
LOC101927283	1.45543	1.20894	58.3648	1.65869e-13	1.61186e-12	up	LOC101927283
LOC100132287	1.6809	6.49749	58.356	1.66518e-13	1.61738e-12	up	LOC100132287
NPC2	1.16615	6.58354	58.3345	1.68116e-13	1.63213e-12	up	NPC2
HYAL2	1.38386	2.48713	58.3215	1.69087e-13	1.64077e-12	up	HYAL2
OTUD7A	-1.09912	0.249819	58.3022	1.70533e-13	1.65402e-12	down	OTUD7A
TRAPPC1	1.07396	6.39578	58.2956	1.71033e-13	1.65685e-12	up	TRAPPC1
USP51	-1.19401	-0.424028	58.2674	1.73188e-13	1.67657e-12	down	USP51
C14orf132	-1.52786	-0.127896	58.2599	1.73761e-13	1.68131e-12	down	C14orf132
LINC01001	1.67917	6.81862	58.2458	1.74854e-13	1.69108e-12	up	LINC01001
SNX32	1.0633	6.89485	58.0779	1.88359e-13	1.8148e-12	up	SNX32
GADD45G	1.96073	0.333106	58.0633	1.8958e-13	1.82495e-12	up	GADD45G
CMTM1	1.54336	2.57664	58.0631	1.89593e-13	1.82495e-12	up	CMTM1
PRKACB	-1.15361	5.36031	58.0445	1.91166e-13	1.83923e-12	down	PRKACB
NKX3-1	-1.69576	1.63273	58.0408	1.91482e-13	1.84139e-12	down	NKX3-1
CARF	-1.11424	2.2487	58.0124	1.93907e-13	1.86207e-12	down	CARF
METRNL	1.1524	4.81207	57.9853	1.96248e-13	1.88366e-12	up	METRNL
HLA-C	1.21064	11.4625	57.9526	1.99117e-13	1.9076e-12	up	HLA-C
RGMA	2.51352	-0.111206	57.9461	1.99686e-13	1.91215e-12	up	RGMA
MIR3614	1.55816	2.44579	57.9359	2.00593e-13	1.91903e-12	up	MIR3614
TMA7	1.12711	4.7239	57.9261	2.01471e-13	1.92562e-12	up	TMA7
PPP1R3D	1.21138	5.49247	57.8918	2.04558e-13	1.9542e-12	up	PPP1R3D
NPR2	-1.07694	0.496129	57.8724	2.06324e-13	1.97015e-12	down	NPR2
MIR1282	1.05989	5.07838	57.8579	2.07656e-13	1.98008e-12	up	MIR1282
LOC107984551	3.37389	-1.49922	57.8282	2.10402e-13	2.00532e-12	up	LOC107984551
MATCAP1	1.32885	1.99221	57.8261	2.10605e-13	2.00632e-12	up	MATCAP1
MCTP2	1.40588	7.51041	57.8243	2.1077e-13	2.00696e-12	up	MCTP2
SLC9A4	4.01862	-1.17572	57.7932	2.137e-13	2.03199e-12	up	SLC9A4
AOAH-IT1	1.71095	0.304269	57.7714	2.15771e-13	2.05073e-12	up	AOAH-IT1
ITPRIP	1.03916	6.92007	57.7518	2.17657e-13	2.06672e-12	up	ITPRIP
PDSS1	1.08356	3.64615	57.7408	2.18721e-13	2.07586e-12	up	PDSS1
UBTD1	1.71214	3.32844	57.7383	2.18965e-13	2.07645e-12	up	UBTD1
NAP1L2	-1.33613	0.399753	57.7258	2.20179e-13	2.08678e-12	down	NAP1L2
UPB1	2.12569	2.4611	57.7232	2.20433e-13	2.08821e-12	up	UPB1
LOC100133331	1.57174	6.31288	57.6712	2.25582e-13	2.13401e-12	up	LOC100133331
TNIP1	1.19124	8.26281	57.6637	2.26333e-13	2.13912e-12	up	TNIP1
LOC105378443	1.33739	6.4496	57.5918	2.33672e-13	2.2054e-12	up	LOC105378443
HLA-A	1.01396	10.8933	57.5765	2.35262e-13	2.21938e-12	up	HLA-A
SP4	-1.07605	3.49447	57.5626	2.36716e-13	2.23104e-12	down	SP4
ICAM5	1.87467	-0.138639	57.555	2.37516e-13	2.23703e-12	up	ICAM5
LOC105377499	1.77216	3.12599	57.5532	2.37704e-13	2.23723e-12	up	LOC105377499
GALNT2	1.31497	5.87345	57.5506	2.37987e-13	2.23886e-12	up	GALNT2
LOC105375754	-1.58319	0.029635	57.5371	2.39417e-13	2.25127e-12	down	LOC105375754
ALDH3B1	1.19123	5.37434	57.5306	2.40103e-13	2.25668e-12	up	ALDH3B1
LINC01988	1.98497	1.0623	57.5079	2.42532e-13	2.27671e-12	up	LINC01988
COX6B2	2.91129	-0.969299	57.5065	2.42681e-13	2.27671e-12	up	COX6B2
ZNF439	-1.01751	2.13278	57.4788	2.45689e-13	2.30089e-12	down	ZNF439
HS1BP3	1.03177	4.62678	57.4709	2.46555e-13	2.30773e-12	up	HS1BP3
ZNF319	1.04824	4.6175	57.4656	2.47132e-13	2.31206e-12	up	ZNF319
RNA45SN4	1.93433	11.0628	57.4606	2.47685e-13	2.31617e-12	up	RNA45SN4
LOC105379505	2.45883	-1.32229	57.4389	2.50079e-13	2.33748e-12	up	LOC105379505
SOCS1	2.53591	2.84119	57.427	2.51402e-13	2.34877e-12	up	SOCS1
MIA-RAB4B	1.02825	3.91635	57.4044	2.53936e-13	2.36809e-12	up	MIA-RAB4B
ADAM12	-1.29893	-0.300243	57.3963	2.5485e-13	2.37553e-12	down	ADAM12
DHRS12	1.37311	4.91683	57.3802	2.56685e-13	2.38935e-12	up	DHRS12
INSC	2.03021	1.05684	57.3463	2.60569e-13	2.42217e-12	up	INSC
AQP9	1.49999	10.566	57.3336	2.62044e-13	2.43477e-12	up	AQP9
DHRS9	1.87452	5.83905	57.3276	2.62748e-13	2.4402e-12	up	DHRS9
H4C11	1.45788	-0.780672	57.3204	2.63583e-13	2.44684e-12	up	H4C11
CDC6	2.28931	1.78214	57.3142	2.64313e-13	2.45249e-12	up	CDC6
MUC1	1.54227	0.526393	57.2893	2.67249e-13	2.47861e-12	up	MUC1
CNKSR2	-1.435	0.476062	57.2677	2.69828e-13	2.50139e-12	down	CNKSR2
LOC112267938	-1.44638	-1.39289	57.2508	2.71865e-13	2.51682e-12	down	LOC112267938
LINC01993	2.55629	-0.1713	57.2489	2.72094e-13	2.51699e-12	up	LINC01993
FBLN5	-1.18346	1.03017	57.2432	2.72785e-13	2.52189e-12	down	FBLN5
LINC01907	2.07209	-0.285459	57.2397	2.7321e-13	2.52468e-12	up	LINC01907
ZSWIM5	-1.32829	-0.252556	57.215	2.76218e-13	2.54669e-12	down	ZSWIM5
CFAP97D2	-1.70287	-0.697036	57.2093	2.76914e-13	2.55195e-12	down	CFAP97D2
ALDOA	1.10775	8.15122	57.1499	2.84325e-13	2.61553e-12	up	ALDOA
IL24	-1.14728	2.92786	57.128	2.87098e-13	2.63863e-12	down	IL24
HMMR	2.76175	1.42724	57.0694	2.94676e-13	2.70217e-12	up	HMMR
ARID5A	1.47626	6.19927	57.0621	2.95632e-13	2.70972e-12	up	ARID5A
LINC01891	-1.49528	-0.980791	57.0571	2.96291e-13	2.71453e-12	down	LINC01891
RAB4B	1.02451	3.90621	57.0238	3.00708e-13	2.75004e-12	up	RAB4B
LOC112694756	1.10783	8.12984	56.9885	3.05464e-13	2.78977e-12	up	LOC112694756
OVGP1	-1.16497	0.385789	56.9584	3.09571e-13	2.82444e-12	down	OVGP1
WDR86-AS1	-1.32692	-0.207976	56.9577	3.09676e-13	2.82444e-12	down	WDR86-AS1
SIAH2	1.86516	7.20522	56.9094	3.16395e-13	2.88443e-12	up	SIAH2
CHPT1	1.44567	6.34963	56.9073	3.16695e-13	2.88586e-12	up	CHPT1
CASD1	-1.05051	3.10563	56.8377	3.26647e-13	2.97256e-12	down	CASD1
FBLN2	-1.66597	-0.99378	56.8054	3.31366e-13	3.01281e-12	down	FBLN2
LOC105371082	1.92244	2.42156	56.7693	3.36731e-13	3.05663e-12	up	LOC105371082
HSPA7	1.2245	5.67846	56.7689	3.36787e-13	3.05663e-12	up	HSPA7
LOC107985366	1.72922	0.0295899	56.7546	3.38941e-13	3.07332e-12	up	LOC107985366
CARNS1	-1.19971	1.63603	56.7536	3.39079e-13	3.07332e-12	down	CARNS1
ZNF239	-1.20067	0.0741209	56.75	3.39626e-13	3.0769e-12	down	ZNF239
LCN2	3.46814	6.70027	56.7066	3.4625e-13	3.13413e-12	up	LCN2
LOC107985900	-1.66073	-1.56486	56.704	3.46656e-13	3.1364e-12	down	LOC107985900
P2RX1	1.20496	5.88737	56.6863	3.4939e-13	3.15974e-12	up	P2RX1
CATSPER1	1.33354	1.06784	56.6715	3.51698e-13	3.17919e-12	up	CATSPER1
IGFBP2	3.31372	0.923672	56.6461	3.55692e-13	3.21244e-12	up	IGFBP2
LINC01762	1.63576	-0.0978128	56.6432	3.56158e-13	3.21522e-12	up	LINC01762
KLF14	4.82121	-0.729273	56.6295	3.58327e-13	3.23337e-12	up	KLF14
LOC107985315	1.43236	0.851421	56.6036	3.62485e-13	3.26799e-12	up	LOC107985315
AFF3	-1.45074	2.82587	56.5755	3.67041e-13	3.30614e-12	down	AFF3
MROCKI	2.96701	-0.355769	56.573	3.67453e-13	3.30838e-12	up	MROCKI
KLHDC7B-DT	1.65176	2.55379	56.5444	3.7215e-13	3.34919e-12	up	KLHDC7B-DT
CETP	1.46552	2.30431	56.5388	3.73074e-13	3.35602e-12	up	CETP
GBP1P1	4.19888	2.60119	56.506	3.78562e-13	3.40388e-12	up	GBP1P1
TRIB2	-1.12978	4.51113	56.4646	3.85596e-13	3.46407e-12	down	TRIB2
CCNA1	3.66566	1.50933	56.4544	3.87359e-13	3.47837e-12	up	CCNA1
LOXHD1	1.73389	2.80551	56.4524	3.87699e-13	3.47988e-12	up	LOXHD1
MT1E	2.33494	0.32539	56.4292	3.91725e-13	3.51447e-12	up	MT1E
DLGAP5	2.93395	1.98941	56.4127	3.94609e-13	3.53878e-12	up	DLGAP5
MT1G	3.90406	-1.81917	56.4106	3.94986e-13	3.5406e-12	up	MT1G
THNSL1	-1.04638	1.1035	56.4027	3.96383e-13	3.54949e-12	down	THNSL1
LOC102724545	1.38719	1.79497	56.401	3.96676e-13	3.54949e-12	up	LOC102724545
FAM157C	1.7405	3.35111	56.3934	3.98021e-13	3.55996e-12	up	FAM157C
EIF1B	1.05545	6.28525	56.3716	4.01905e-13	3.58704e-12	up	EIF1B
RTN2	1.53706	3.36109	56.3714	4.01931e-13	3.58704e-12	up	RTN2
STX11	1.24852	7.36869	56.3668	4.02754e-13	3.59281e-12	up	STX11
NBEAL2	1.27541	8.56506	56.3298	4.09453e-13	3.64937e-12	up	NBEAL2
NCAPH2	1.19855	5.26604	56.3223	4.10813e-13	3.65668e-12	up	NCAPH2
VSIR	1.34576	9.88663	56.3165	4.11884e-13	3.66301e-12	up	VSIR
NCF1B	1.31995	7.96816	56.2698	4.20537e-13	3.73507e-12	up	NCF1B
SYCP3	1.36264	2.88692	56.2593	4.22498e-13	3.7492e-12	up	SYCP3
PSMB9	1.38829	7.21464	56.2556	4.23201e-13	3.75218e-12	up	PSMB9
TRAV29DV5	-1.40889	0.297482	56.2025	4.33329e-13	3.83862e-12	down	TRAV29DV5
TRG-GCC2-1	2.14122	1.47123	56.1993	4.33951e-13	3.84246e-12	up	TRG-GCC2-1
MMP27	4.23927	-1.67917	56.1734	4.38968e-13	3.8835e-12	up	MMP27
LOC105378450	3.32305	-1.09671	56.1656	4.40508e-13	3.89374e-12	up	LOC105378450
CD151	1.47506	4.39383	56.1478	4.44011e-13	3.923e-12	up	CD151
LOC105374303	3.349	-1.67347	56.1462	4.44328e-13	3.92409e-12	up	LOC105374303
PPP4C	1.14275	6.43706	56.1355	4.4645e-13	3.93941e-12	up	PPP4C
RNA45SN5	1.87145	10.8669	56.0843	4.56739e-13	4.02322e-12	up	RNA45SN5
MICAL1	1.02741	6.98235	56.0764	4.58363e-13	4.03578e-12	up	MICAL1
CAVIN3	2.07079	-0.770285	56.0722	4.5921e-13	4.03974e-12	up	CAVIN3
FAT4	-1.7212	-1.75812	56.0639	4.60917e-13	4.053e-12	down	FAT4
LINC01303	1.95149	1.17654	55.9987	4.74497e-13	4.16577e-12	up	LINC01303
RNA45SN3	1.84022	10.7608	55.9827	4.77886e-13	4.19135e-12	up	RNA45SN3
RNA45SN2	1.89205	10.857	55.9571	4.83369e-13	4.23578e-12	up	RNA45SN2
RNA45SN1	1.86339	10.9163	55.9497	4.84972e-13	4.24799e-12	up	RNA45SN1
KCNE5	1.98987	-0.255843	55.942	4.86641e-13	4.26078e-12	up	KCNE5
HDAC4	1.06545	6.0304	55.9333	4.88525e-13	4.27359e-12	up	HDAC4
RASGRP4	1.29547	7.49618	55.9237	4.9063e-13	4.29016e-12	up	RASGRP4
LOC101927522	1.95379	4.19608	55.9145	4.92645e-13	4.30593e-12	up	LOC101927522
BPI	2.59131	5.42348	55.9079	4.94098e-13	4.31678e-12	up	BPI
OAS1	2.54764	7.76947	55.9014	4.95525e-13	4.32738e-12	up	OAS1
DOCK3	-1.0412	-0.00981437	55.8972	4.96456e-13	4.33366e-12	down	DOCK3
NHLH1	1.5883	0.0675331	55.8894	4.98188e-13	4.34505e-12	up	NHLH1
EDNRB	2.87648	-0.385967	55.835	5.10395e-13	4.44009e-12	up	EDNRB
C5orf67	2.06363	0.514654	55.7799	5.23093e-13	4.54472e-12	up	C5orf67
LOC105373582	2.78753	2.93476	55.7483	5.30516e-13	4.60725e-12	up	LOC105373582
LNCATV	1.52953	1.86828	55.6824	5.46339e-13	4.73859e-12	up	LNCATV
TRIM22	1.56567	8.92648	55.6645	5.50712e-13	4.77245e-12	up	TRIM22
LOC105376517	1.53749	0.326261	55.6281	5.59724e-13	4.84641e-12	up	LOC105376517
LOC105370635	2.19507	-0.55057	55.617	5.62491e-13	4.8683e-12	up	LOC105370635
TUBA4A	1.26728	7.2269	55.59	5.69316e-13	4.92318e-12	up	TUBA4A
PDCD10	1.20873	5.01773	55.5717	5.73975e-13	4.95925e-12	up	PDCD10
EBLN2	1.19842	1.76928	55.554	5.78542e-13	4.99447e-12	up	EBLN2
CA12	2.49572	-0.212827	55.539	5.82408e-13	5.02571e-12	up	CA12
ARMC12	1.79359	0.743959	55.532	5.84243e-13	5.0394e-12	up	ARMC12
HAVCR1	-1.4148	-0.745096	55.5187	5.87719e-13	5.0651e-12	down	HAVCR1
PHF21A	1.06664	7.41436	55.4894	5.95438e-13	5.12944e-12	up	PHF21A
ARL13A	-1.27427	-1.30674	55.4762	5.98951e-13	5.15752e-12	down	ARL13A
RORC	-1.30074	0.907745	55.4508	6.05779e-13	5.2097e-12	down	RORC
TOX	-1.05935	2.33885	55.4407	6.08516e-13	5.23102e-12	down	TOX
LOC105371472	1.54403	1.91407	55.4385	6.09115e-13	5.23211e-12	up	LOC105371472
LOC105375634	2.36775	0.133673	55.4384	6.09156e-13	5.23211e-12	up	LOC105375634
TNNT1	2.07548	1.92302	55.4195	6.14307e-13	5.27189e-12	up	TNNT1
LINC01094	1.65641	3.2719	55.4181	6.14701e-13	5.27305e-12	up	LINC01094
ZYX	1.46642	9.16299	55.3853	6.23757e-13	5.34291e-12	up	ZYX
PPP1R18	1.036	8.8899	55.3747	6.26699e-13	5.36466e-12	up	PPP1R18
SUSD4	-1.25262	0.41888	55.3701	6.28001e-13	5.37129e-12	down	SUSD4
FGF13	3.08576	1.88434	55.3527	6.32906e-13	5.40869e-12	up	FGF13
TWIST2	3.46095	-0.651074	55.3427	6.35735e-13	5.43058e-12	up	TWIST2
SLC49A3	1.25183	2.61447	55.2863	6.51914e-13	5.55944e-12	up	SLC49A3
FAM20C	1.32441	2.71632	55.2531	6.61663e-13	5.64022e-12	up	FAM20C
PPIAL4H	-1.05935	-0.191345	55.2116	6.74029e-13	5.73842e-12	down	PPIAL4H
SMPDL3A	2.03276	4.00315	55.1609	6.89453e-13	5.86727e-12	up	SMPDL3A
SLC12A9	1.49878	7.0354	54.9755	7.48957e-13	6.35769e-12	up	SLC12A9
RCAN3AS	-1.35345	-1.14187	54.9539	7.56243e-13	6.41687e-12	down	RCAN3AS
LINC01531	2.12954	3.60605	54.9232	7.66671e-13	6.49451e-12	up	LINC01531
CSF2RA	1.02831	6.95251	54.8878	7.78915e-13	6.58726e-12	up	CSF2RA
CYSLTR2	-1.20057	2.2633	54.8843	7.80125e-13	6.59389e-12	down	CYSLTR2
LOC105370547	2.25856	0.57898	54.8668	7.86237e-13	6.63814e-12	up	LOC105370547
CLEC1B	1.29322	3.03919	54.823	8.01785e-13	6.7666e-12	up	CLEC1B
NME1	1.65329	2.3483	54.7823	8.16506e-13	6.88227e-12	up	NME1
LINC02656	1.67231	2.80756	54.7798	8.17405e-13	6.887e-12	up	LINC02656
MPST	1.16775	3.58462	54.7592	8.24962e-13	6.94778e-12	up	MPST
TRAFD1	1.15125	6.9425	54.7072	8.4437e-13	7.09885e-12	up	TRAFD1
LOC105378819	1.3848	2.55311	54.7055	8.44994e-13	7.09885e-12	up	LOC105378819
PLB1	1.83041	5.9952	54.6979	8.47898e-13	7.12031e-12	up	PLB1
LOC107986660	1.34349	0.60087	54.6576	8.63286e-13	7.24654e-12	up	LOC107986660
CLEC6A	2.10127	1.08018	54.6418	8.69424e-13	7.29205e-12	up	CLEC6A
GNB2	1.33196	8.22085	54.637	8.7127e-13	7.30452e-12	up	GNB2
ATG9A	1.01831	5.37565	54.6361	8.71641e-13	7.30461e-12	up	ATG9A
LOC105371026	1.10634	1.71456	54.618	8.7871e-13	7.35779e-12	up	LOC105371026
ICAM1	1.42452	6.01474	54.5871	8.90934e-13	7.45401e-12	up	ICAM1
LOC105369869	1.64974	0.508043	54.5662	8.99305e-13	7.52095e-12	up	LOC105369869
TMSB10	1.01018	8.73068	54.5331	9.12692e-13	7.62351e-12	up	TMSB10
RNF157-AS1	-1.03322	0.453875	54.5272	9.15138e-13	7.6408e-12	down	RNF157-AS1
CEP295NL	1.32716	0.525302	54.5118	9.21447e-13	7.69032e-12	up	CEP295NL
BMI1	-1.04835	3.02809	54.5034	9.24925e-13	7.71618e-12	down	BMI1
CDA	1.62631	6.79047	54.415	9.62223e-13	8.01419e-12	up	CDA
RNF149	1.05394	9.83171	54.4115	9.63739e-13	8.02353e-12	up	RNF149
SNRPG	1.17153	3.03627	54.3848	9.753e-13	8.09658e-12	up	SNRPG
ANKUB1	-1.88175	-1.2878	54.3494	9.90854e-13	8.20561e-12	down	ANKUB1
LOC105376505	2.23533	4.53334	54.3205	1.00376e-12	8.30569e-12	up	LOC105376505
LOC101929309	2.31872	-0.30559	54.2937	1.01585e-12	8.40238e-12	up	LOC101929309
ABCD1	1.06756	4.21518	54.2918	1.01672e-12	8.40612e-12	up	ABCD1
PTGDR	-1.1531	2.30678	54.2802	1.02204e-12	8.44666e-12	down	PTGDR
LOC105374836	1.23327	3.29781	54.2028	1.05806e-12	8.73723e-12	up	LOC105374836
EXOC6	1.19052	5.46259	54.1962	1.06119e-12	8.75955e-12	up	EXOC6
IFI6	3.00288	7.75596	54.1742	1.07168e-12	8.83896e-12	up	IFI6
ADAMTS3	5.63761	0.271545	54.1585	1.07922e-12	8.89395e-12	up	ADAMTS3
MRPL22	1.13625	2.43357	54.1509	1.08294e-12	8.91808e-12	up	MRPL22
ARSK	-1.04864	0.666204	54.1507	1.08303e-12	8.91808e-12	down	ARSK
LOC107984650	-1.67032	-1.80346	54.1406	1.0879e-12	8.95098e-12	down	LOC107984650
KIF21A	-1.11952	2.43136	54.1325	1.09189e-12	8.98014e-12	down	KIF21A
PIR	2.25479	-1.84545	54.1101	1.10286e-12	9.06674e-12	up	PIR
MAP3K20-AS1	1.30465	0.435201	54.0994	1.10819e-12	9.10686e-12	up	MAP3K20-AS1
IMPDH1	1.32536	7.66583	54.0679	1.12389e-12	9.22843e-12	up	IMPDH1
ABHD12B	1.48366	2.72832	54.0391	1.13848e-12	9.34066e-12	up	ABHD12B
ZFP30	-1.05821	1.49045	54.0106	1.15313e-12	9.44942e-12	down	ZFP30
TRG-AS1	-1.00266	3.27418	53.9955	1.16091e-12	9.50938e-12	down	TRG-AS1
TMEM260	1.12112	5.13463	53.9834	1.16727e-12	9.55376e-12	up	TMEM260
ROMO1	1.37242	2.1694	53.9802	1.16889e-12	9.56319e-12	up	ROMO1
LINC02596	1.83989	1.3361	53.9571	1.18109e-12	9.65909e-12	up	LINC02596
PAX3	4.05651	-1.78604	53.9506	1.18452e-12	9.68325e-12	up	PAX3
ADAMTS5	-1.74017	-0.726306	53.8813	1.22185e-12	9.96437e-12	down	ADAMTS5
TIMP4	3.79359	-1.53686	53.8467	1.24093e-12	1.00998e-11	up	TIMP4
DBH	-1.62177	-1.61055	53.8391	1.24519e-12	1.01303e-11	down	DBH
THOC3-AS1	-1.46389	-1.18459	53.8085	1.26236e-12	1.02618e-11	down	THOC3-AS1
LOC105375114	1.83108	-0.252529	53.7882	1.2739e-12	1.03516e-11	up	LOC105375114
TRAV20	-1.48703	-0.486886	53.7619	1.28898e-12	1.04657e-11	down	TRAV20
GGT2P	1.6547	-1.0963	53.7528	1.29424e-12	1.05042e-11	up	GGT2P
ACE2	2.46678	-0.711323	53.7125	1.31786e-12	1.06874e-11	up	ACE2
TMEM91	1.23571	4.73516	53.7007	1.32481e-12	1.07395e-11	up	TMEM91
ZNF519	-1.21476	0.315485	53.685	1.3342e-12	1.08113e-11	down	ZNF519
SMTNL1	2.93813	3.74604	53.6677	1.34455e-12	1.08877e-11	up	SMTNL1
BAZ1A	1.22721	8.35022	53.643	1.35952e-12	1.10033e-11	up	BAZ1A
LOC107987373	1.24406	2.19728	53.6211	1.37294e-12	1.11075e-11	up	LOC107987373
C2orf15	-1.08072	-0.502421	53.6176	1.37511e-12	1.11206e-11	down	C2orf15
PNP	1.46916	6.05691	53.61	1.3798e-12	1.11541e-11	up	PNP
SHANK1	-1.82403	-2.17353	53.5818	1.39735e-12	1.1287e-11	down	SHANK1
RRAS	1.43643	3.46835	53.5767	1.40053e-12	1.13082e-11	up	RRAS
TAAR1	3.38362	-2.06472	53.5544	1.41459e-12	1.14127e-11	up	TAAR1
TRAV13-1	-1.30091	1.01543	53.5189	1.43731e-12	1.15914e-11	down	TRAV13-1
CT75	3.35681	-1.15695	53.4853	1.45914e-12	1.17581e-11	up	CT75
TRBJ1-3	-1.26808	-0.559406	53.4781	1.4638e-12	1.17864e-11	down	TRBJ1-3
LOC155060	-1.056	0.627387	53.4526	1.4807e-12	1.19082e-11	down	LOC155060
ARHGAP5	-1.0499	3.64168	53.4295	1.49609e-12	1.20273e-11	down	ARHGAP5
SERPING1	3.42337	7.28237	53.4182	1.50372e-12	1.20838e-11	up	SERPING1
TRAV41	-1.43863	-0.401414	53.3799	1.52973e-12	1.22783e-11	down	TRAV41
CYTH4	1.10121	8.55218	53.3477	1.55198e-12	1.24519e-11	up	CYTH4
TRPV4	1.67665	-0.0046315	53.3387	1.55826e-12	1.24974e-11	up	TRPV4
LOC100506076	-1.00629	1.51339	53.33	1.56433e-12	1.25411e-11	down	LOC100506076
TFF3	3.52633	-0.668793	53.2814	1.59885e-12	1.28078e-11	up	TFF3
MAGED4	-1.2883	-0.816765	53.2432	1.62646e-12	1.30187e-11	down	MAGED4
EAF2	1.52486	2.48237	53.2401	1.62872e-12	1.30317e-11	up	EAF2
TMEM88	1.69342	2.20587	53.1922	1.66409e-12	1.33094e-11	up	TMEM88
LOC105375633	3.79427	-1.98338	53.6136	1.66952e-12	1.33424e-11	up	LOC105375633
C8orf88	1.68041	0.493376	53.175	1.67702e-12	1.33971e-11	up	C8orf88
ZC3H12A	1.28165	4.60572	53.166	1.68379e-12	1.34406e-11	up	ZC3H12A
C1orf122	1.51761	2.46615	53.1551	1.69206e-12	1.35004e-11	up	C1orf122
DBH-AS1	-1.49422	-0.682519	53.1517	1.6946e-12	1.3511e-11	down	DBH-AS1
PWAR6	-1.38319	1.0915	53.149	1.69668e-12	1.35222e-11	down	PWAR6
LINC01271	1.73372	2.72194	53.143	1.70123e-12	1.35479e-11	up	LINC01271
TCIRG1	1.1171	7.98484	53.1071	1.72887e-12	1.37357e-11	up	TCIRG1
KCNK13	1.53843	0.705235	53.0873	1.74431e-12	1.3853e-11	up	KCNK13
NDUFA13	1.02052	4.6751	53.0239	1.79464e-12	1.42194e-11	up	NDUFA13
EHF	-1.79207	-2.1166	52.9959	1.81739e-12	1.4394e-11	down	EHF
ERFE	4.33571	1.42335	52.9911	1.82128e-12	1.44192e-11	up	ERFE
ORM1	2.83271	4.84159	52.9784	1.8317e-12	1.44848e-11	up	ORM1
FTH1	1.20314	10.5713	52.9319	1.87037e-12	1.47849e-11	up	FTH1
NT5DC2	1.66817	2.49289	52.9197	1.88063e-12	1.48602e-11	up	NT5DC2
GNG10	1.5815	5.7898	52.9102	1.88867e-12	1.49179e-11	up	GNG10
PFKFB2	2.91624	6.4132	52.8942	1.90229e-12	1.50197e-11	up	PFKFB2
UVRAG-DT	1.99432	-0.971684	52.8867	1.90871e-12	1.50586e-11	up	UVRAG-DT
ZNF418	-1.02597	0.729578	52.8486	1.9416e-12	1.52944e-11	down	ZNF418
LOC102724955	1.64709	2.14574	52.8246	1.9627e-12	1.54487e-11	up	LOC102724955
ASGR1	1.42731	2.74351	52.8012	1.98346e-12	1.5606e-11	up	ASGR1
LOC107985926	2.54878	3.69271	52.7888	1.99446e-12	1.56744e-11	up	LOC107985926
ZNF883	-1.4657	-1.12617	52.7869	1.99616e-12	1.56817e-11	down	ZNF883
CKS2	1.76512	1.75106	52.7728	2.00884e-12	1.57692e-11	up	CKS2
DNAJC25-GNG10	1.57932	5.7876	52.77	2.01139e-12	1.57831e-11	up	DNAJC25-GNG10
LOC105375219	-1.45611	-0.977042	52.7558	2.02428e-12	1.58719e-11	down	LOC105375219
CEBPB-AS1	2.13309	5.68516	52.6889	2.08603e-12	1.63435e-11	up	CEBPB-AS1
SIGLEC11	1.64804	0.988459	52.6692	2.10457e-12	1.64761e-11	up	SIGLEC11
LOC101928705	-1.10413	-0.276866	52.656	2.11714e-12	1.65617e-11	down	LOC101928705
PLEK	1.00175	8.92374	52.6488	2.12394e-12	1.66085e-11	up	PLEK
LZTS3	-1.18044	-0.541408	52.6183	2.15326e-12	1.68313e-11	down	LZTS3
CCR1	1.32618	7.83041	52.5889	2.18192e-12	1.70357e-11	up	CCR1
TLR2	1.29791	9.15279	52.5835	2.18723e-12	1.70706e-11	up	TLR2
CEP55	2.52114	1.52734	52.5593	2.21116e-12	1.72441e-11	up	CEP55
MANF	1.25937	4.31581	52.5363	2.23406e-12	1.74094e-11	up	MANF
HOXB3	-1.01348	1.57598	52.5266	2.24387e-12	1.74763e-11	down	HOXB3
NFAM1	1.2116	9.00173	52.5261	2.24436e-12	1.74763e-11	up	NFAM1
LINC01163	-1.46662	-1.16823	52.5075	2.26324e-12	1.76165e-11	down	LINC01163
BEST1	1.12855	10.3906	52.4409	2.33199e-12	1.81309e-11	up	BEST1
TNFRSF1A	1.10123	8.51034	52.4152	2.35912e-12	1.83278e-11	up	TNFRSF1A
H3P6	1.06116	9.12138	52.3779	2.39901e-12	1.86235e-11	up	H3P6
MAFA-AS1	4.13994	-1.36518	52.3382	2.44219e-12	1.89298e-11	up	MAFA-AS1
CDC42EP3	1.05187	7.99475	52.3008	2.48366e-12	1.92219e-11	up	CDC42EP3
MARCHF2	1.37967	6.18985	52.2992	2.48542e-12	1.92282e-11	up	MARCHF2
MIR7848	1.60058	0.572578	52.2784	2.50873e-12	1.94012e-11	up	MIR7848
SLC4A4	-1.41294	0.0272549	52.2167	2.57931e-12	1.99167e-11	down	SLC4A4
MBOAT2	1.22931	6.12599	52.2041	2.59402e-12	2.00075e-11	up	MBOAT2
COL17A1	2.98737	1.88486	52.1906	2.60987e-12	2.01083e-11	up	COL17A1
GTF2IRD1P1	1.17228	3.20611	52.1904	2.61006e-12	2.01083e-11	up	GTF2IRD1P1
GPSM3	1.25141	8.90446	52.167	2.63767e-12	2.02903e-11	up	GPSM3
PLCE1	-1.00024	1.20071	52.1582	2.64816e-12	2.03633e-11	down	PLCE1
RAB1B	1.15769	7.00039	52.1339	2.67723e-12	2.05791e-11	up	RAB1B
TRAV23DV6	-1.5336	0.19474	52.1104	2.70569e-12	2.07821e-11	down	TRAV23DV6
SLC37A3	1.53954	5.43253	52.1096	2.70673e-12	2.07822e-11	up	SLC37A3
SIRPD	1.08736	2.33162	52.0918	2.72846e-12	2.09412e-11	up	SIRPD
B3GNT8	1.69986	4.67987	52.084	2.73803e-12	2.10067e-11	up	B3GNT8
LOC107985872	2.50536	-0.994751	52.073	2.75159e-12	2.11028e-11	up	LOC107985872
SLCO4A1-AS1	2.45522	-1.77851	52.0668	2.75929e-12	2.11538e-11	up	SLCO4A1-AS1
CELSR2	-1.05398	0.0671572	52.0644	2.76228e-12	2.11688e-11	down	CELSR2
GPR174	-1.30632	3.60376	52.0631	2.76385e-12	2.11729e-11	down	GPR174
DYNLT5	2.82698	0.185416	52.0226	2.81478e-12	2.15387e-11	up	DYNLT5
CYREN	1.04529	7.16529	52.0018	2.84126e-12	2.17168e-11	up	CYREN
MAP3K9	-1.03033	1.2499	51.9977	2.8465e-12	2.17487e-11	down	MAP3K9
GPR27	1.32948	5.17313	51.9858	2.86177e-12	2.18572e-11	up	GPR27
GCA	1.55806	9.73329	51.9849	2.86287e-12	2.18573e-11	up	GCA
RHAG	3.81605	1.68223	51.9763	2.87405e-12	2.19263e-11	up	RHAG
OR2B6	1.77363	-0.00280436	51.9513	2.9066e-12	2.21414e-11	up	OR2B6
PLEKHG5	-1.32199	-0.665207	51.9435	2.91675e-12	2.21979e-11	down	PLEKHG5
FCGR2A	1.21127	10.2833	51.9431	2.9173e-12	2.21979e-11	up	FCGR2A
RNA28SN4	1.94442	10.5352	51.9322	2.93165e-12	2.22916e-11	up	RNA28SN4
LOC101927830	1.08791	1.07584	51.9321	2.93181e-12	2.22916e-11	up	LOC101927830
LOC105370203	1.671	-0.777463	51.9309	2.93337e-12	2.22951e-11	up	LOC105370203
PHC2	1.51359	8.49532	51.9281	2.93699e-12	2.23143e-11	up	PHC2
DLG5	-1.03973	1.27388	51.9204	2.9472e-12	2.23835e-11	down	DLG5
SYNGR2	1.20341	6.18089	51.869	3.01623e-12	2.28822e-11	up	SYNGR2
LOC101927764	-1.22047	-0.97933	51.867	3.01891e-12	2.28939e-11	down	LOC101927764
FABP2	4.52404	-1.19148	51.8242	3.07776e-12	2.33229e-11	up	FABP2
RAB31	1.02342	7.98569	51.7896	3.12607e-12	2.36625e-11	up	RAB31
SLC9A7P1	1.29376	2.12463	51.7375	3.2002e-12	2.41966e-11	up	SLC9A7P1
NT5DC4	1.50265	0.935336	51.7168	3.23022e-12	2.44145e-11	up	NT5DC4
LOC107984945	1.63404	1.28013	51.7078	3.24331e-12	2.45044e-11	up	LOC107984945
FRAT2	1.0576	8.16897	51.7001	3.25457e-12	2.45803e-11	up	FRAT2
LOC105379327	1.92265	0.726919	51.6973	3.25876e-12	2.46028e-11	up	LOC105379327
ADAP1	1.02365	5.47961	51.6949	3.2622e-12	2.46196e-11	up	ADAP1
FAM72A	1.2736	0.489746	51.6832	3.27952e-12	2.4732e-11	up	FAM72A
TNNI2	1.27974	2.16378	51.6783	3.28676e-12	2.47774e-11	up	TNNI2
ZMAT4	-1.87513	-1.67783	51.64	3.34388e-12	2.51893e-11	down	ZMAT4
RENBP	1.1404	3.91459	51.6346	3.35205e-12	2.52415e-11	up	RENBP
TMLHE-AS1	1.12965	0.972198	51.6276	3.36258e-12	2.53021e-11	up	TMLHE-AS1
ALDH4A1	1.07946	1.71499	51.56	3.4666e-12	2.60462e-11	up	ALDH4A1
LOC107985079	-1.51889	0.646587	51.5532	3.47731e-12	2.61171e-11	down	LOC107985079
BIRC5	2.77572	2.15498	51.5431	3.49318e-12	2.62266e-11	up	BIRC5
CPE	2.90901	-1.213	51.5397	3.4985e-12	2.62568e-11	up	CPE
FBXL16	-1.04462	1.69711	51.534	3.50754e-12	2.63052e-11	down	FBXL16
H4C12	1.3921	-0.413913	51.525	3.52176e-12	2.64022e-11	up	H4C12
PFKFB4	1.23519	6.46276	51.4511	3.64102e-12	2.7247e-11	up	PFKFB4
F5	1.50105	6.96796	51.4464	3.64868e-12	2.72933e-11	up	F5
ZDHHC23	-1.03143	1.39832	51.4399	3.65942e-12	2.73635e-11	down	ZDHHC23
TPRG1-AS1	1.58193	-0.588216	51.431	3.67418e-12	2.74542e-11	up	TPRG1-AS1
LINC02932	3.97097	-1.894	51.8325	3.67424e-12	2.74542e-11	up	LINC02932
ETHE1	1.13207	3.36373	51.3566	3.79945e-12	2.8317e-11	up	ETHE1
TROAP	2.58456	0.698808	51.3222	3.85877e-12	2.8738e-11	up	TROAP
PCLAF	2.73519	1.60014	51.2828	3.92809e-12	2.92221e-11	up	PCLAF
LINC02908	1.08725	4.45682	51.2744	3.94296e-12	2.9322e-11	up	LINC02908
ASIC1	-1.72012	-1.59624	51.2691	3.95225e-12	2.93697e-11	down	ASIC1
LINC02555	2.25386	3.73118	51.2469	3.99206e-12	2.96439e-11	up	LINC02555
CFB	2.65829	-0.0737077	51.216	4.04818e-12	3.00496e-11	up	CFB
CAPZA2	1.04367	7.05763	51.2106	4.05803e-12	3.01117e-11	up	CAPZA2
LOC105373331	-1.38905	-0.231748	51.187	4.10144e-12	3.04227e-11	down	LOC105373331
TGFBR3	-1.27421	3.86897	51.184	4.107e-12	3.04448e-11	down	TGFBR3
H4C5	1.89836	-0.925075	51.1729	4.12753e-12	3.05828e-11	up	H4C5
PTGFR	2.70207	0.497527	51.1549	4.16115e-12	3.08207e-11	up	PTGFR
EHD1	1.22567	8.08702	51.1159	4.23513e-12	3.13458e-11	up	EHD1
ASPHD2	1.13405	2.90354	51.1056	4.25471e-12	3.14793e-11	up	ASPHD2
LOC112268121	-1.0294	0.0171713	51.0938	4.27759e-12	3.16371e-11	down	LOC112268121
CCNB2	2.54936	2.03623	51.0831	4.29815e-12	3.17776e-11	up	CCNB2
ANGPT1	-1.42971	0.422119	51.0328	4.39694e-12	3.24725e-11	down	ANGPT1
LOC107985221	1.55498	1.75164	50.9727	4.51776e-12	3.32923e-11	up	LOC107985221
ARL6	-1.13984	0.2685	50.96	4.54369e-12	3.34712e-11	down	ARL6
GSDMD	1.23444	5.85081	50.9472	4.57009e-12	3.36448e-11	up	GSDMD
CUX2	-1.47741	-1.14867	50.9469	4.57056e-12	3.36448e-11	down	CUX2
SELENOK	1.0584	4.42317	50.9154	4.63601e-12	3.41019e-11	up	SELENOK
ALPK1	1.12256	7.16323	50.8963	4.67626e-12	3.43855e-11	up	ALPK1
BAD	1.23448	2.72182	50.8868	4.6964e-12	3.45212e-11	up	BAD
VSTM1	1.53505	4.10669	50.8775	4.71604e-12	3.4653e-11	up	VSTM1
ANG	1.33908	1.19795	50.8635	4.74598e-12	3.48478e-11	up	ANG
LILRB1	1.00537	6.39417	50.7865	4.91391e-12	3.60288e-11	up	LILRB1
TMEM263	-1.15992	2.69689	50.7686	4.95379e-12	3.63081e-11	down	TMEM263
NUDT16L2P	1.14378	2.89482	50.7269	5.04795e-12	3.69318e-11	up	NUDT16L2P
COL6A2	-1.18865	2.83642	50.6882	5.13677e-12	3.75545e-11	down	COL6A2
ECHDC3	2.30067	3.04883	50.6129	5.31449e-12	3.87981e-11	up	ECHDC3
TMEM140	1.34119	6.50071	50.6066	5.32972e-12	3.88953e-11	up	TMEM140
CHCHD5	1.07714	2.22999	50.5784	5.39793e-12	3.93507e-11	up	CHCHD5
OAT	1.02927	5.34287	50.5751	5.40601e-12	3.93955e-11	up	OAT
NATD1	1.33368	6.78154	50.5448	5.48058e-12	3.98961e-11	up	NATD1
LOC100128770	1.61908	3.0573	50.4449	5.73364e-12	4.16878e-11	up	LOC100128770
PRKG2	-1.51874	-1.13203	50.4444	5.73492e-12	4.16878e-11	down	PRKG2
LINC00649	-1.04045	1.42495	50.3998	5.85178e-12	4.24765e-11	down	LINC00649
CDC45	2.77093	0.774888	50.3956	5.8628e-12	4.25414e-11	up	CDC45
LOC101060024	-1.52641	-1.51724	50.3878	5.88347e-12	4.26761e-11	down	LOC101060024
LOC105377584	2.63989	-2.33249	50.3541	5.97383e-12	4.33161e-11	up	LOC105377584
CHIT1	3.03948	2.69516	50.3524	5.9785e-12	4.33345e-11	up	CHIT1
LOC112268421	-1.54468	0.599419	50.3315	6.0352e-12	4.36988e-11	down	LOC112268421
SHROOM4	1.81739	0.235281	50.33	6.03923e-12	4.37124e-11	up	SHROOM4
ETV7	3.08686	4.52857	50.3268	6.04784e-12	4.37592e-11	up	ETV7
TARM1	2.47657	-0.00864368	50.3137	6.08394e-12	4.40047e-11	up	TARM1
MALINC1	-1.14701	-0.832374	50.3094	6.09567e-12	4.40739e-11	down	MALINC1
NLGN2	-1.17072	0.0322792	50.2948	6.1362e-12	4.43354e-11	down	NLGN2
DACH1	1.89695	2.97876	50.2793	6.1793e-12	4.46151e-11	up	DACH1
CLVS1	1.26215	2.06414	50.2752	6.19068e-12	4.46814e-11	up	CLVS1
HSP90AA1	1.61197	9.11444	50.2368	6.29903e-12	4.54473e-11	up	HSP90AA1
SELPLG	1.13639	9.21665	50.2035	6.39464e-12	4.60718e-11	up	SELPLG
LOC105378978	1.89694	0.664564	50.1948	6.42002e-12	4.62383e-11	up	LOC105378978
ENPP1	-1.6676	-1.91092	50.1884	6.4386e-12	4.63392e-11	down	ENPP1
ADGRE1	1.75862	6.31805	50.1777	6.4697e-12	4.65302e-11	up	ADGRE1
APPAT	-1.0036	1.34019	50.1749	6.47805e-12	4.65737e-11	down	APPAT
VSIG10L	1.58173	0.192439	50.1541	6.53902e-12	4.69623e-11	up	VSIG10L
MYT1L	-1.77283	-2.49521	50.0895	6.73306e-12	4.82536e-11	down	MYT1L
NT5C3A	1.18726	5.81062	50.0593	6.82572e-12	4.88832e-11	up	NT5C3A
IATPR	-1.20043	0.176277	50.0559	6.83606e-12	4.894e-11	down	IATPR
DBNDD1	-1.40465	-0.0160161	50.0361	6.89768e-12	4.93638e-11	down	DBNDD1
WDFY3-AS2	1.44181	0.848678	49.938	7.21048e-12	5.14575e-11	up	WDFY3-AS2
SUB1	1.23431	5.90154	49.8945	7.35388e-12	5.24257e-11	up	SUB1
FAM86B1	-1.11669	-1.27418	49.8385	7.54257e-12	5.37144e-11	down	FAM86B1
RABGEF1	1.03647	5.32424	49.8185	7.61139e-12	5.41856e-11	up	RABGEF1
KCNMA1	3.82849	2.18796	49.7876	7.71839e-12	5.49088e-11	up	KCNMA1
LOC105370655	-1.68472	-1.87431	49.785	7.72771e-12	5.49559e-11	down	LOC105370655
PML	1.69581	6.43431	49.74	7.88682e-12	5.60091e-11	up	PML
PPBP	1.78034	7.30198	49.7216	7.95259e-12	5.64564e-11	up	PPBP
MTVR2	1.84583	-0.397497	49.6877	8.07579e-12	5.72911e-11	up	MTVR2
NLRP12	1.27875	6.84518	49.6851	8.08505e-12	5.73367e-11	up	NLRP12
SACS	-1.19041	2.77275	49.6541	8.19936e-12	5.81069e-11	down	SACS
GGT3P	1.85057	-1.46217	49.5604	8.55489e-12	6.05421e-11	up	GGT3P
RNA28SN2	1.89201	10.2182	49.5053	8.77121e-12	6.20082e-11	up	RNA28SN2
BMPR1A	-1.12504	0.676728	49.4861	8.84748e-12	6.25257e-11	down	BMPR1A
LINC02574	3.26145	-1.85927	49.4797	8.87331e-12	6.26844e-11	up	LINC02574
JOSD2	1.51351	2.48249	49.479	8.8761e-12	6.26844e-11	up	JOSD2
LOC105377806	-1.09065	1.04135	49.4646	8.93411e-12	6.30722e-11	down	LOC105377806
TFPI	1.66132	0.493463	49.4456	9.01151e-12	6.35744e-11	up	TFPI
ADAMTS4	-1.17019	-0.496784	49.4192	9.11981e-12	6.42716e-11	down	ADAMTS4
LOC112268296	1.67426	3.05361	49.3578	9.37731e-12	6.60177e-11	up	LOC112268296
UBE2L6	1.71682	7.73268	49.31	9.58263e-12	6.74398e-11	up	UBE2L6
UQCRHL	1.00742	0.389585	49.305	9.6041e-12	6.75675e-11	up	UQCRHL
PRDX6-AS1	1.10856	0.114952	49.2926	9.65865e-12	6.79279e-11	up	PRDX6-AS1
RIPOR3	1.47585	2.28932	49.2423	9.88105e-12	6.94679e-11	up	RIPOR3
LINC03016	1.5437	-0.350283	49.2405	9.88945e-12	6.95029e-11	up	LINC03016
ZBP1	1.63291	6.55133	49.2175	9.99287e-12	7.01813e-11	up	ZBP1
CXCL16	1.28689	6.37167	49.2164	9.99778e-12	7.01915e-11	up	CXCL16
TUB	-1.19458	-0.436625	49.2003	1.00711e-11	7.06578e-11	down	TUB
DUSP1	1.42531	8.03021	49.1804	1.01623e-11	7.11748e-11	up	DUSP1
CES1	1.75323	4.6881	49.1464	1.03204e-11	7.22571e-11	up	CES1
PIERCE2	1.80027	-0.881676	49.0949	1.0564e-11	7.38863e-11	up	PIERCE2
LOC102724745	-1.32484	0.794567	49.0896	1.05896e-11	7.40145e-11	down	LOC102724745
HELZ2	1.4823	6.68925	49.082	1.06262e-11	7.4205e-11	up	HELZ2
RNA28SN5	1.84669	10.2516	49.0816	1.06278e-11	7.4205e-11	up	RNA28SN5
HTATSF1P2	1.09036	5.8637	49.0694	1.06868e-11	7.45912e-11	up	HTATSF1P2
F12	1.60091	1.11426	49.0671	1.06979e-11	7.46433e-11	up	F12
ZNF404	-1.0831	-0.151146	49.0246	1.09062e-11	7.60443e-11	down	ZNF404
LINC03040	3.16979	-2.10201	48.9988	1.10347e-11	7.6861e-11	up	LINC03040
LOC102724008	2.16791	-0.0964432	48.9975	1.10412e-11	7.68803e-11	up	LOC102724008
SLCO2B1	2.76526	-1.76907	48.9839	1.11097e-11	7.73308e-11	up	SLCO2B1
LRFN1	1.384	4.57844	48.9791	1.11338e-11	7.74451e-11	up	LRFN1
HSPA1B	1.98277	7.86814	48.961	1.12256e-11	7.80307e-11	up	HSPA1B
CYB5R3	1.10286	6.13532	48.959	1.12358e-11	7.8075e-11	up	CYB5R3
RNA28SN1	1.85106	10.2973	48.9554	1.1254e-11	7.81747e-11	up	RNA28SN1
SH3BGRL3	1.14979	9.15837	48.9511	1.12761e-11	7.83012e-11	up	SH3BGRL3
MT1F	1.50408	1.11058	48.949	1.12867e-11	7.8348e-11	up	MT1F
TSEN34	1.32497	6.15619	48.9447	1.13086e-11	7.84737e-11	up	TSEN34
LINC00537	1.07971	4.20984	48.9384	1.13414e-11	7.86745e-11	up	LINC00537
RIC3	-1.08291	2.5564	48.9362	1.13526e-11	7.87251e-11	down	RIC3
TRAV36DV7	-1.43342	-0.946803	48.907	1.15037e-11	7.96391e-11	down	TRAV36DV7
LOC107985075	-1.15523	-1.23361	48.8992	1.15447e-11	7.98662e-11	down	LOC107985075
ACKR3	-1.03709	0.139721	48.8743	1.16756e-11	8.07175e-11	down	ACKR3
GDF15	1.81903	0.417555	48.8623	1.17399e-11	8.10791e-11	up	GDF15
ENAH	-1.42133	-1.43135	48.8612	1.17457e-11	8.10913e-11	down	ENAH
EPSTI1	2.36036	7.11081	48.837	1.18751e-11	8.19574e-11	up	EPSTI1
ROM1	1.57953	0.435297	48.8084	1.20303e-11	8.29716e-11	up	ROM1
CFP	1.13205	7.31411	48.7995	1.20792e-11	8.32812e-11	up	CFP
STEAP3	1.23521	1.74878	48.7929	1.21153e-11	8.35015e-11	up	STEAP3
LOC105377452	3.14949	-1.05408	48.7651	1.22689e-11	8.44457e-11	up	LOC105377452
BASP1	1.56756	9.4422	48.7213	1.25156e-11	8.60855e-11	up	BASP1
ZNF860	-1.56041	0.658424	48.6917	1.26846e-11	8.72183e-11	down	ZNF860
CSNK1A1L	1.61378	0.632675	48.6862	1.27167e-11	8.74096e-11	up	CSNK1A1L
ORM2	1.9246	2.86026	48.6594	1.2872e-11	8.84171e-11	up	ORM2
TRPM2-AS	1.76031	-0.421353	48.6493	1.29314e-11	8.87057e-11	up	TRPM2-AS
IGF2BP3	1.49046	1.71272	48.6463	1.29486e-11	8.87936e-11	up	IGF2BP3
TRAJ33	-1.64886	-1.70744	48.6316	1.30358e-11	8.93612e-11	down	TRAJ33
SPC25	2.83448	0.12273	48.6266	1.3065e-11	8.95011e-11	up	SPC25
RRM2	2.71561	4.33504	48.6056	1.31901e-11	9.02975e-11	up	RRM2
PARP10	1.48518	6.40067	48.6012	1.32165e-11	9.04478e-11	up	PARP10
LOC101927741	2.57842	2.0774	48.5759	1.33692e-11	9.14622e-11	up	LOC101927741
CDK1	2.62172	1.66426	48.5502	1.35265e-11	9.24756e-11	up	CDK1
LTK	-1.4372	0.910459	48.5448	1.35596e-11	9.26397e-11	down	LTK
LINC02649	1.53686	2.51924	48.5318	1.36398e-11	9.31249e-11	up	LINC02649
BORCS8-MEF2B	1.13008	2.74266	48.514	1.37506e-11	9.37869e-11	up	BORCS8-MEF2B
PIK3CD-AS1	1.19072	2.52057	48.4783	1.39752e-11	9.52499e-11	up	PIK3CD-AS1
HJURP	2.498	1.46786	48.4777	1.39791e-11	9.52499e-11	up	HJURP
FCN2	3.39987	0.341022	48.4226	1.43335e-11	9.7599e-11	up	FCN2
FAM89A	1.49534	1.57254	48.3499	1.4815e-11	1.0081e-10	up	FAM89A
AURKB	1.89987	1.51288	48.3348	1.49168e-11	1.01436e-10	up	AURKB
SPACDR	1.31868	1.06995	48.3035	1.51307e-11	1.02821e-10	up	SPACDR
LINC00920	-1.38907	-0.958743	48.2818	1.52806e-11	1.03805e-10	down	LINC00920
CCM2L	2.8476	-0.484878	48.2762	1.53192e-11	1.04032e-10	up	CCM2L
CDC25C	1.72654	-0.00516181	48.2709	1.53561e-11	1.04248e-10	up	CDC25C
LOC105378046	-1.51139	-1.82727	48.2562	1.54595e-11	1.04915e-10	down	LOC105378046
RTP4	2.16556	4.35989	48.2275	1.56626e-11	1.06187e-10	up	RTP4
LOC105378157	-1.48568	-0.485944	48.2236	1.569e-11	1.06337e-10	down	LOC105378157
TRAV8-6	-1.29102	-0.444257	48.1875	1.59499e-11	1.07919e-10	down	TRAV8-6
RNA28SN3	1.80695	10.062	48.1774	1.60233e-11	1.0838e-10	up	RNA28SN3
FCRL3	-1.13602	4.34957	48.1582	1.61635e-11	1.09292e-10	down	FCRL3
CDCA5	2.31991	1.57971	48.1415	1.62864e-11	1.10086e-10	up	CDCA5
ASAH2	-1.32555	-1.31643	48.1267	1.63963e-11	1.10719e-10	down	ASAH2
GMNN	1.16405	2.0215	48.1104	1.65183e-11	1.11505e-10	up	GMNN
MOSPD3	1.42967	2.95362	48.0829	1.67266e-11	1.1269e-10	up	MOSPD3
MFSD4A	-1.11843	-0.54301	48.0828	1.6727e-11	1.1269e-10	down	MFSD4A
H2AC6	1.25144	5.1014	48.0502	1.69767e-11	1.14296e-10	up	H2AC6
CLDN9	1.64249	2.74544	48.049	1.69864e-11	1.14324e-10	up	CLDN9
MIR6892	1.52036	-0.939296	48.0372	1.70777e-11	1.149e-10	up	MIR6892
LOC102725180	1.31848	1.5977	48.0324	1.71153e-11	1.15115e-10	up	LOC102725180
TCEA3	-1.09824	1.18503	48.0156	1.72461e-11	1.15956e-10	down	TCEA3
FCMR	-1.04158	6.08228	48.0051	1.73284e-11	1.16471e-10	down	FCMR
RAB19	1.46942	1.64234	47.9694	1.76124e-11	1.18302e-10	up	RAB19
ST20	1.13332	3.96001	47.952	1.77527e-11	1.19165e-10	up	ST20
PJVK	-1.19554	-0.744751	47.9504	1.77657e-11	1.19214e-10	down	PJVK
TDRD7	1.09155	5.33868	47.9325	1.79107e-11	1.20147e-10	up	TDRD7
RN7SK	1.94696	2.02223	47.9316	1.79178e-11	1.20155e-10	up	RN7SK
CMTM5	2.03646	2.84454	47.9047	1.81384e-11	1.21554e-10	up	CMTM5
YIF1B	1.18878	4.02658	47.8902	1.82581e-11	1.22316e-10	up	YIF1B
GSTM3	-1.21264	0.853374	47.886	1.82937e-11	1.22514e-10	down	GSTM3
GPR160	1.3118	5.15467	47.8851	1.83008e-11	1.22521e-10	up	GPR160
NME8	1.16664	3.29414	47.8842	1.83086e-11	1.22534e-10	up	NME8
RMDN2	1.60796	4.94162	47.8818	1.83281e-11	1.22624e-10	up	RMDN2
LSM3	1.22952	3.16294	47.8335	1.87358e-11	1.25228e-10	up	LSM3
CACNA1C-AS1	-1.1391	-0.679696	47.8269	1.87923e-11	1.25564e-10	down	CACNA1C-AS1
SUCNR1	1.83855	1.44171	47.8149	1.88952e-11	1.2621e-10	up	SUCNR1
KIF4A	2.47717	0.940679	47.7957	1.9061e-11	1.27109e-10	up	KIF4A
RASSF6	-1.63831	-1.31482	47.7787	1.92089e-11	1.28053e-10	down	RASSF6
LRRN1	1.95221	3.07428	47.7573	1.93964e-11	1.29133e-10	up	LRRN1
KRT73	-1.56733	0.902873	47.7485	1.94743e-11	1.29525e-10	down	KRT73
AHSP	2.92167	6.38253	47.7476	1.94825e-11	1.29537e-10	up	AHSP
USP44	-1.36344	0.193907	47.7387	1.95619e-11	1.30023e-10	down	USP44
WBP2	1.04576	7.90617	47.6748	2.01385e-11	1.3355e-10	up	WBP2
TERF1P7	-1.11171	-0.553307	47.66	2.02745e-11	1.34408e-10	down	TERF1P7
LILRB5	1.76721	2.3935	47.5729	2.1095e-11	1.39594e-10	up	LILRB5
ISG15	3.73352	6.55474	47.5726	2.10979e-11	1.39594e-10	up	ISG15
KIAA1671	-1.31832	1.13074	47.5601	2.12179e-11	1.40342e-10	down	KIAA1671
JAKMIP2	-1.0967	1.47293	47.5355	2.14578e-11	1.4179e-10	down	JAKMIP2
GPRIN1	1.17974	0.681176	47.5097	2.17112e-11	1.43418e-10	up	GPRIN1
RNVU1-18	2.94181	-2.1407	47.4775	2.2032e-11	1.45301e-10	up	RNVU1-18
PROK2	1.79397	8.39504	47.4646	2.21616e-11	1.46061e-10	up	PROK2
ERBB3	-1.38245	-1.75697	47.4591	2.22174e-11	1.46382e-10	down	ERBB3
ZNF157	-1.60693	-2.03055	47.4231	2.25841e-11	1.48653e-10	down	ZNF157
NSUN7	1.77541	4.21869	47.4191	2.26254e-11	1.48831e-10	up	NSUN7
CDC20	2.61437	1.99254	47.4191	2.26258e-11	1.48831e-10	up	CDC20
PDGFD	-1.10409	1.75552	47.4167	2.26506e-11	1.48911e-10	down	PDGFD
CIAO2B	1.0228	3.22552	47.4165	2.26526e-11	1.48911e-10	up	CIAO2B
ANLN	2.29129	1.26994	47.4059	2.27621e-11	1.49486e-10	up	ANLN
EPN1	1.01316	5.96043	47.3656	2.31838e-11	1.52206e-10	up	EPN1
BTG2-DT	1.55324	0.0831509	47.3444	2.34091e-11	1.53537e-10	up	BTG2-DT
LINC00937	1.61145	2.3641	47.3325	2.35362e-11	1.54321e-10	up	LINC00937
TRAJ43	-1.8577	-1.97003	47.3201	2.36697e-11	1.55096e-10	down	TRAJ43
CLRN1-AS1	2.98735	-0.337134	47.2897	2.39997e-11	1.57208e-10	up	CLRN1-AS1
SEPTIN4-AS1	2.54609	-0.355926	47.2316	2.46436e-11	1.61166e-10	up	SEPTIN4-AS1
PLIN5	1.72069	4.57988	47.2234	2.47361e-11	1.61719e-10	up	PLIN5
DOK6	-1.10522	0.169606	47.2037	2.49589e-11	1.63071e-10	down	DOK6
LGALS9	1.30812	7.30149	47.1918	2.50945e-11	1.63852e-10	up	LGALS9
ANKK1	-1.28317	-0.810099	47.1481	2.55993e-11	1.66987e-10	down	ANKK1
LOC107985238	1.90987	2.69641	47.1218	2.5908e-11	1.68946e-10	up	LOC107985238
AANAT	1.77084	1.66384	47.0872	2.63198e-11	1.71577e-10	up	AANAT
TDRD12	-1.63865	-1.60485	47.0749	2.64673e-11	1.72428e-10	down	TDRD12
MIR223	1.61714	4.12606	47.0593	2.66564e-11	1.73548e-10	up	MIR223
IRAG1-AS1	1.62329	1.41984	47.0522	2.67432e-11	1.74002e-10	up	IRAG1-AS1
UNC93B1	1.26874	6.05855	47.0312	2.70009e-11	1.7551e-10	up	UNC93B1
CLTCL1	1.13525	2.62948	47.0166	2.71806e-11	1.76622e-10	up	CLTCL1
SLC25A37	1.30509	10.9843	47.0159	2.71899e-11	1.76626e-10	up	SLC25A37
TRAV12-3	-1.33895	0.600967	47.0064	2.7307e-11	1.7733e-10	down	TRAV12-3
PCSK9	4.88287	0.141963	46.9997	2.73905e-11	1.77816e-10	up	PCSK9
CCDC140	2.89861	-2.2633	46.9714	2.77467e-11	1.8007e-10	up	CCDC140
STRBP	-1.00595	3.46065	46.953	2.79802e-11	1.81412e-10	down	STRBP
RAB43	1.05825	5.03126	46.9455	2.80767e-11	1.81934e-10	up	RAB43
NCAM1	-1.00358	2.14834	46.9453	2.80785e-11	1.81934e-10	down	NCAM1
PARP11-AS1	-1.28555	-0.266218	46.9446	2.80879e-11	1.81936e-10	down	PARP11-AS1
GPR137	1.08993	3.27818	46.8994	2.86733e-11	1.85551e-10	up	GPR137
WSB1	1.18018	7.93846	46.8912	2.87801e-11	1.86124e-10	up	WSB1
KCTD14	2.97028	-0.579288	46.8833	2.8885e-11	1.86742e-10	up	KCTD14
[truncated: 2,412 more rows]
